# Supplementary material
Source: PubMed Central journal article supplement (PMC9771864)

Supplementary Figure 2. Heatmap showing top 10 genes expression per cluster in 5 lung samples (3' v3 scRNA-seq chemistry).

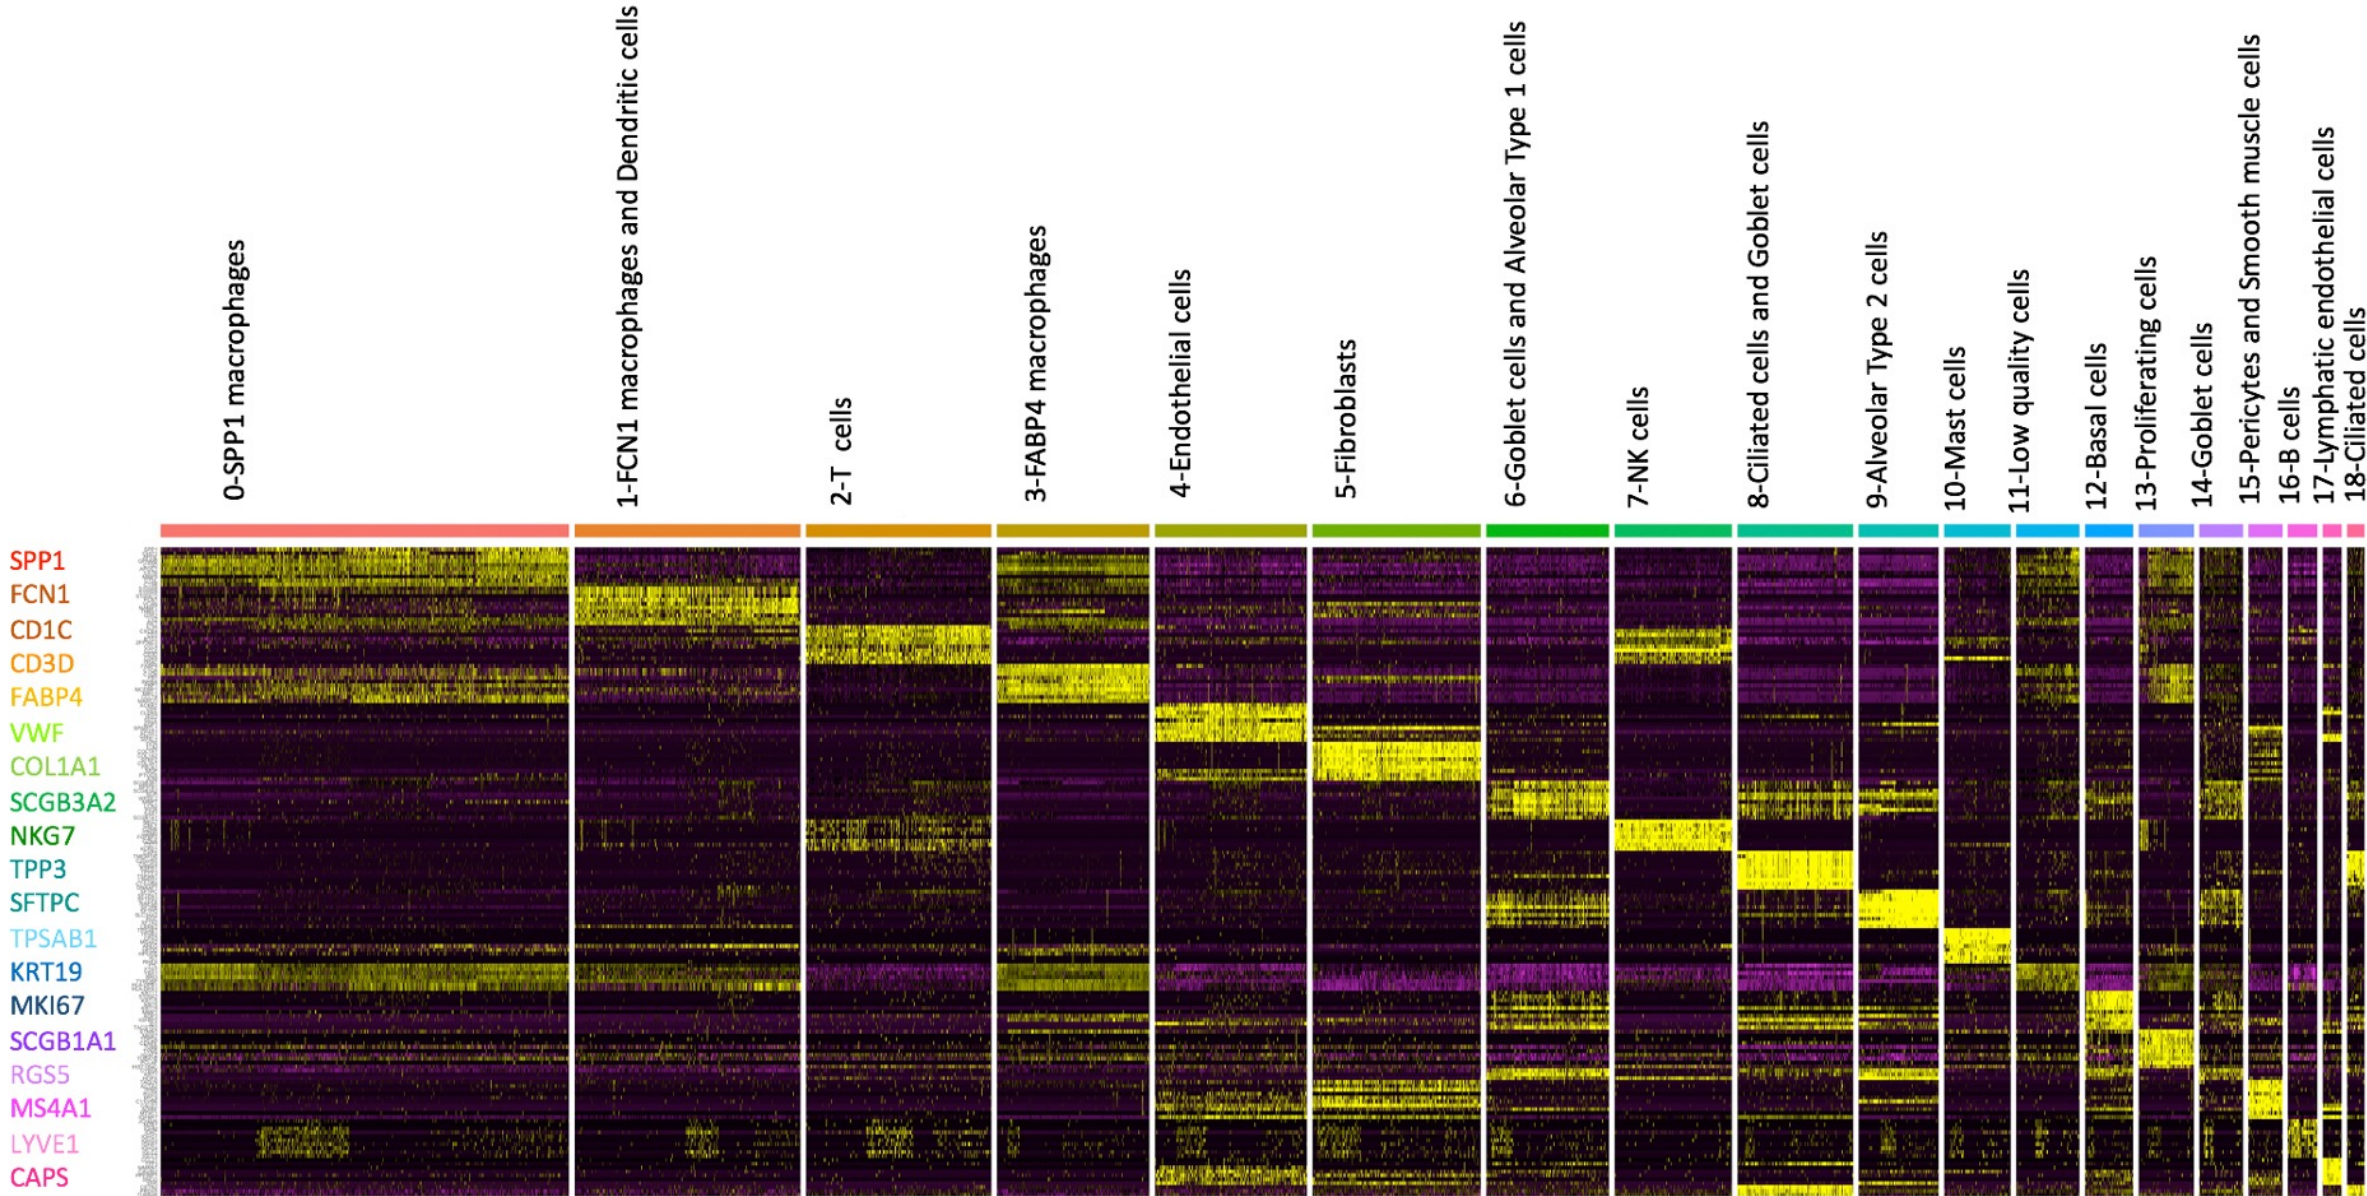

Supplementary Figure 3. FeaturePlot of gene markers expression for macrophages, dendritic cells, proliferating cells and other genes of interest including IFI27, CCL18, MMP9, PLA2G7, ATF5, TFEB genes in 5 lung samples (3' v3 Chemistry). SPP1, MERTK, LGMN gene markers are expressed in the same macrophage clusters. FABP4 and INHBA gene markers are co-expressed. FCN1 and IL1B are expressed in the same macrophage cluster. Dendritic cells gene marker CD1C is expressed in the same cluster as FCN1 macrophages. Proliferating cells express both SPP1 and FABP4 macrophage markers.

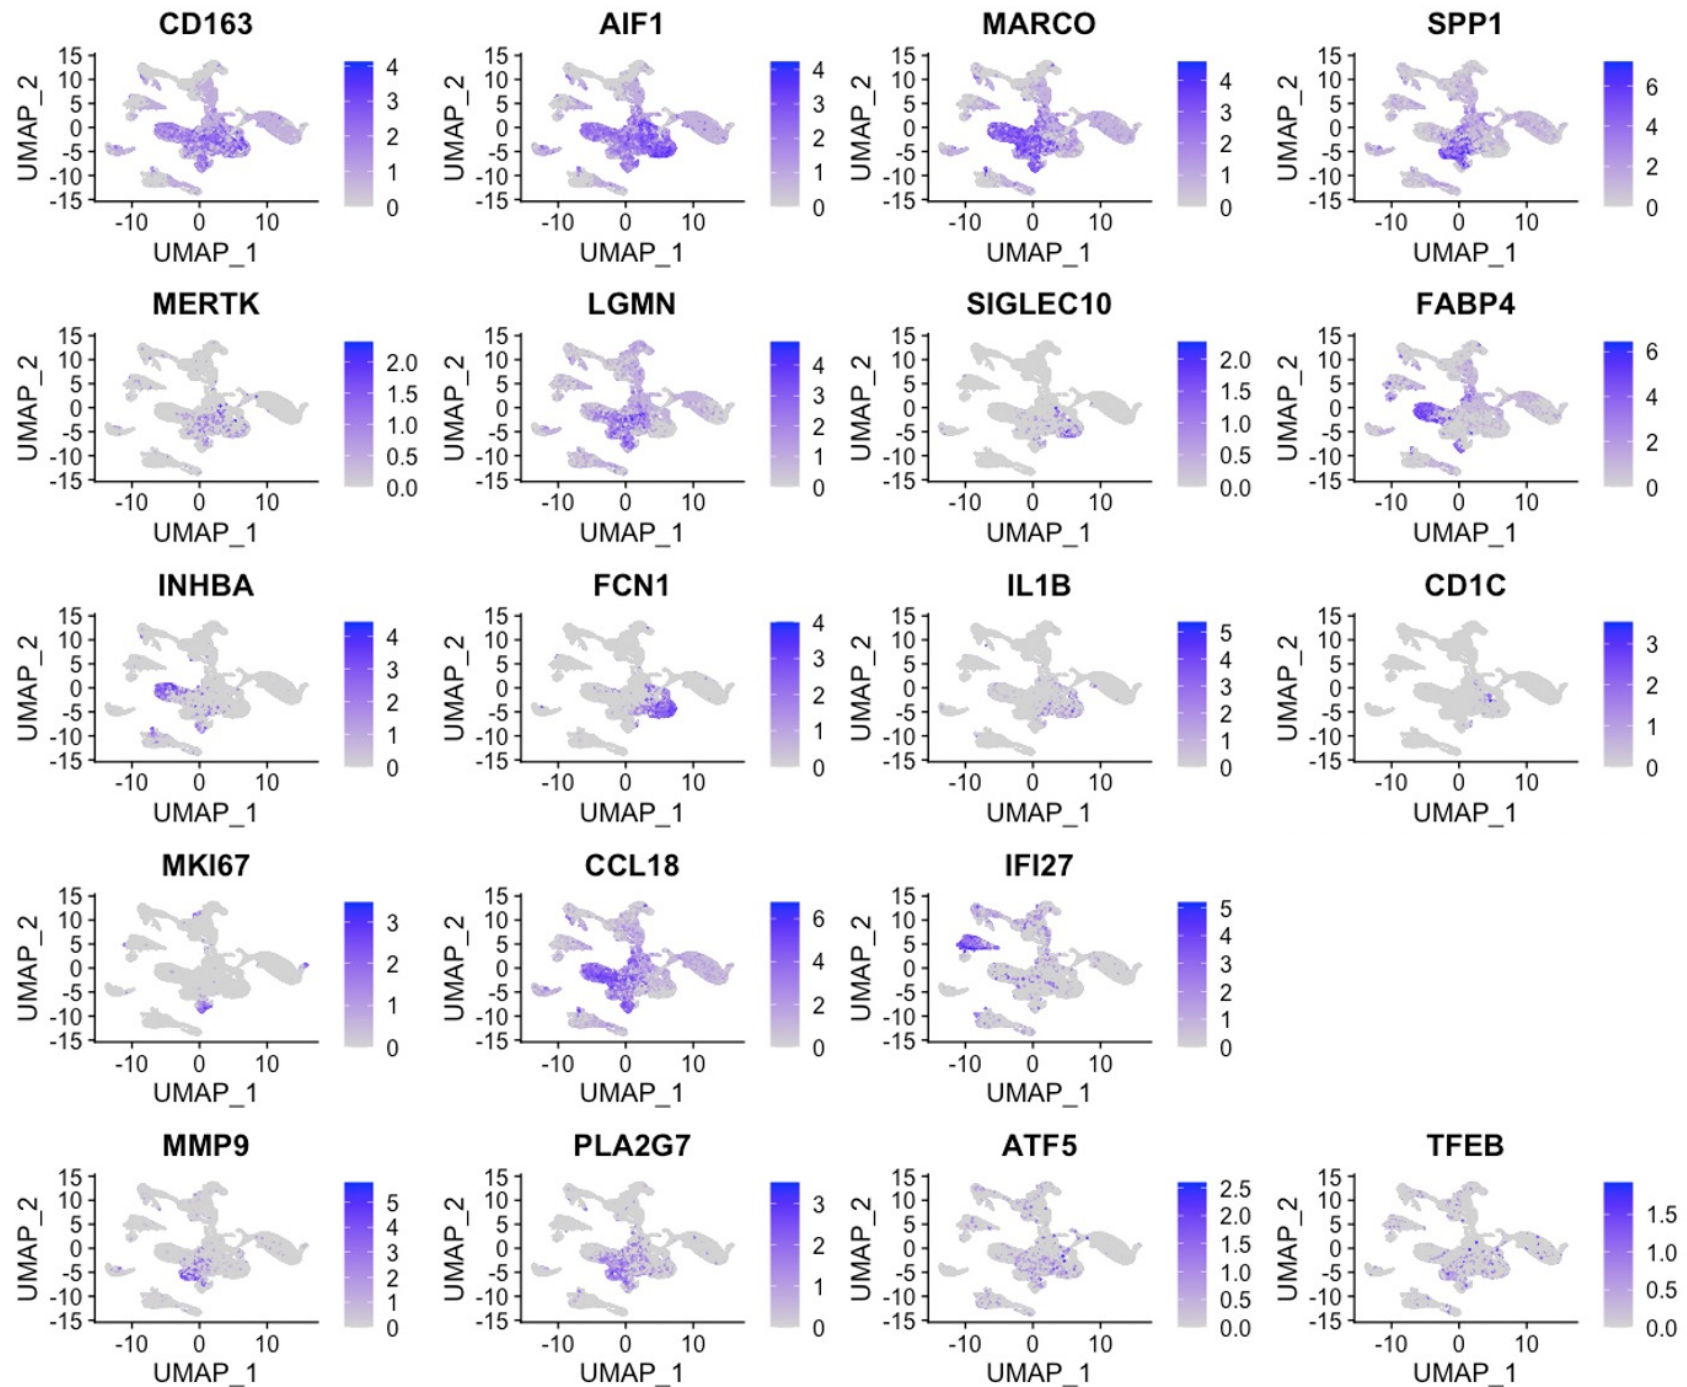



Supplemental Figure 5. Gene Ontology findings for differentiating genes between SPP1 Mφ vs FABP4- and FCN1 Mφ.

|                                                     | Homo sapiens (REF) |    |          |                 |     |             |          |
|-----------------------------------------------------|--------------------|----|----------|-----------------|-----|-------------|----------|
| GO biological process complete                      | #                  | #  | expected | Fold Enrichment | +/- | raw P value | FDR      |
| → very-low-density lipoprotein particle clearance   | 6                  | 2  | .02      | > 100           | +   | 1.93E-04    | 4.68E-02 |
| → plasma lipoprotein particle clearance             | 39                 | 3  | .10      | 28.80           | +   | 1.91E-04    | 4.77E-02 |
| → regulation of plasma lipoprotein particle levels  | 75                 | 5  | .20      | 24.96           | +   | 2.30E-06    | 1.13E-03 |
| cholesterol efflux                                  | 25                 | 4  | .07      | 59.91           | +   | 1.02E-06    | 5.73E-04 |
| → cholesterol transport                             | 60                 | 4  | .16      | 24.96           | +   | 2.54E-05    | 9.32E-03 |
| → sterol transport                                  | 76                 | 4  | .20      | 19.71           | +   | 6.13E-05    | 2.15E-02 |
| → organic hydroxy compound transport                | 151                | 5  | .40      | 12.40           | +   | 5.92E-05    | 2.12E-02 |
| steroid catabolic process                           | 26                 | 3  | .07      | 43.21           | +   | 6.22E-05    | 2.13E-02 |
| → lipid catabolic process                           | 304                | 7  | .81      | 8.62            | +   | 1.79E-05    | 6.90E-03 |
| → lipid metabolic process                           | 1222               | 15 | 3.26     | 4.60            | +   | 5.18E-07    | 3.03E-04 |
| → steroid metabolic process                         | 262                | 6  | .70      | 8.58            | +   | 7.69E-05    | 2.47E-02 |
| neutrophil degranulation                            | 482                | 14 | 1.29     | 10.88           | +   | 3.13E-11    | 1.24E-07 |
| → neutrophil mediated immunity                      | 493                | 14 | 1.32     | 10.63           | +   | 4.19E-11    | 9.44E-08 |
| → myeloid leukocyte mediated immunity               | 515                | 14 | 1.38     | 10.18           | +   | 7.34E-11    | 8.91E-08 |
| → leukocyte mediated immunity                       | 755                | 14 | 2.02     | 6.94            | +   | 9.25E-09    | 7.68E-06 |
| → immune effector process                           | 1095               | 15 | 2.92     | 5.13            | +   | 1.29E-07    | 8.45E-05 |
| → immune system process                             | 2849               | 21 | 7.61     | 2.76            | +   | 6.67E-06    | 2.92E-03 |
| myeloid cell activation involved in immune response | 524                | 15 | 1.40     | 10.72           | +   | 6.67E-12    | 1.05E-07 |
| → leukocyte activation involved in immune response  | 630                | 15 | 1.68     | 8.92            | +   | 8.36E-11    | 9.42E-08 |
| → cell activation involved in immune response       | 634                | 15 | 1.69     | 8.86            | +   | 9.12E-11    | 9.59E-08 |
| → immune response                                   | 1972               | 18 | 5.27     | 3.42            | +   | 2.10E-06    | 1.07E-03 |
| → response to stimulus                              | 8496               | 37 | 22.69    | 1.63            | +   | 1.55E-04    | 4.02E-02 |

Supplemental Figure 6. Differentiating genes between SPP1 M $\phi$  and FABP4 M $\phi$  during analysis of only macrophages, dendritic cells, proliferating M $\phi$  from 1 control and 4 SSc-ILD lung samples in 3' v3 chemistry.

|         | p_val | avg_logFC  | pct.1 | pct.2 | p_val_adj |
|---------|-------|------------|-------|-------|-----------|
| SPP1    | 0     | 3.30283596 | 0.802 | 0.205 | 0         |
| CCL2    | 0     | 1.9948943  | 0.459 | 0.077 | 0         |
| LGMN    | 0     | 1.33368645 | 0.828 | 0.496 | 0         |
| RGS1    | 0     | 1.19074799 | 0.719 | 0.268 | 0         |
| MARCKS  | 0     | 1.16429467 | 0.722 | 0.179 | 0         |
| CCL3    | 0     | 1.15787983 | 0.538 | 0.131 | 0         |
| A2M     | 0     | 0.98929751 | 0.686 | 0.186 | 0         |
| CTSB    | 0     | 0.96867367 | 1     | 0.995 | 0         |
| EMP1    | 0     | 0.943562   | 0.736 | 0.269 | 0         |
| CD84    | 0     | 0.932686   | 0.833 | 0.341 | 0         |
| LILRB4  | 0     | 0.9031076  | 0.827 | 0.342 | 0         |
| CALM3   | 0     | 0.88730018 | 0.873 | 0.654 | 0         |
| GPR183  | 0     | 0.8415434  | 0.66  | 0.203 | 0         |
| FNIP2   | 0     | 0.81529597 | 0.826 | 0.384 | 0         |
| PLEKHO1 | 0     | 0.74960591 | 0.656 | 0.206 | 0         |
| CD48    | 0     | 0.73841137 | 0.667 | 0.182 | 0         |
| FPR3    | 0     | 0.68726643 | 0.72  | 0.317 | 0         |
| SGK1    | 0     | 0.66610425 | 0.918 | 0.679 | 0         |
| ABCA1   | 0     | 0.63707043 | 0.702 | 0.296 | 0         |
| HM13    | 0     | 0.63642167 | 0.891 | 0.542 | 0         |
| LIMS1   | 0     | 0.60535518 | 0.947 | 0.825 | 0         |
| TTYH3   | 0     | 0.58333966 | 0.679 | 0.213 | 0         |
| LGALS1  | 0     | 0.57432743 | 0.994 | 0.993 | 0         |
| PEA15   | 0     | 0.56913487 | 0.601 | 0.182 | 0         |

Supplemental Figure 7. Analysis of only macrophages, monocytes, dendritic cells, proliferating cells of 1 normal and 4 SSc-ILD lung samples in 3' v3 chemistry performed using 8 Principal Components and resolution 0.5 as per clustree package (Seurat, Satija Lab).

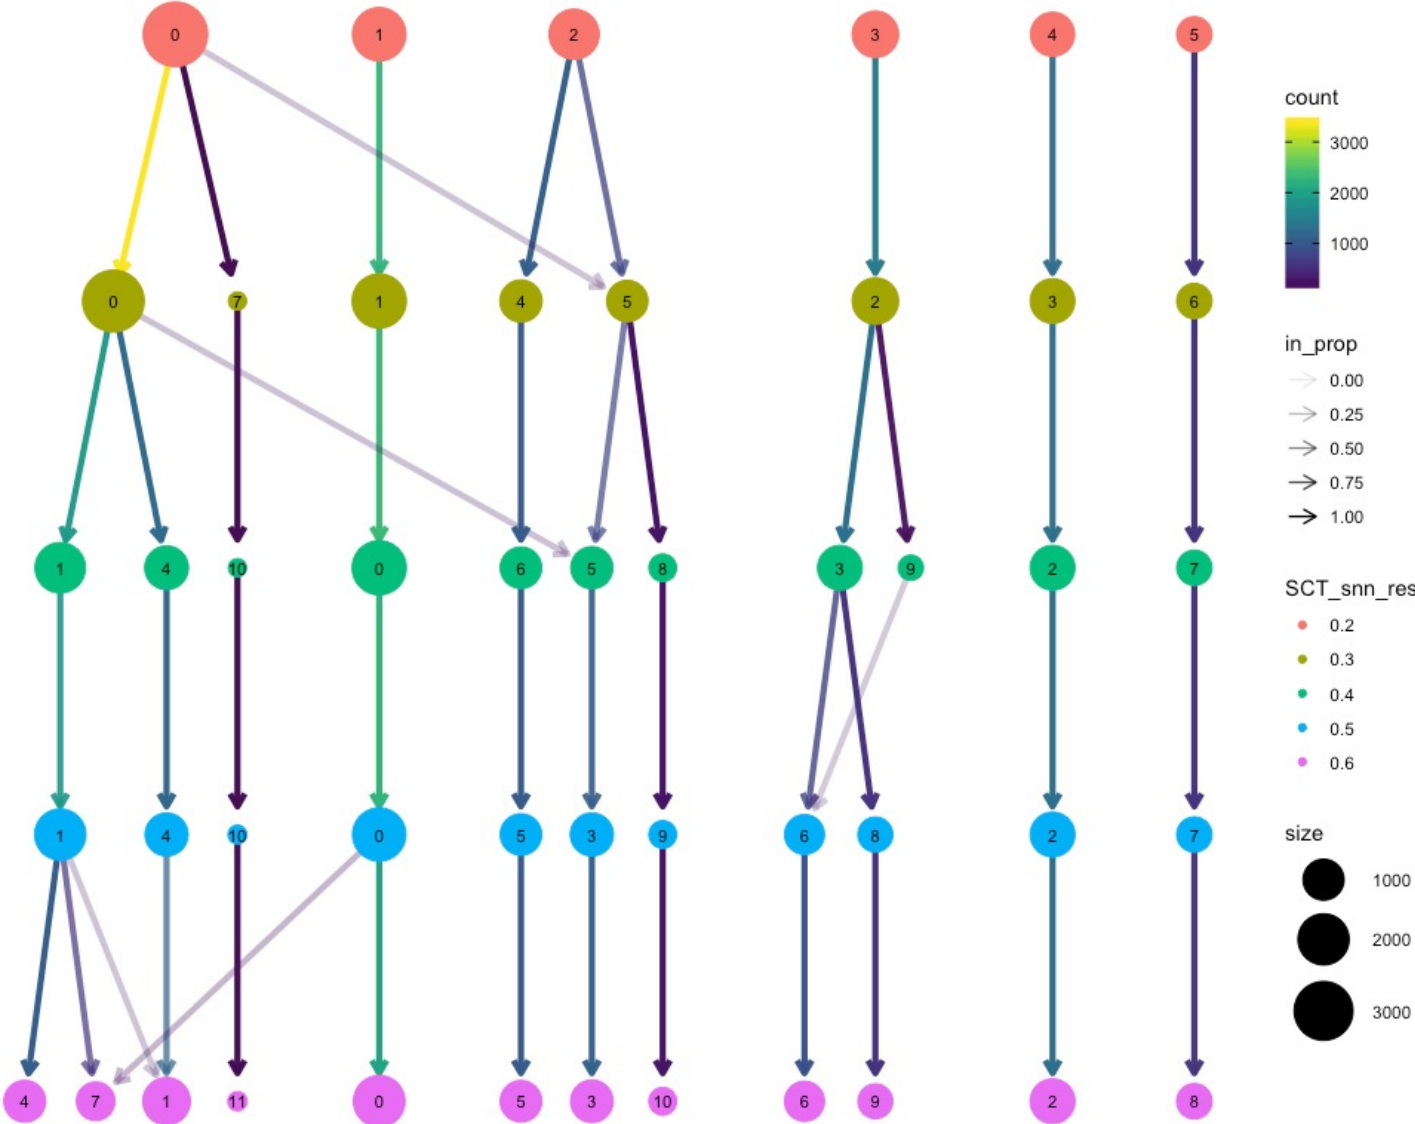





Supplementary Figure 9. Split DotPlot of macrophage subpopulations gene markers, dendritic cells, proliferating cells and other genes expression per cluster of 6 lungs in 5' v1 chemistry. *SPP1* gene is upregulated in the scleroderma macrophages in respective macrophage and proliferating cell clusters. *MMP9* is upregulated by the SSc-ILD SPP1 M $\phi$ .

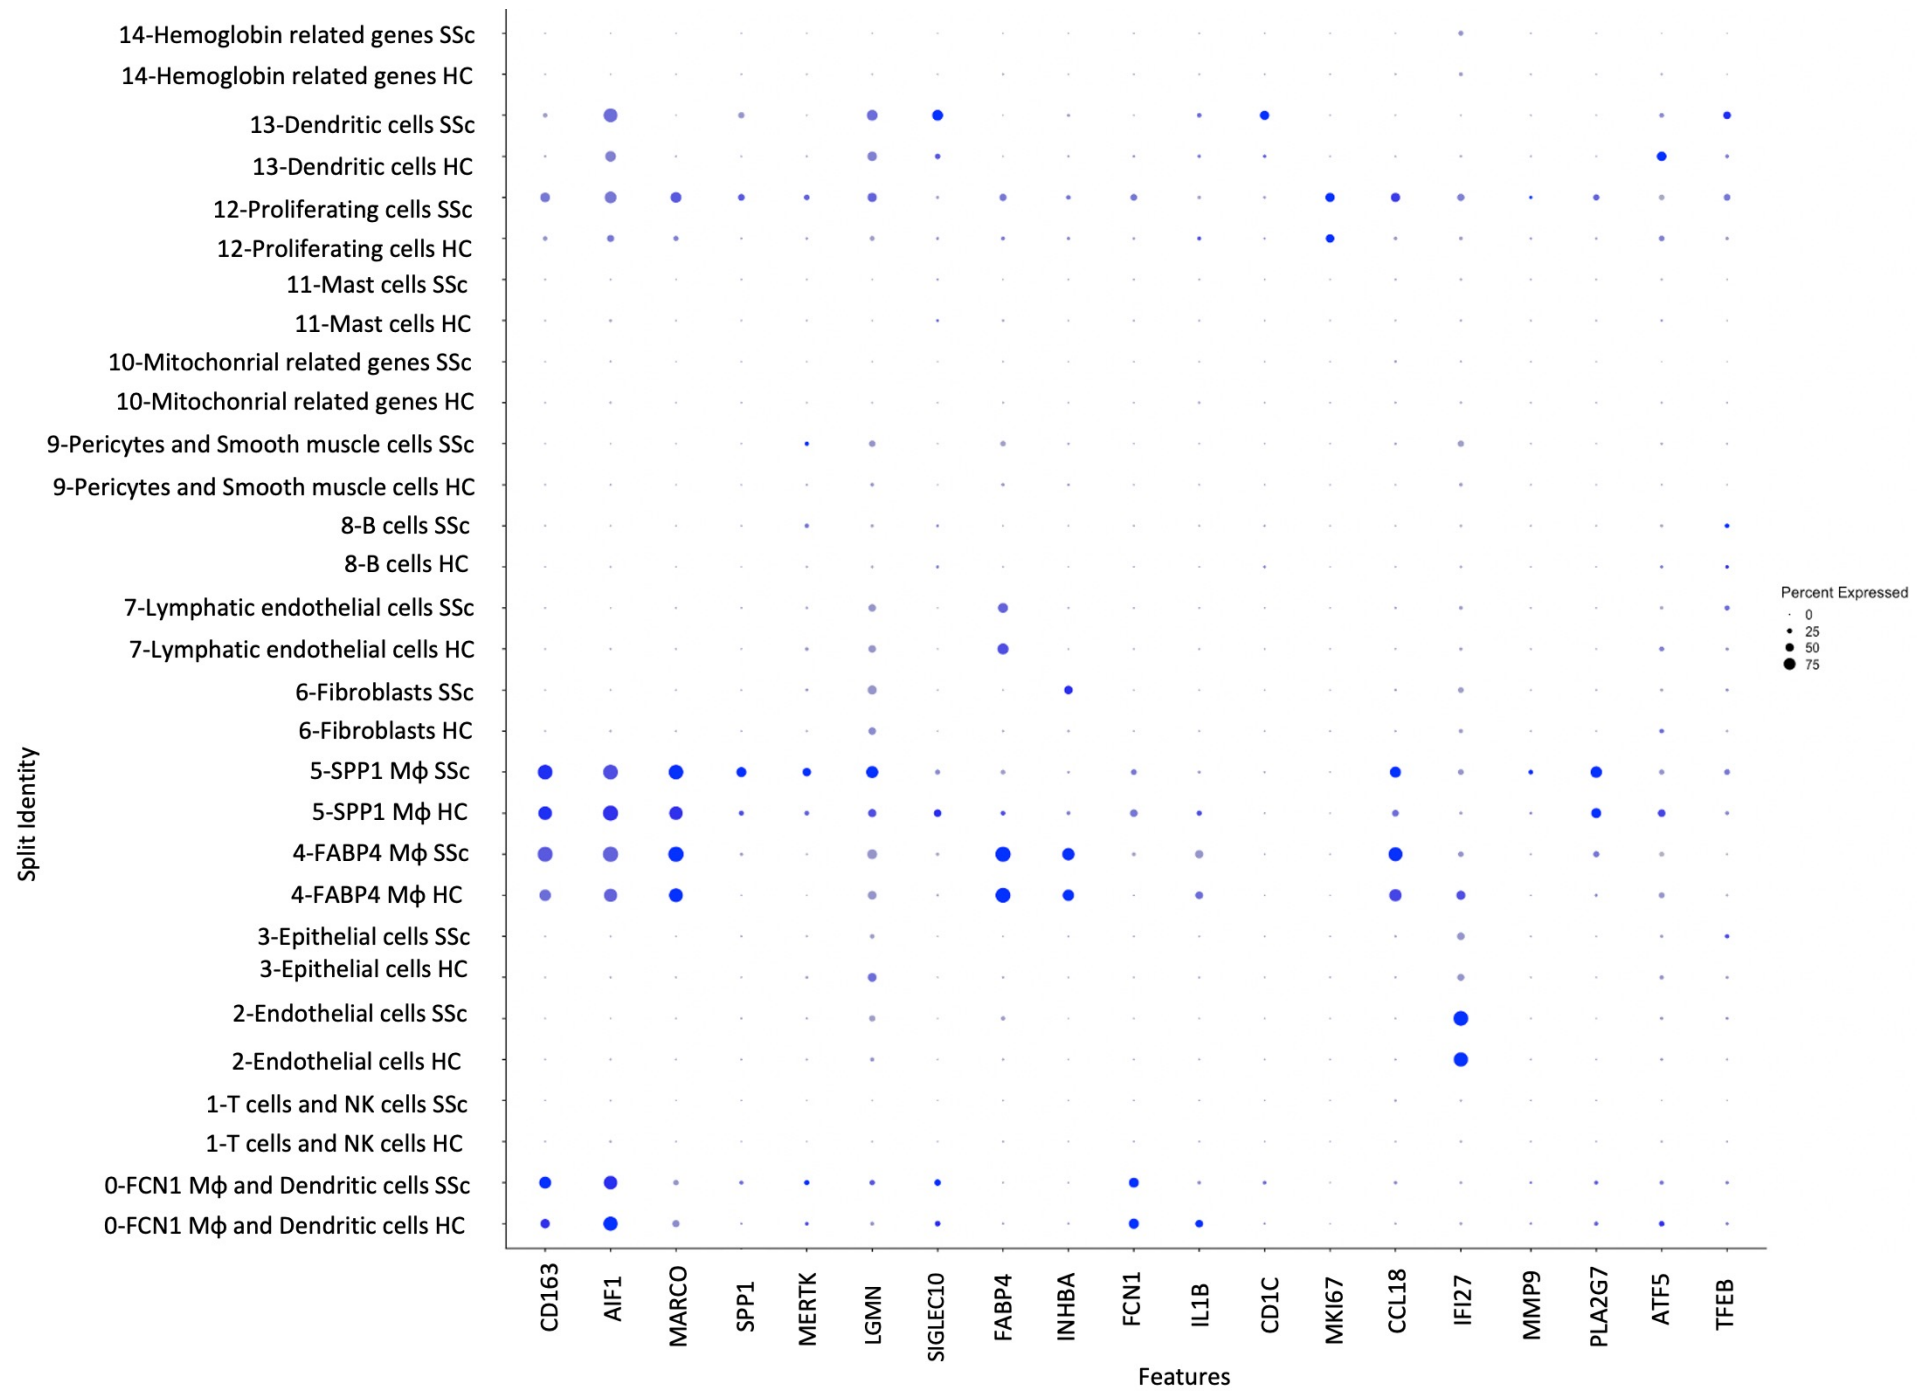

Supplementary Figure 10. FeaturePlot of macrophage subpopulations gene markers, dendritic cells, proliferating cells and other genes expression during analysis of macrophages, dendritic cells, proliferating cells from 6 lungs in 5' v1 chemistry. *SPP1*, *MERTK*, *LGMN* genes are co-expressed in the same macrophage cluster.

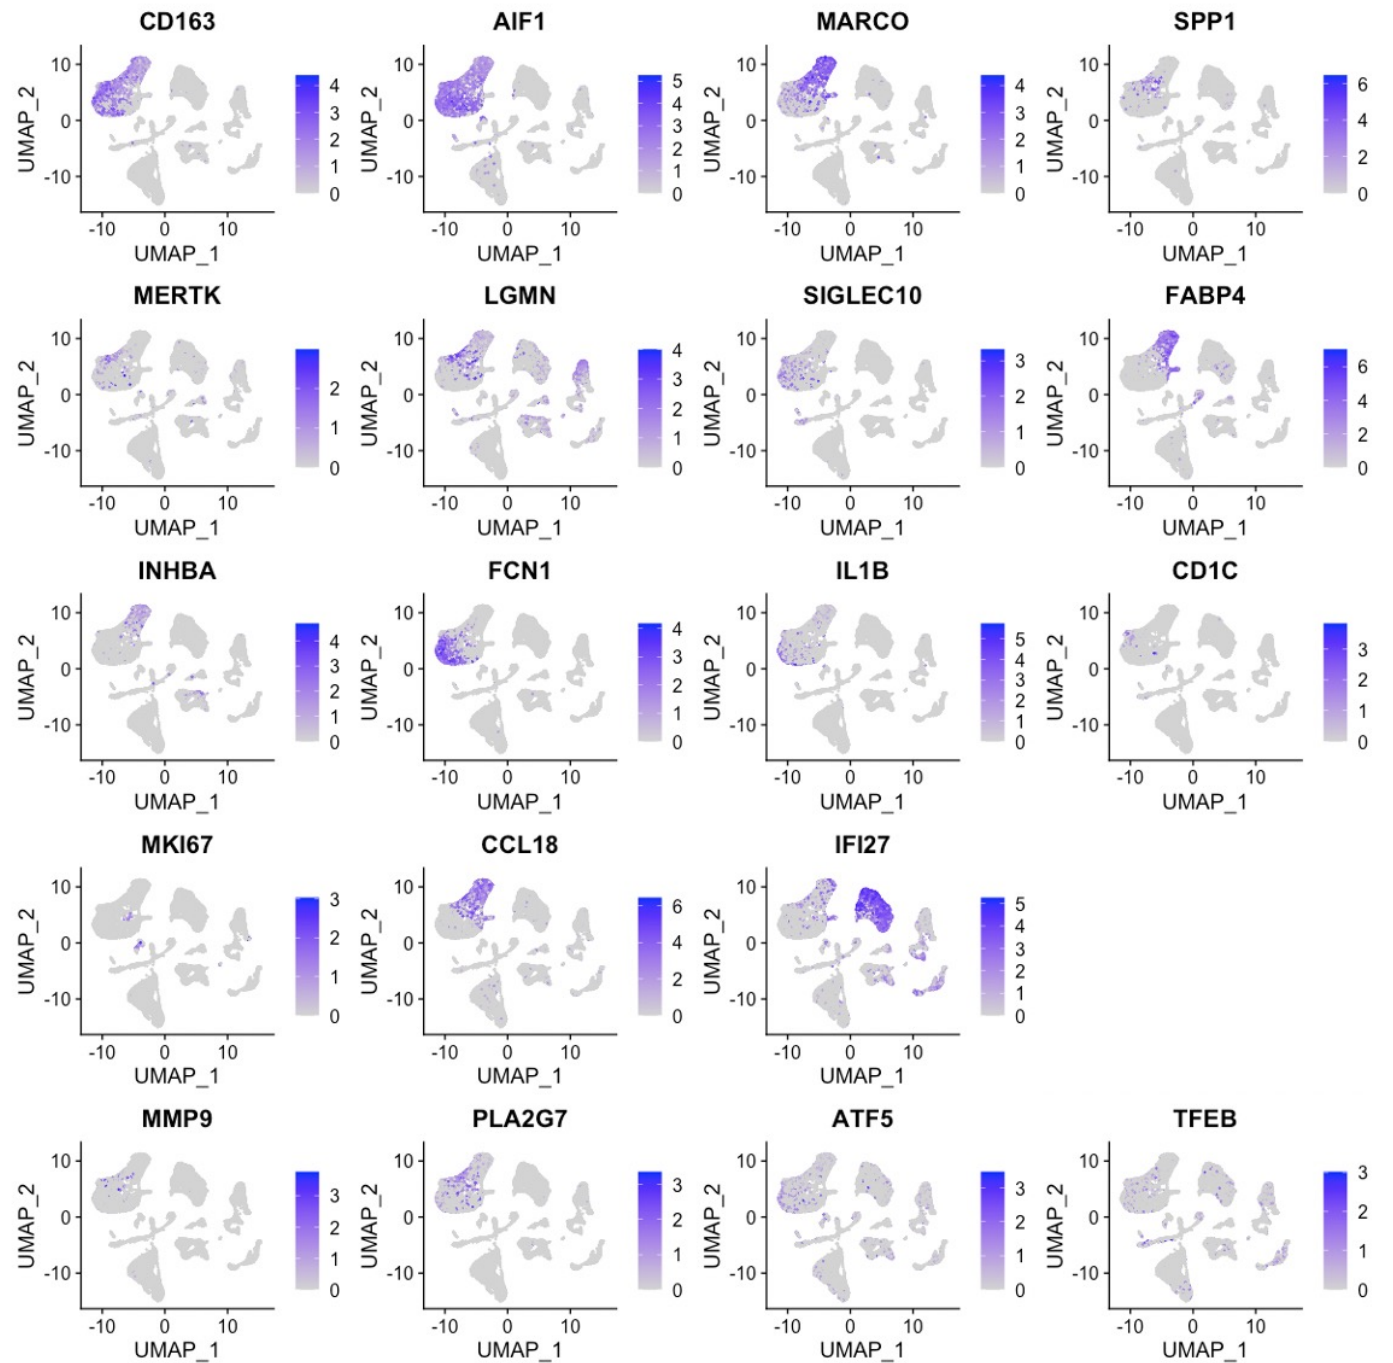

Supplementary Figure 11. Heatmap of top 10 genes expression per cluster of 6 lung samples in 5' v1 chemistry.

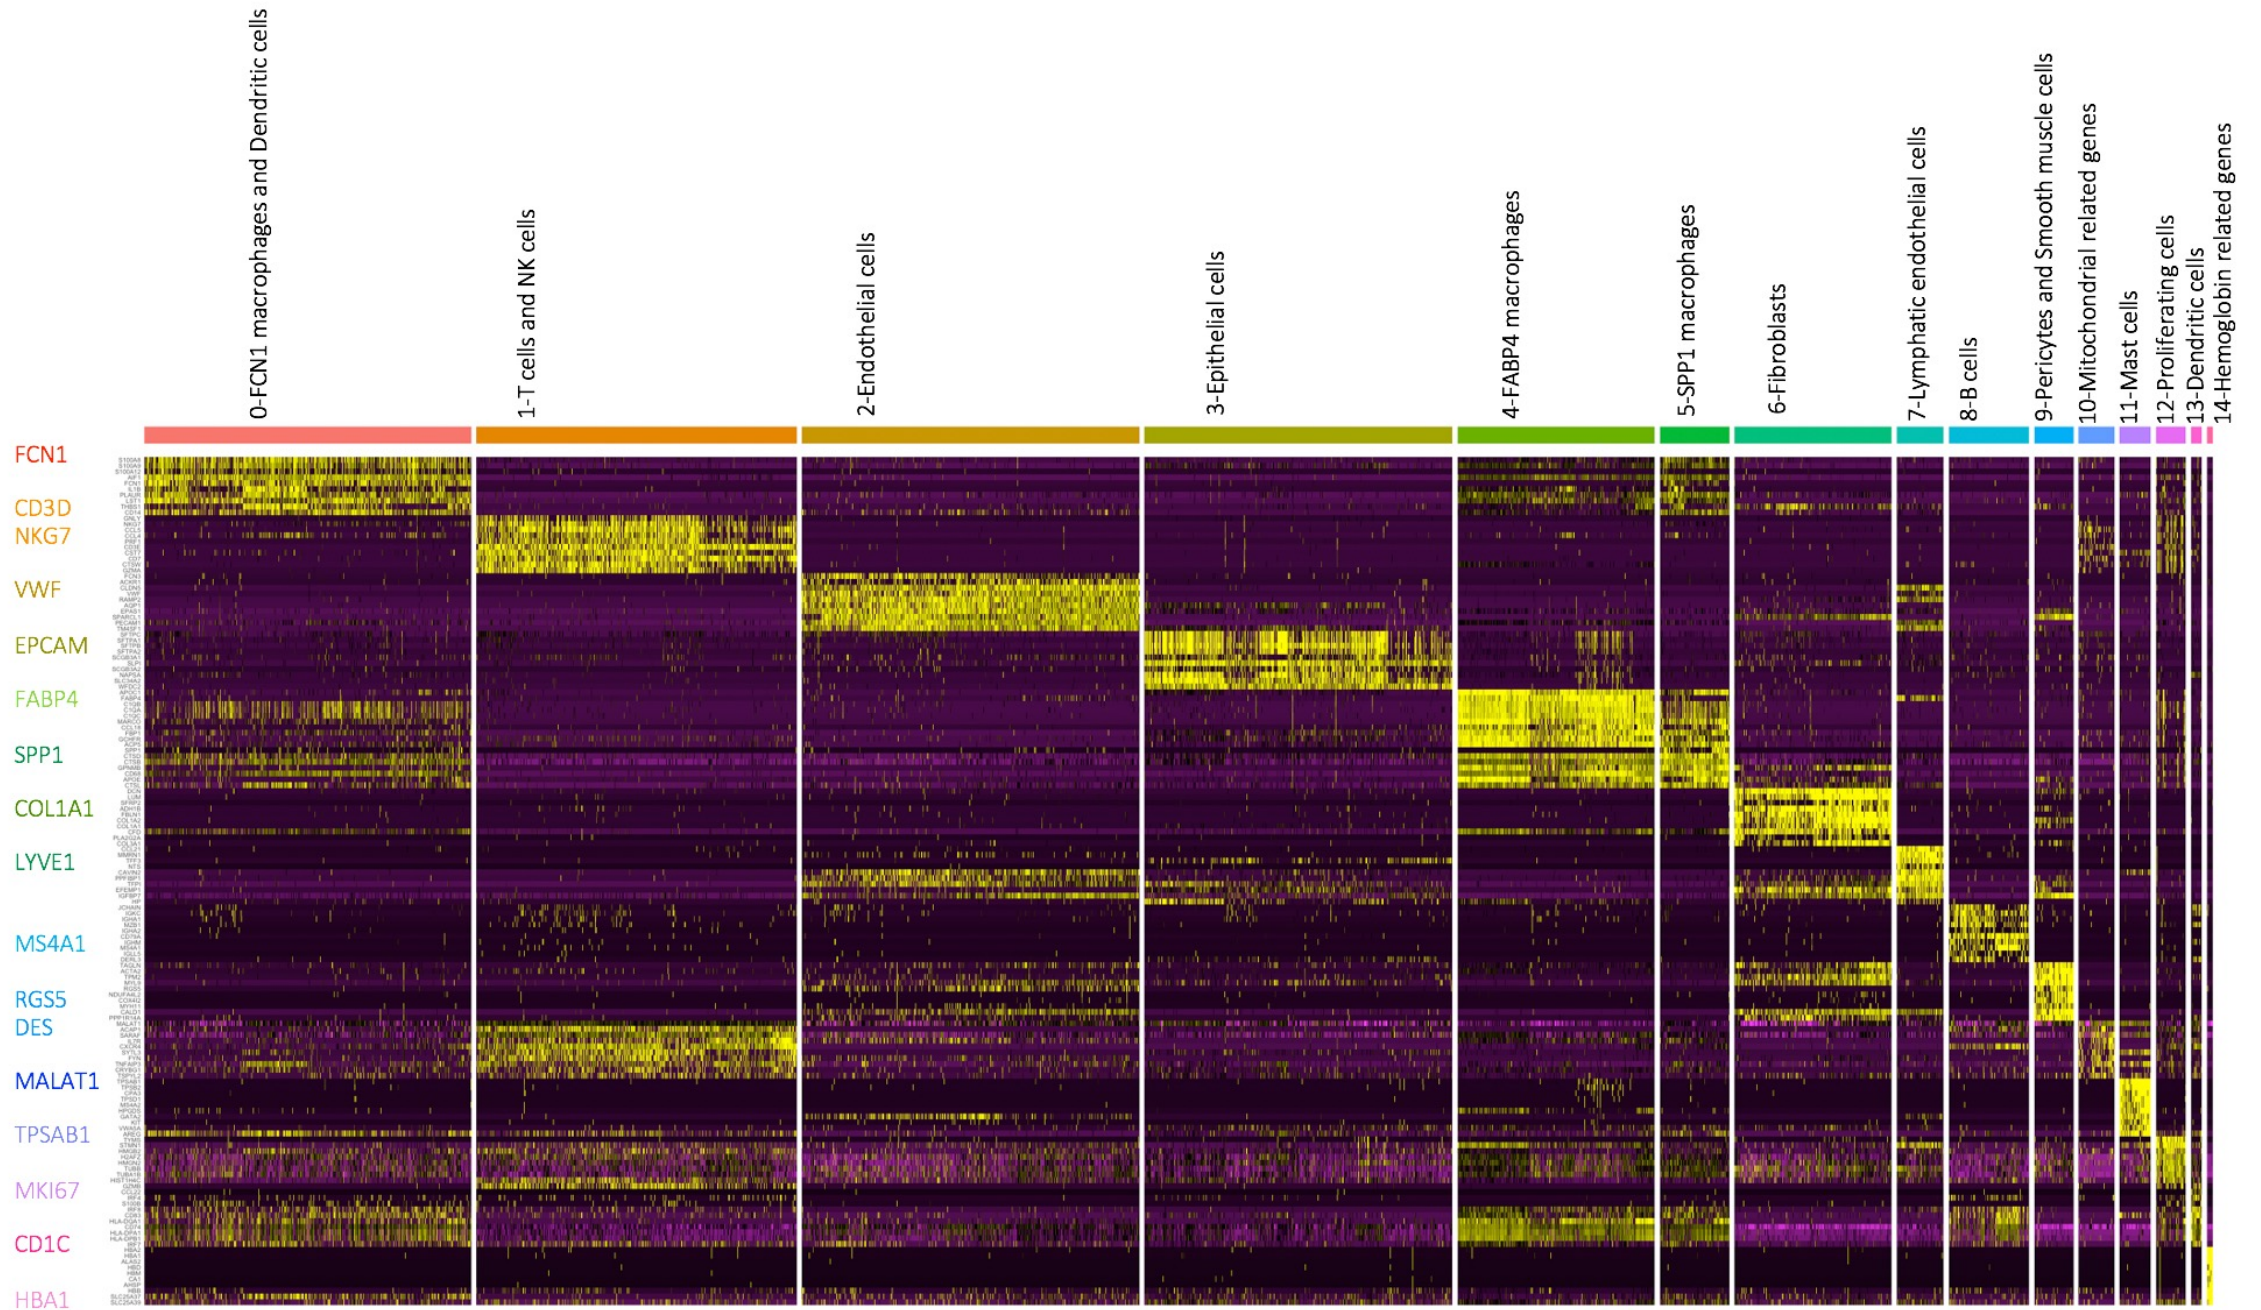

Supplementary Figure 12. Differentiating Genes between SPP1 Mφ and FCN1 Mφ and FABP4 Mφ from 6 lungs in 5' v1 chemistry. *SPP1* and *PLA2G7* are some of the genes included in the list predicted by the software (Seurat, Satija Lab).

| Gene Name | p_val     | avg_logFC  | p_val_adj |
|-----------|-----------|------------|-----------|
| PLA2G7    | 7.65E-163 | 0.67324545 | 2.57E-158 |
| GPNMB     | 1.21E-149 | 1.0804473  | 4.05E-145 |
| SPP1      | 6.56E-143 | 1.99500057 | 2.20E-138 |
| MATK      | 1.80E-125 | 0.37829333 | 6.04E-121 |
| CTSD      | 1.20E-117 | 0.96783973 | 4.04E-113 |
| PMP22     | 5.97E-113 | 0.5615302  | 2.00E-108 |
| CTSB      | 2.53E-112 | 0.77837216 | 8.47E-108 |
| CSTB      | 7.88E-108 | 0.75302663 | 2.64E-103 |
| CD63      | 3.52E-96  | 0.59510584 | 1.18E-91  |
| CCL2      | 1.12E-90  | 1.31801783 | 3.77E-86  |
| DAB2      | 7.17E-88  | 0.49342676 | 2.41E-83  |
| EMP1      | 1.24E-87  | 0.41768143 | 4.17E-83  |
| TREM2     | 1.34E-87  | 0.78370618 | 4.49E-83  |
| NPC2      | 1.01E-84  | 0.47150944 | 3.40E-80  |
| LAMP1     | 2.42E-79  | 0.55574508 | 8.12E-75  |
| CTSA      | 1.11E-78  | 0.50475862 | 3.74E-74  |
| OTOA      | 4.97E-77  | 0.40792275 | 1.67E-72  |
| ATP6V1F   | 7.26E-76  | 0.42065777 | 2.44E-71  |
| FCGR2B    | 1.76E-75  | 0.3862756  | 5.90E-71  |
| ACP5      | 5.64E-75  | 0.618868   | 1.89E-70  |
| HM13      | 3.16E-74  | 0.4397216  | 1.06E-69  |
| LHFPL2    | 4.53E-74  | 0.34128348 | 1.52E-69  |
| CD68      | 1.82E-73  | 0.48546651 | 6.10E-69  |
| PDXK      | 1.13E-69  | 0.34096117 | 3.79E-65  |

Supplementary Figure 13. Clustering of macrophages only from 6 lungs in 5' v1 chemistry as per health status and individual identity. Split DotPlot of macrophage subpopulations gene markers expression indicates *SPP1*, *MERTK* and *LGMN* upregulation in the SSc-ILD SPP1 M $\phi$ .

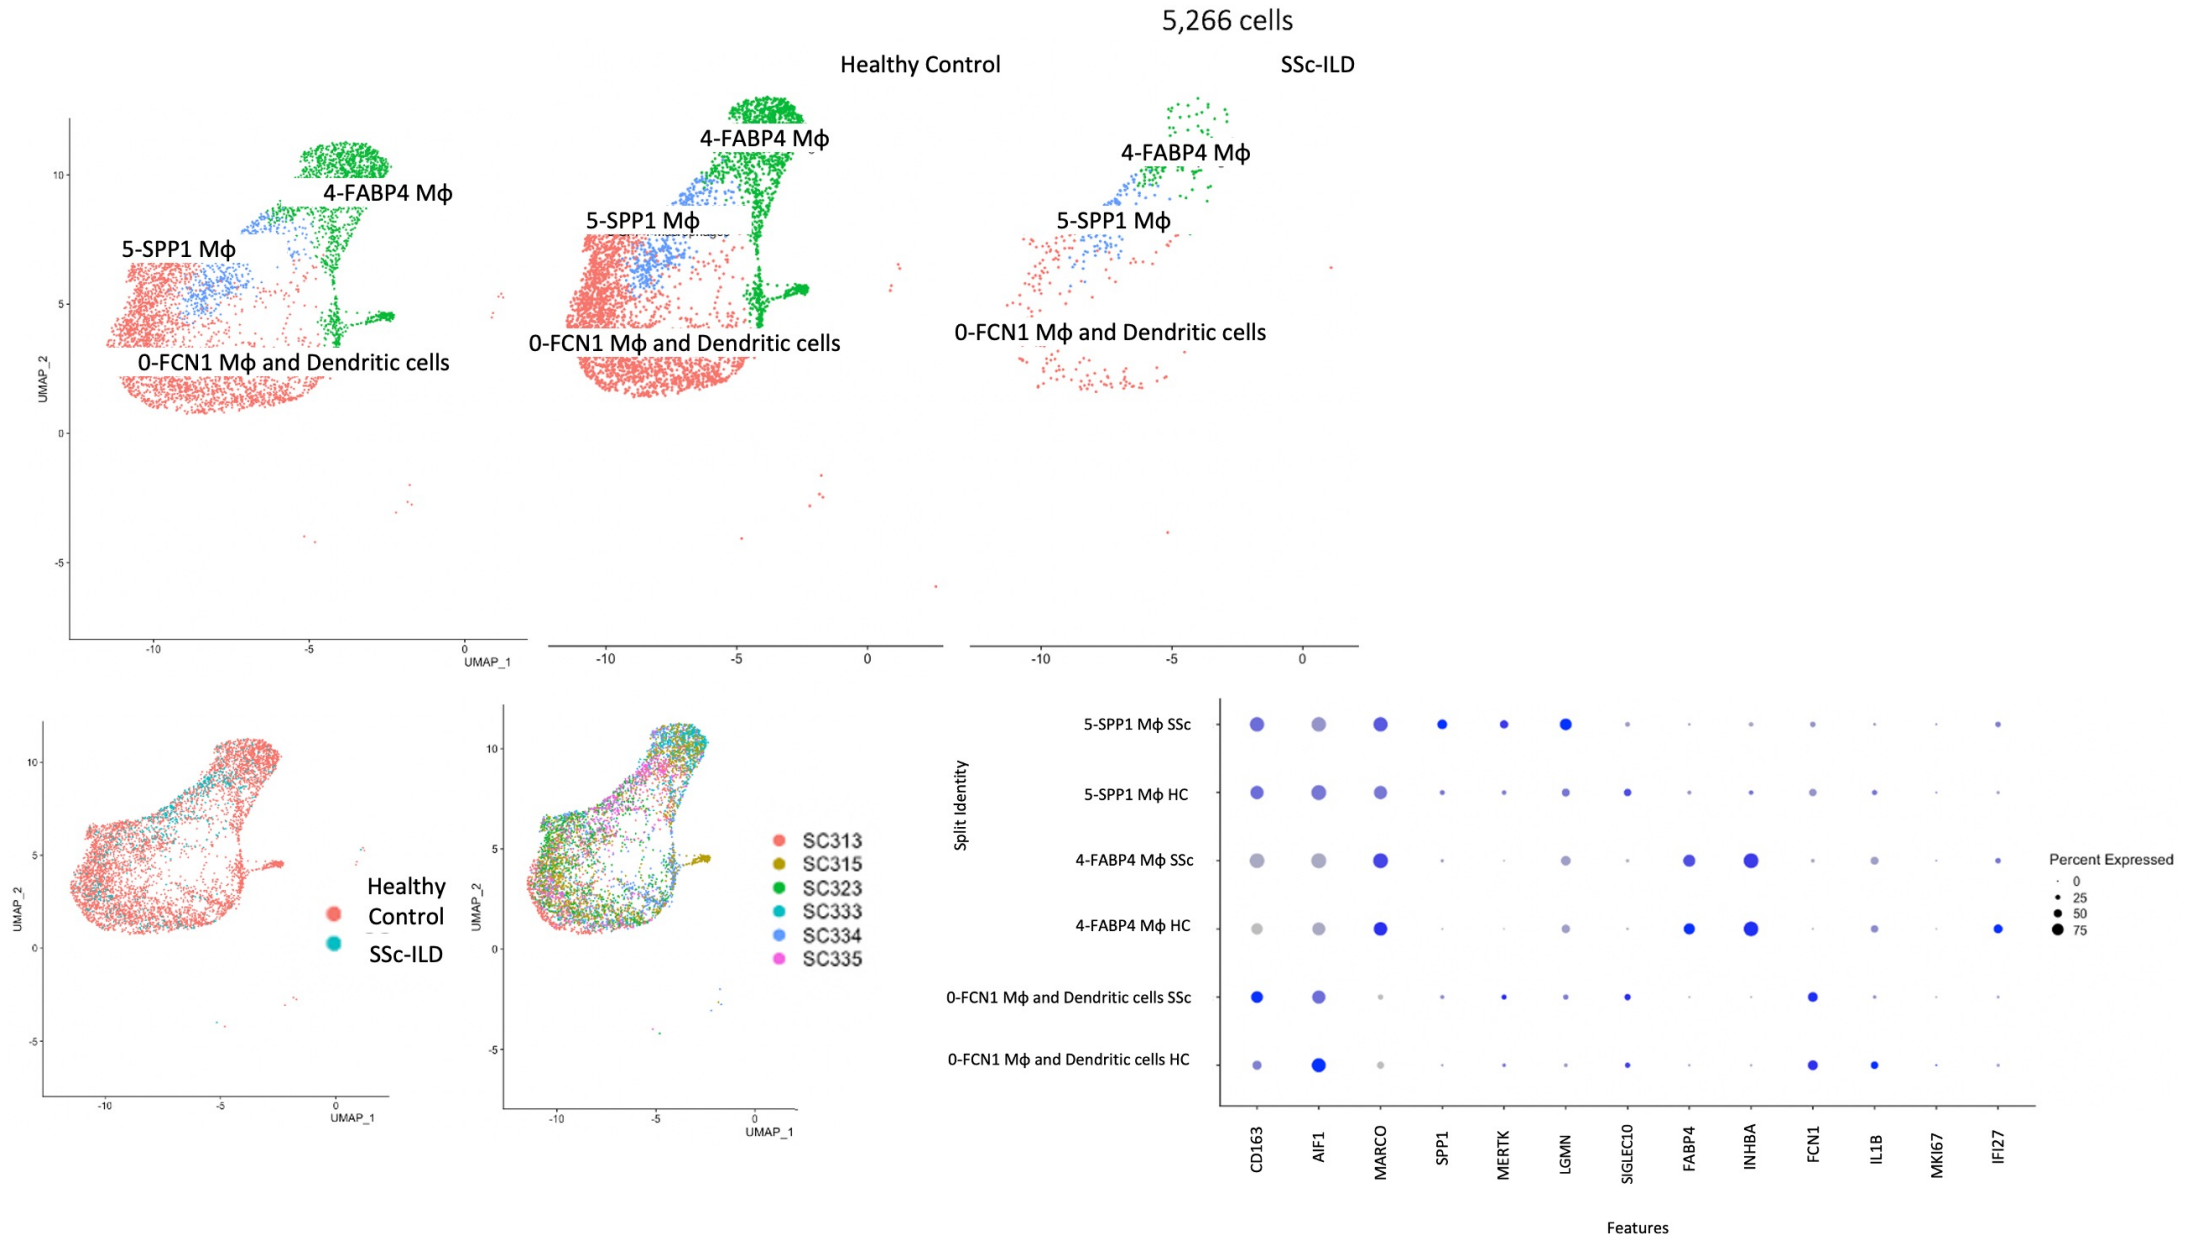

Supplementary Figure 14. Single-cell RNA-sequencing analysis of 30 lung samples in 3' v3 and v2 chemistry as well as 5' v1 and v2 chemistry (17 SSc-ILD and 13 HC). (A) Visualization of clustering by UMAP per cell type. (B) Visualization of clustering by UMAP per individual identity. (C) Visualization of clustering by UMAP per health status. SPP1 macrophages cluster 1 is formed primarily of macrophages from the SSc-ILD patients.

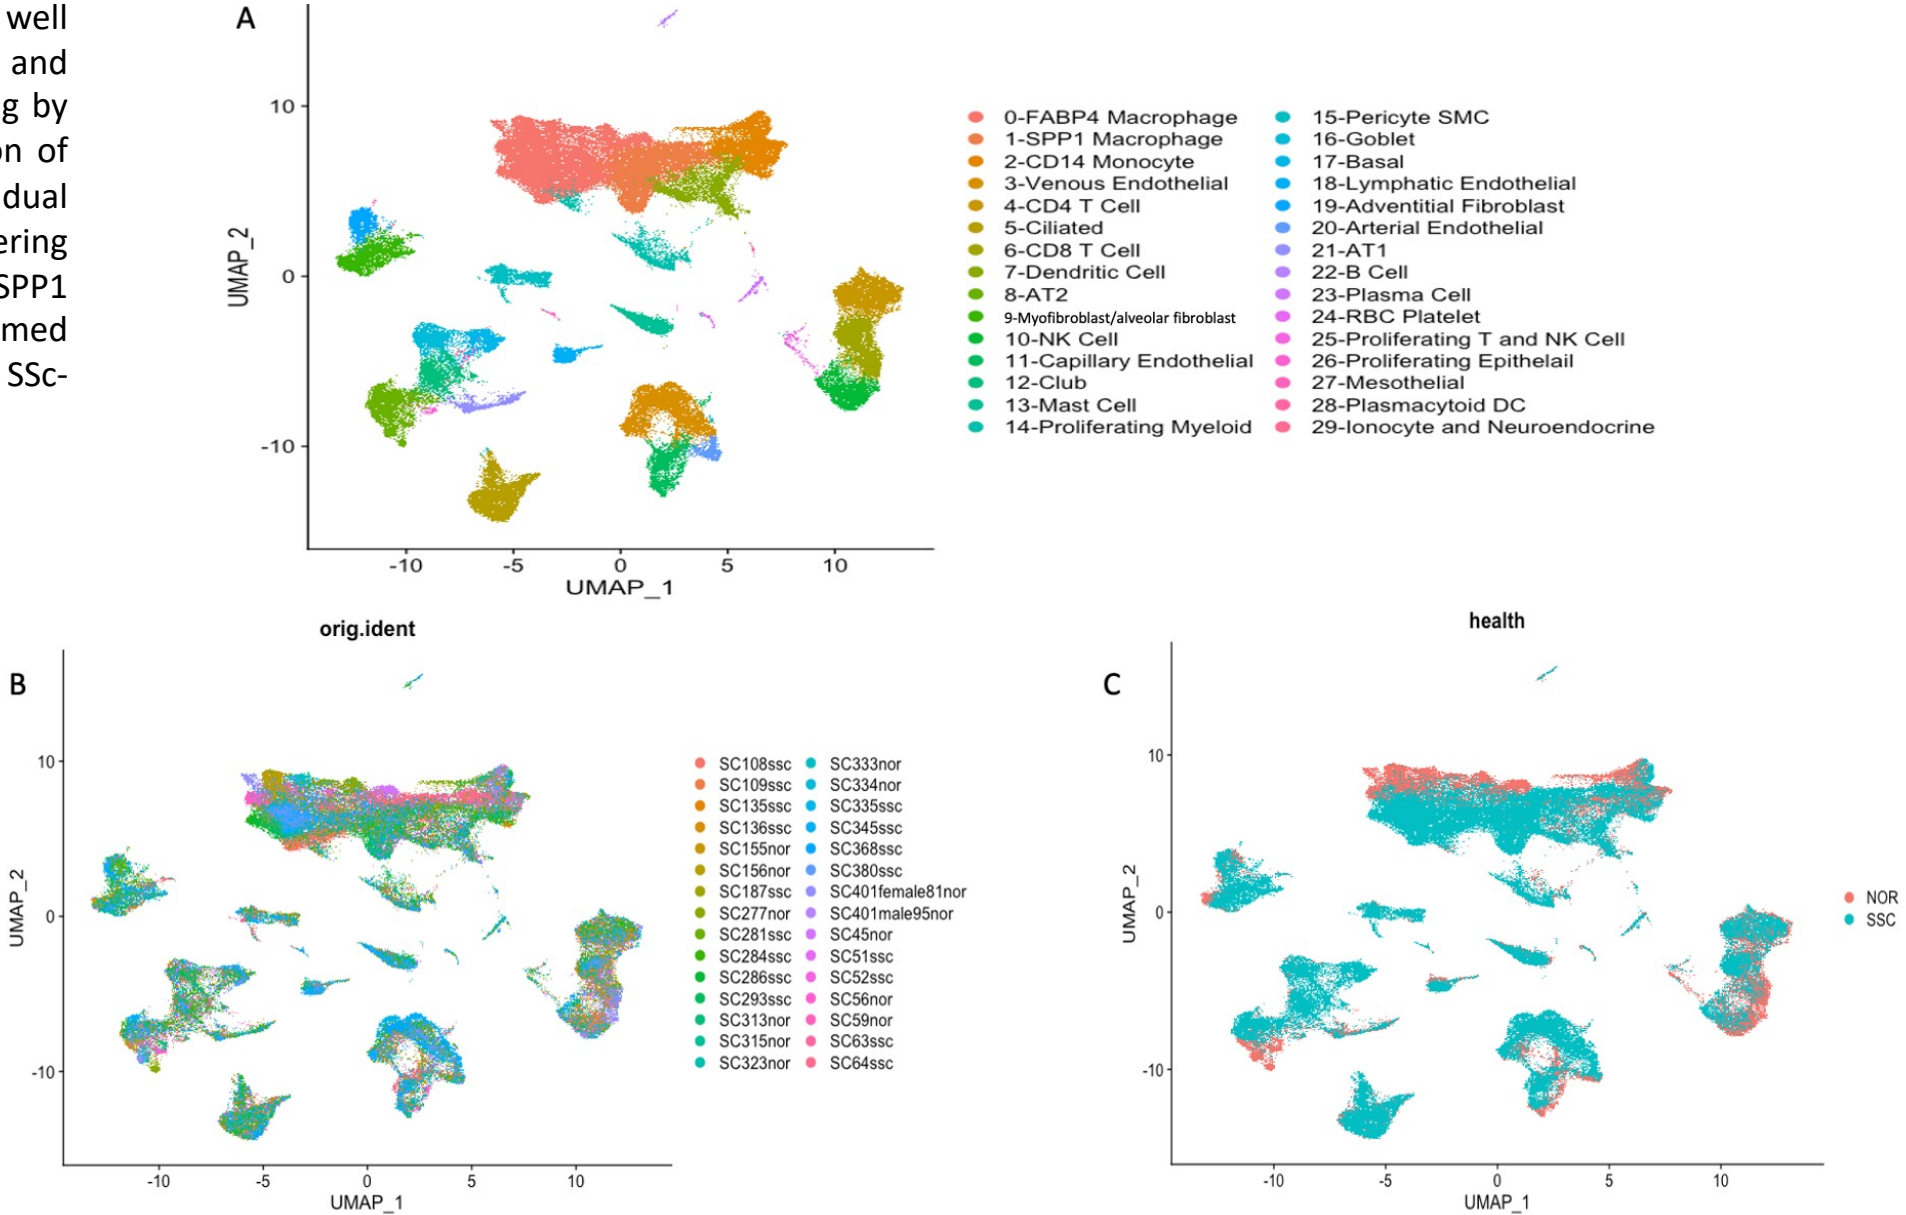

Supplementary Figure 15.  
 Single-cell RNA-sequencing  
 analysis of 30 lung samples  
 in 3' v3 and v2 chemistry  
 as well as 5' v1 and v2  
 chemistry (17 SSc-ILD and  
 13 HC). Visualization of  
 gene expression by split  
 DotPlot of macrophage  
 subpopulation markers,  
 dendritic cells,  
 proliferating cells and  
 other interesting genes.

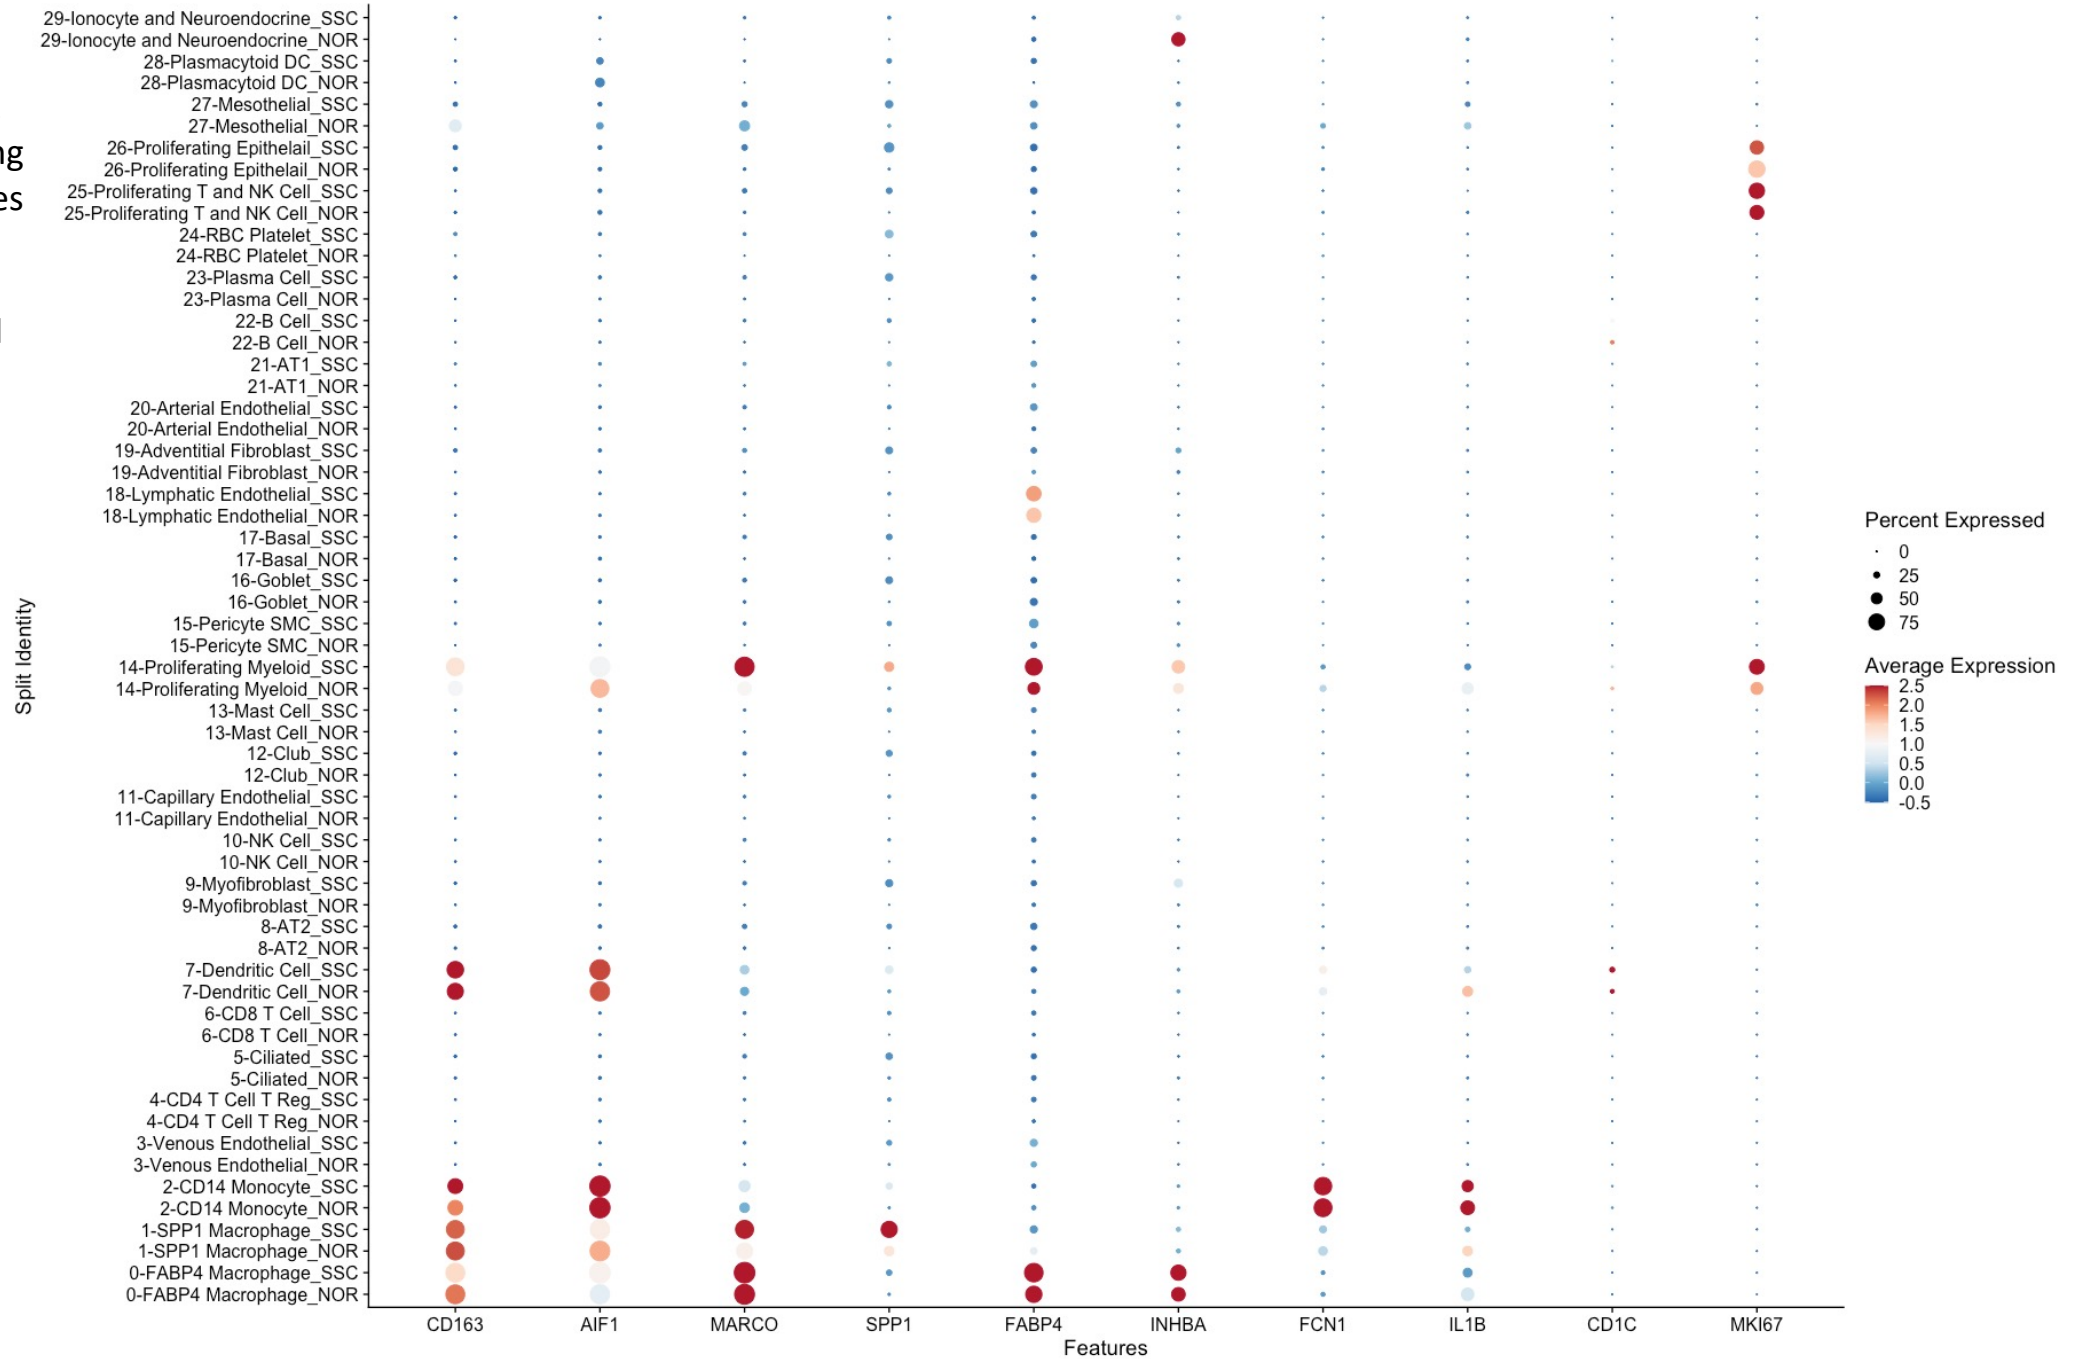

Supplementary Figure 16. Single-cell RNA-sequencing analysis of 30 lung samples in 3' v3 and v2 chemistry as well as 5' v1 and v2 chemistry (17 SSC-ILD and 13 HC). Visualization of gene expression by FeaturePlot of macrophage subpopulation markers, dendritic cells, proliferating cells and other interesting genes.

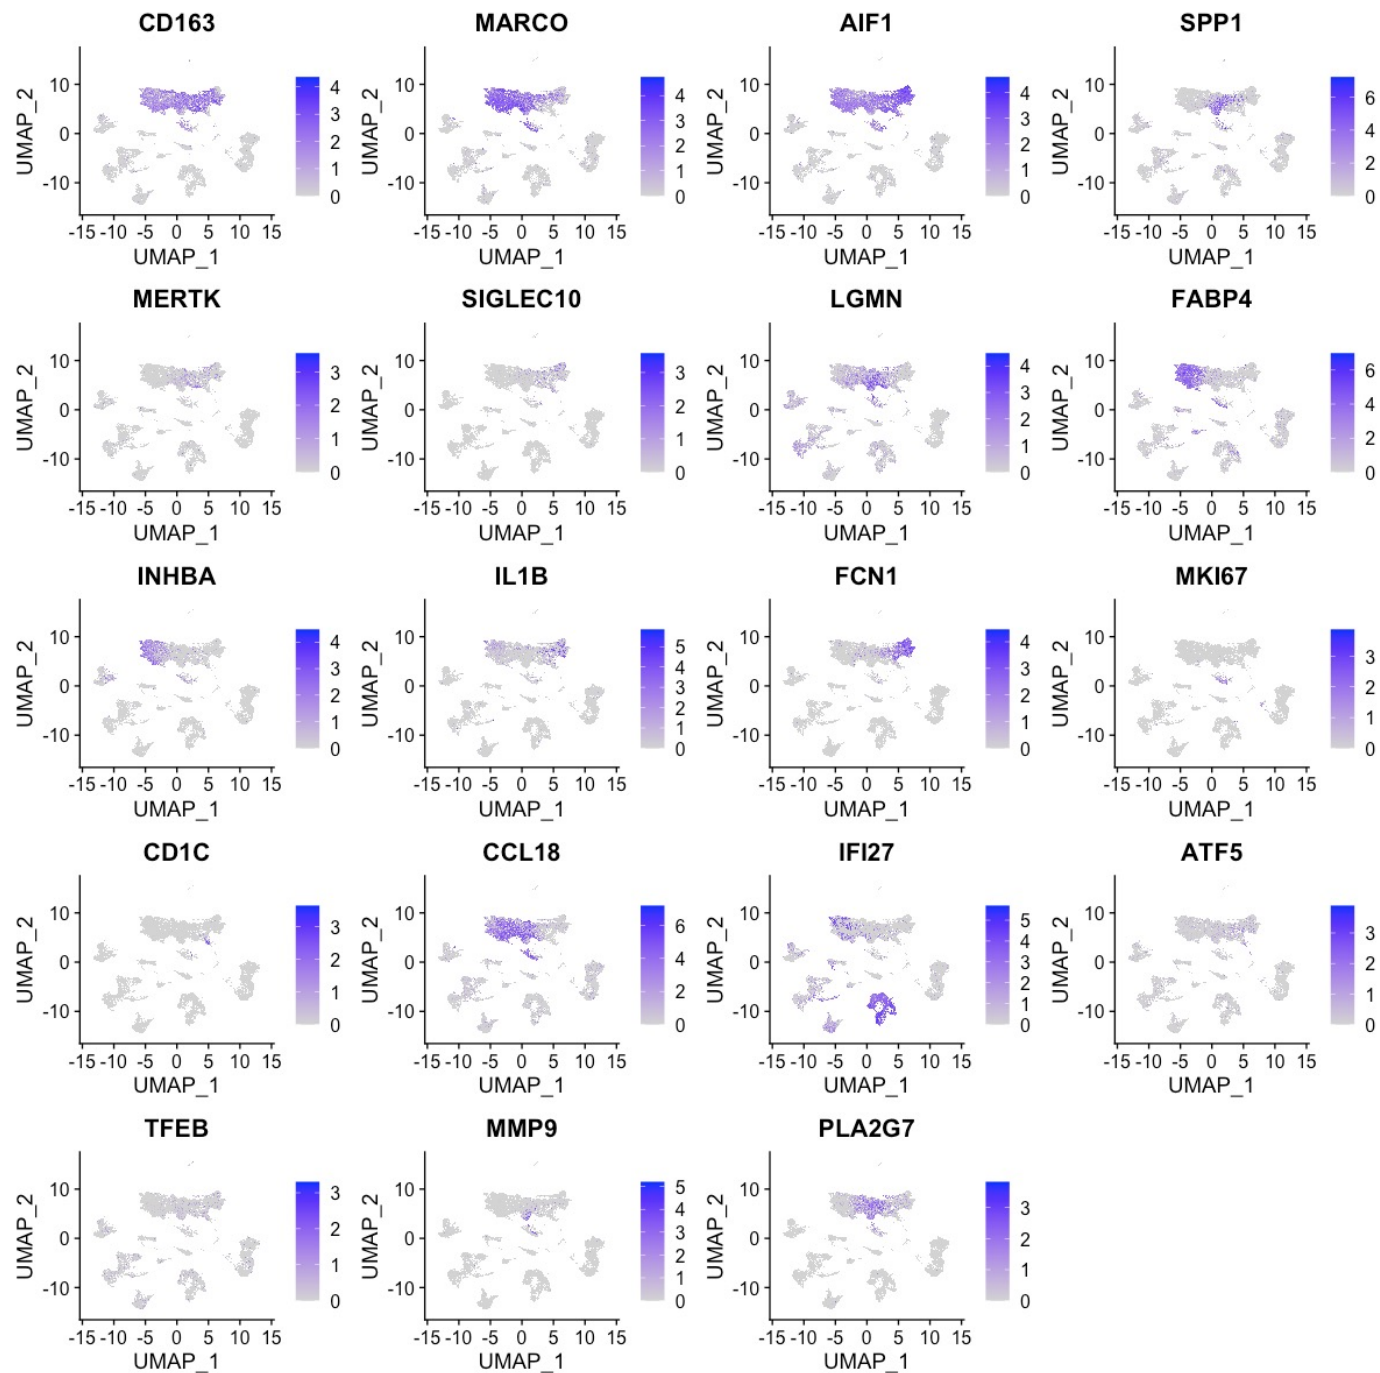



Supplementary Figure 17. Single-cell RNA-sequencing analysis of macrophage subpopulations, dendritic cells, monocytes, proliferating cells from 30 lung samples in 3' v3 and v2 chemistry as well as 5' v1 and v2 chemistry (17 SSc-ILD and 13 HC). (A) Visualization of clustering by UMAP per cell type. (B) Visualization of clustering by UMAP per individual identity. (C) Visualization of clustering by UMAP per health status. SPP1 macrophages cluster 1 is formed primarily of macrophages from the SSc-ILD patients.

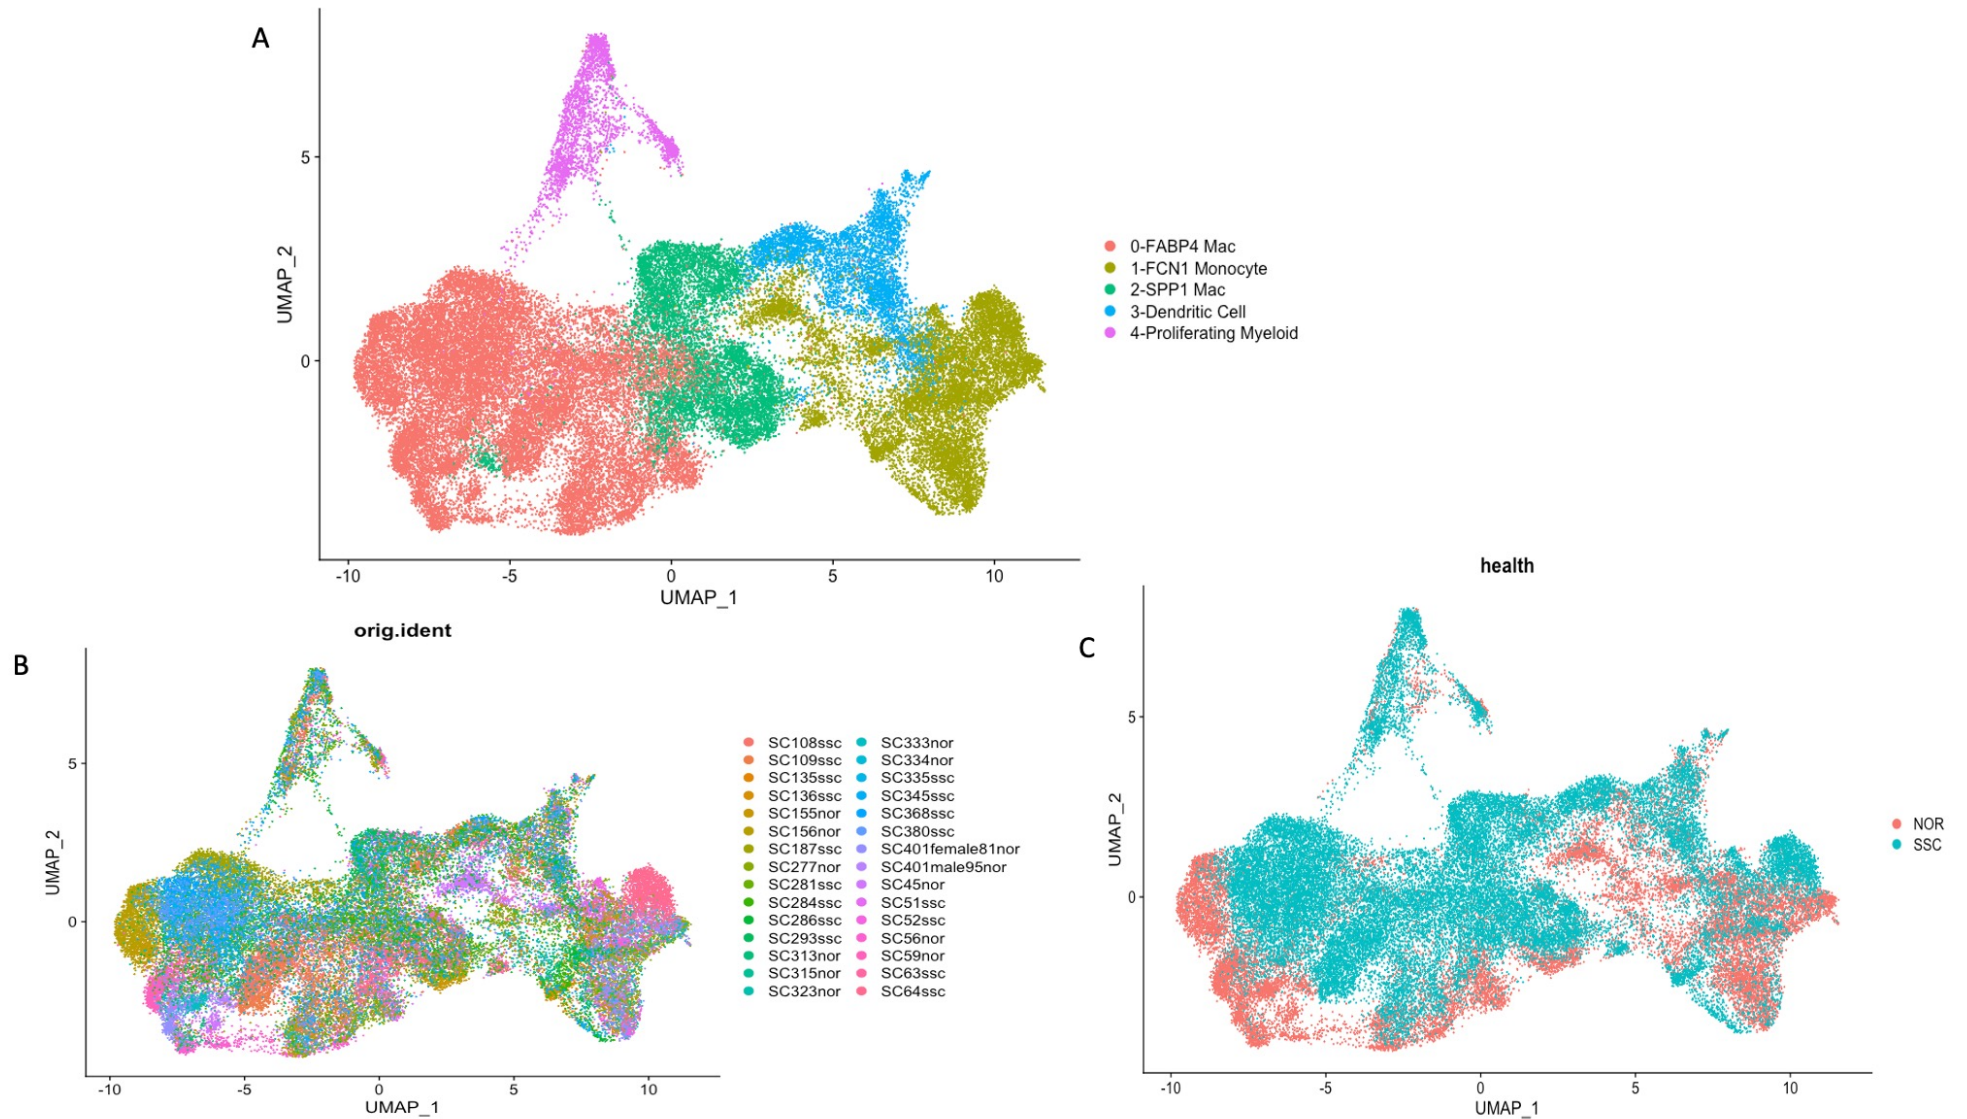

Supplementary Figure 18. Single-cell RNA-sequencing analysis of macrophage subpopulations, dendritic cells, monocytes, proliferating cells from 30 lung samples in 3' v3 and v2 chemistry as well as 5' v1 and v2 chemistry (17 SSc-ILD and 13 HC). Visualization of gene expression by FeaturePlot of macrophage subpopulation markers, dendritic cells, proliferating cells and other interesting genes.

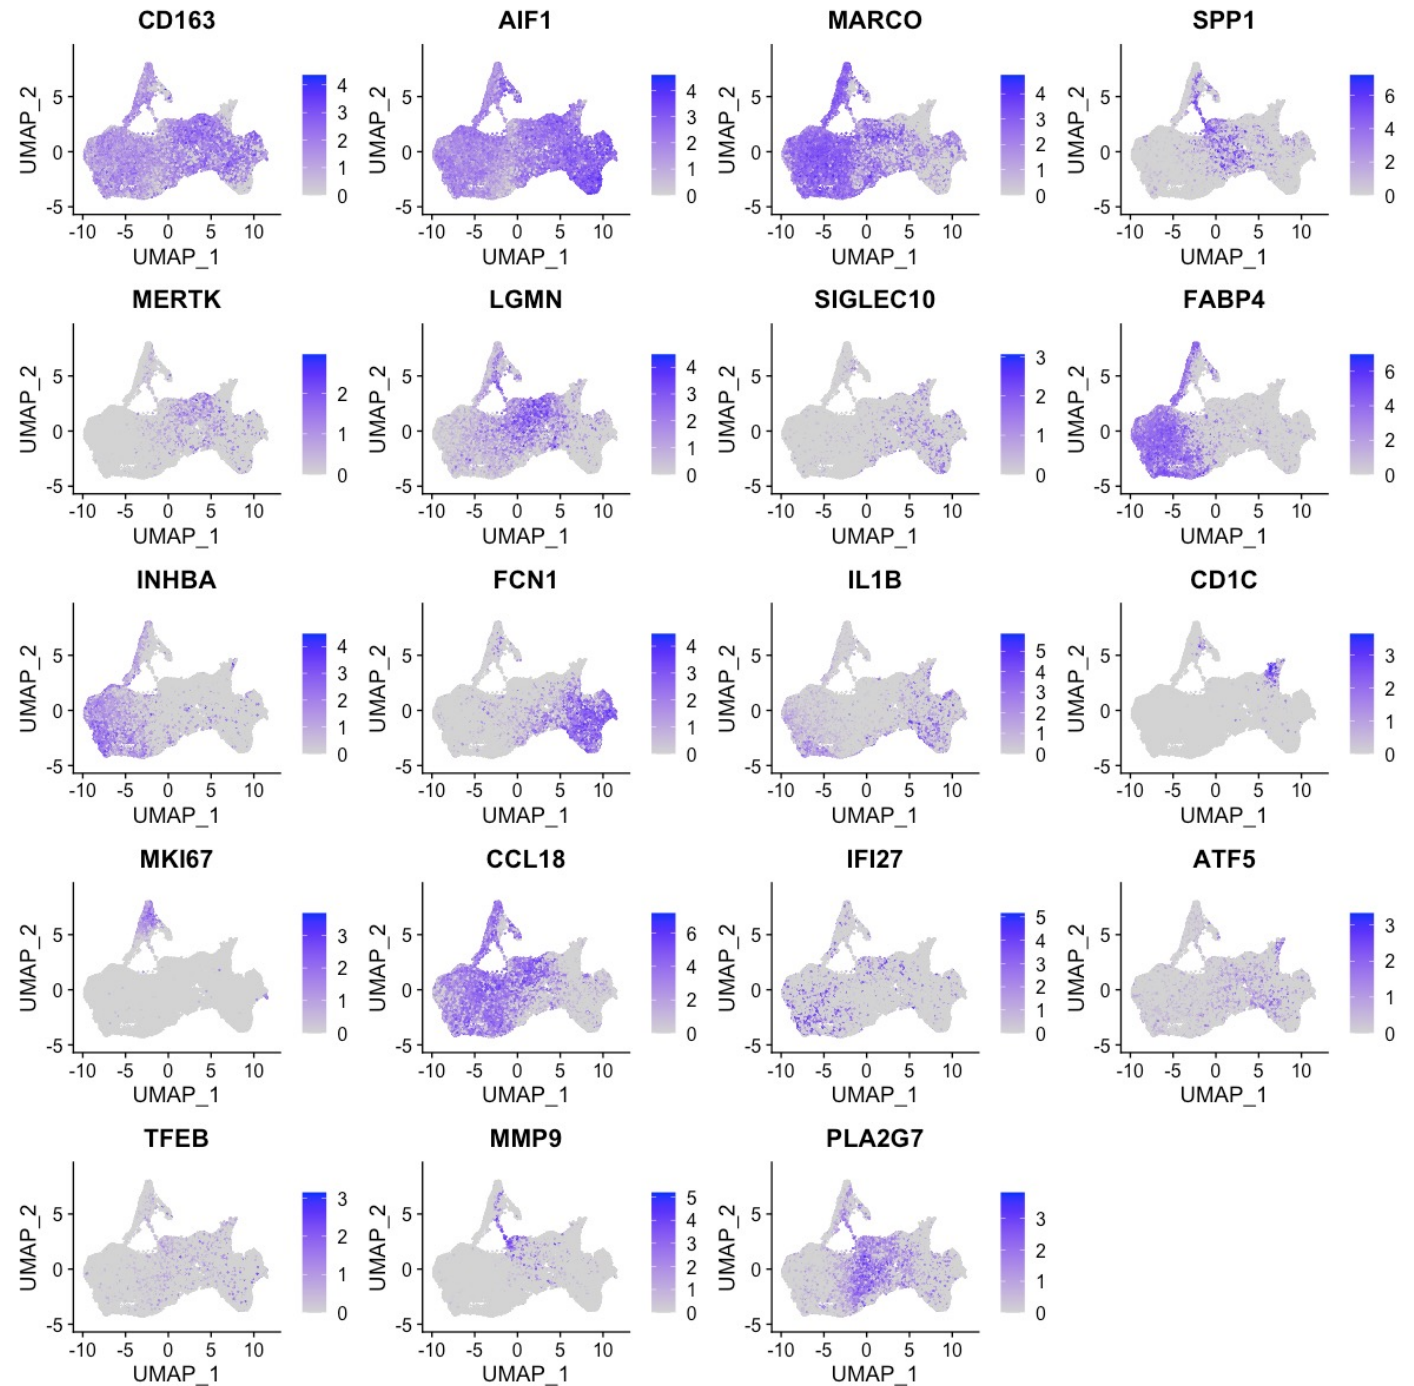

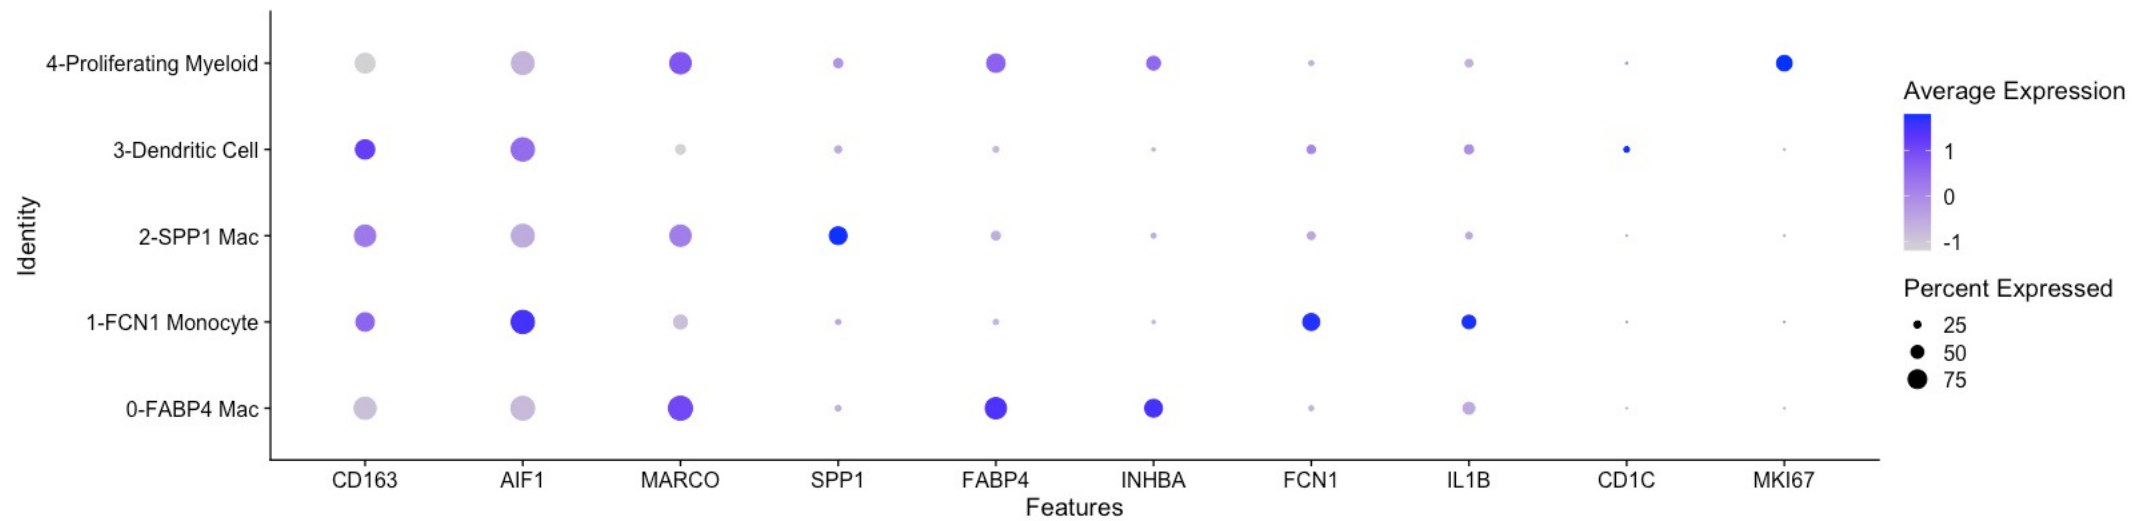

Supplementary Figure 19. Single-cell RNA-sequencing analysis of macrophage subpopulations, dendritic cells, monocytes, proliferating cells from 30 lung samples in 3' v3 and v2 chemistry as well as 5' v1 and v2 chemistry (17 SSc-ILD and 13 HC). Visualization of gene expression by DotPlot of macrophage subpopulation markers, dendritic cells, proliferating cells and other interesting genes.

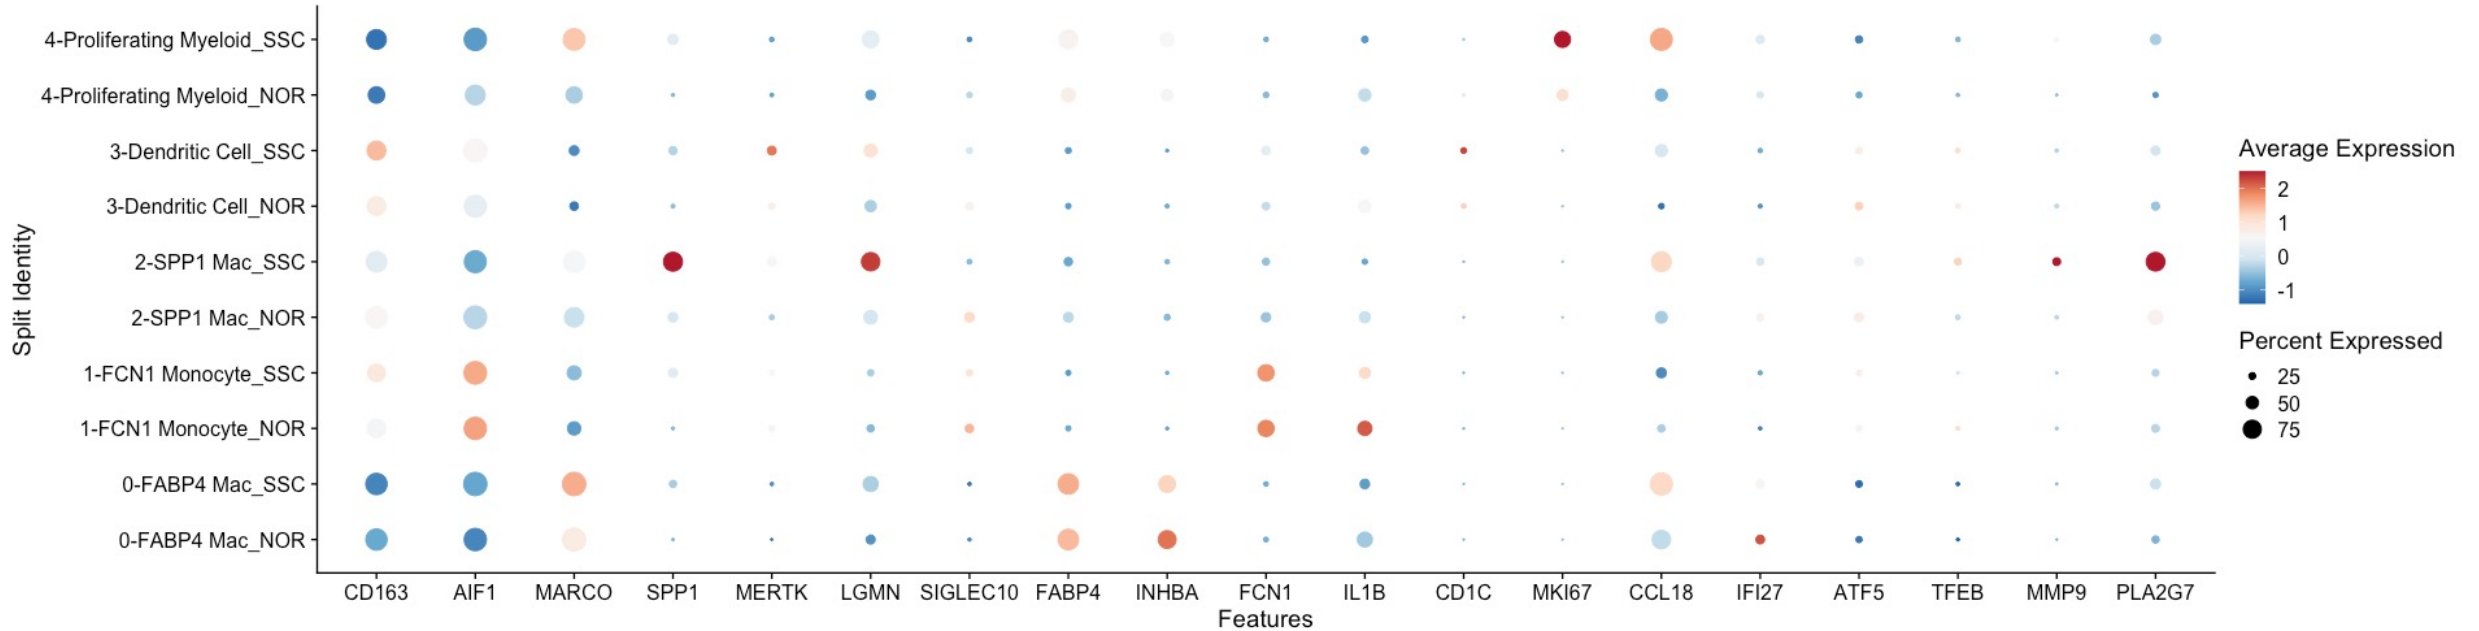

Supplementary Figure 20. Single-cell RNA-sequencing analysis of macrophage subpopulations, dendritic cells, monocytes, proliferating cells from 30 lung samples in 3' v3 and v2 chemistry as well as 5' v1 and v2 chemistry (17 SSc-ILD and 13 HC). Visualization of gene expression by split DotPlot of macrophage subpopulation markers, dendritic cells, proliferating cells and other interesting genes.

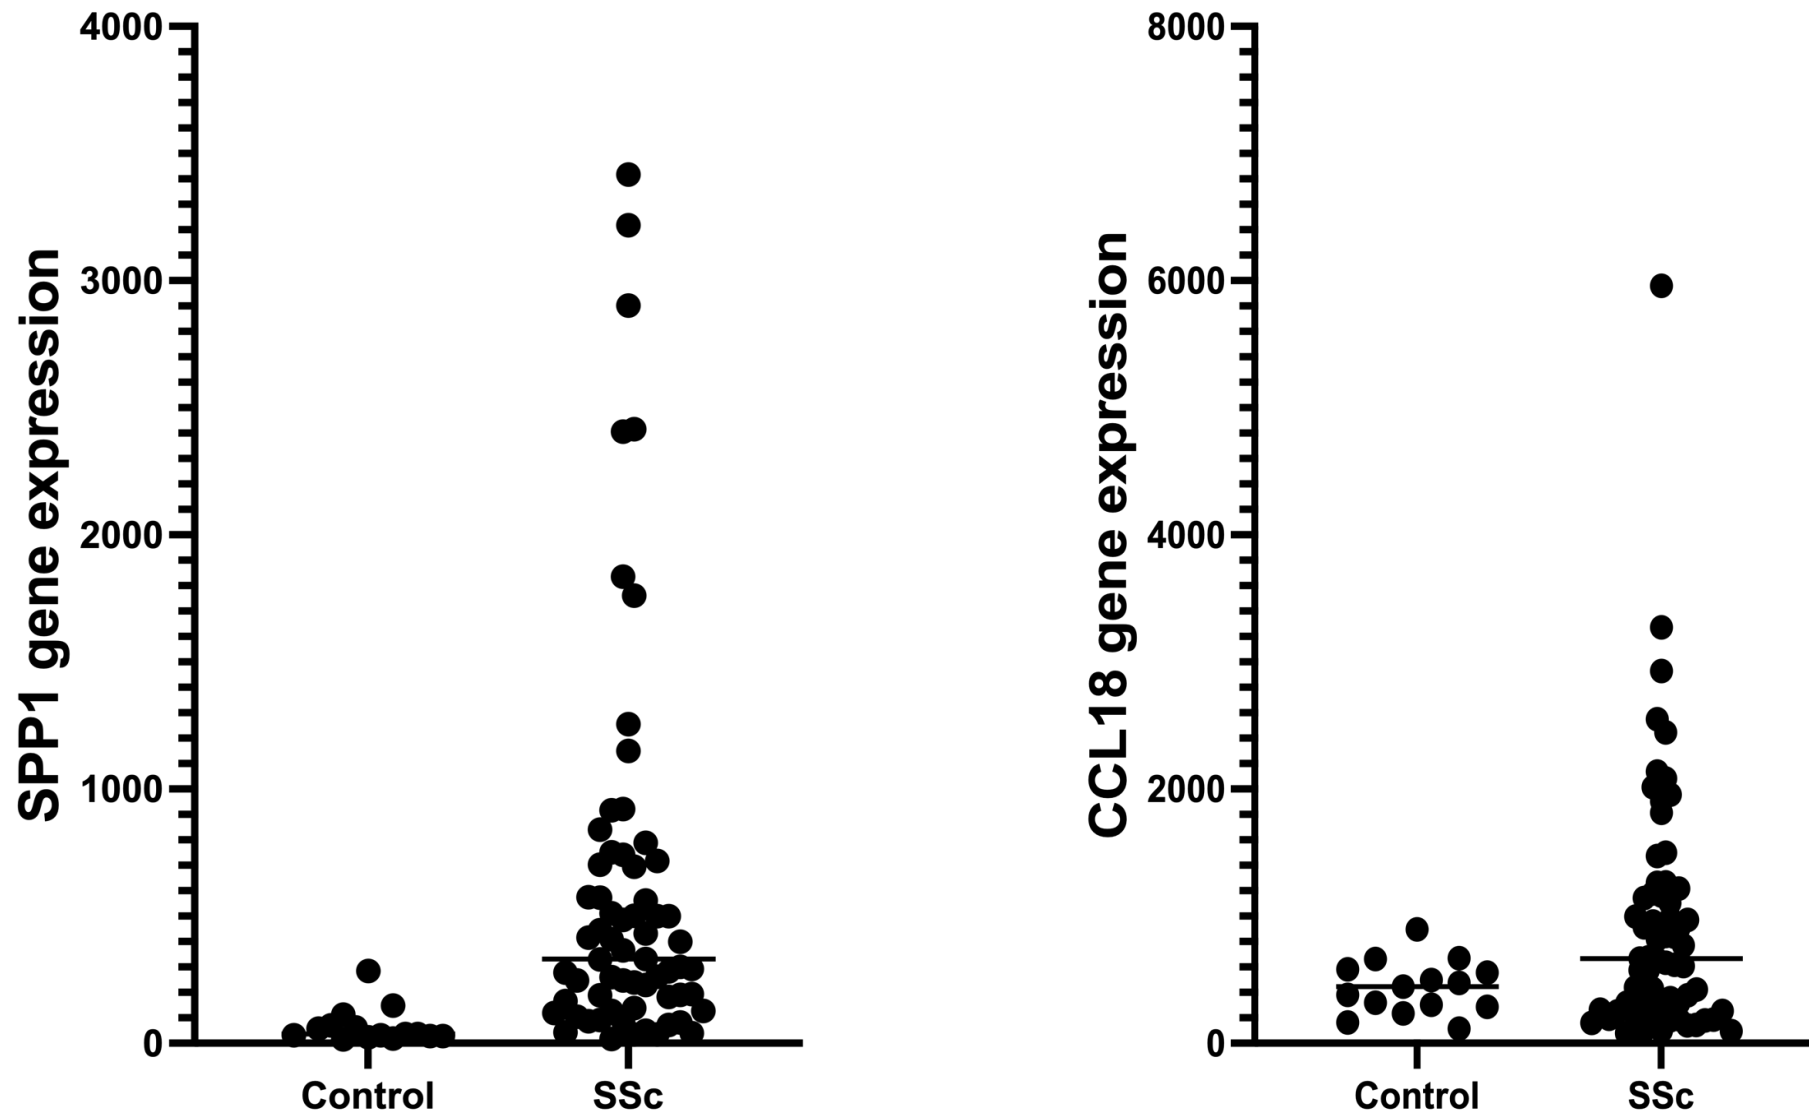

Supplementary Figure 21. Bulk gene expression of *SPP1* and *CCL18* in skin from patients with SSc (n=65) compared to healthy controls (n=15),  $p < 0.005$  for both.

Supplementary Figure 22. Average expression of *SPP1* in SSc and control skin cell populations

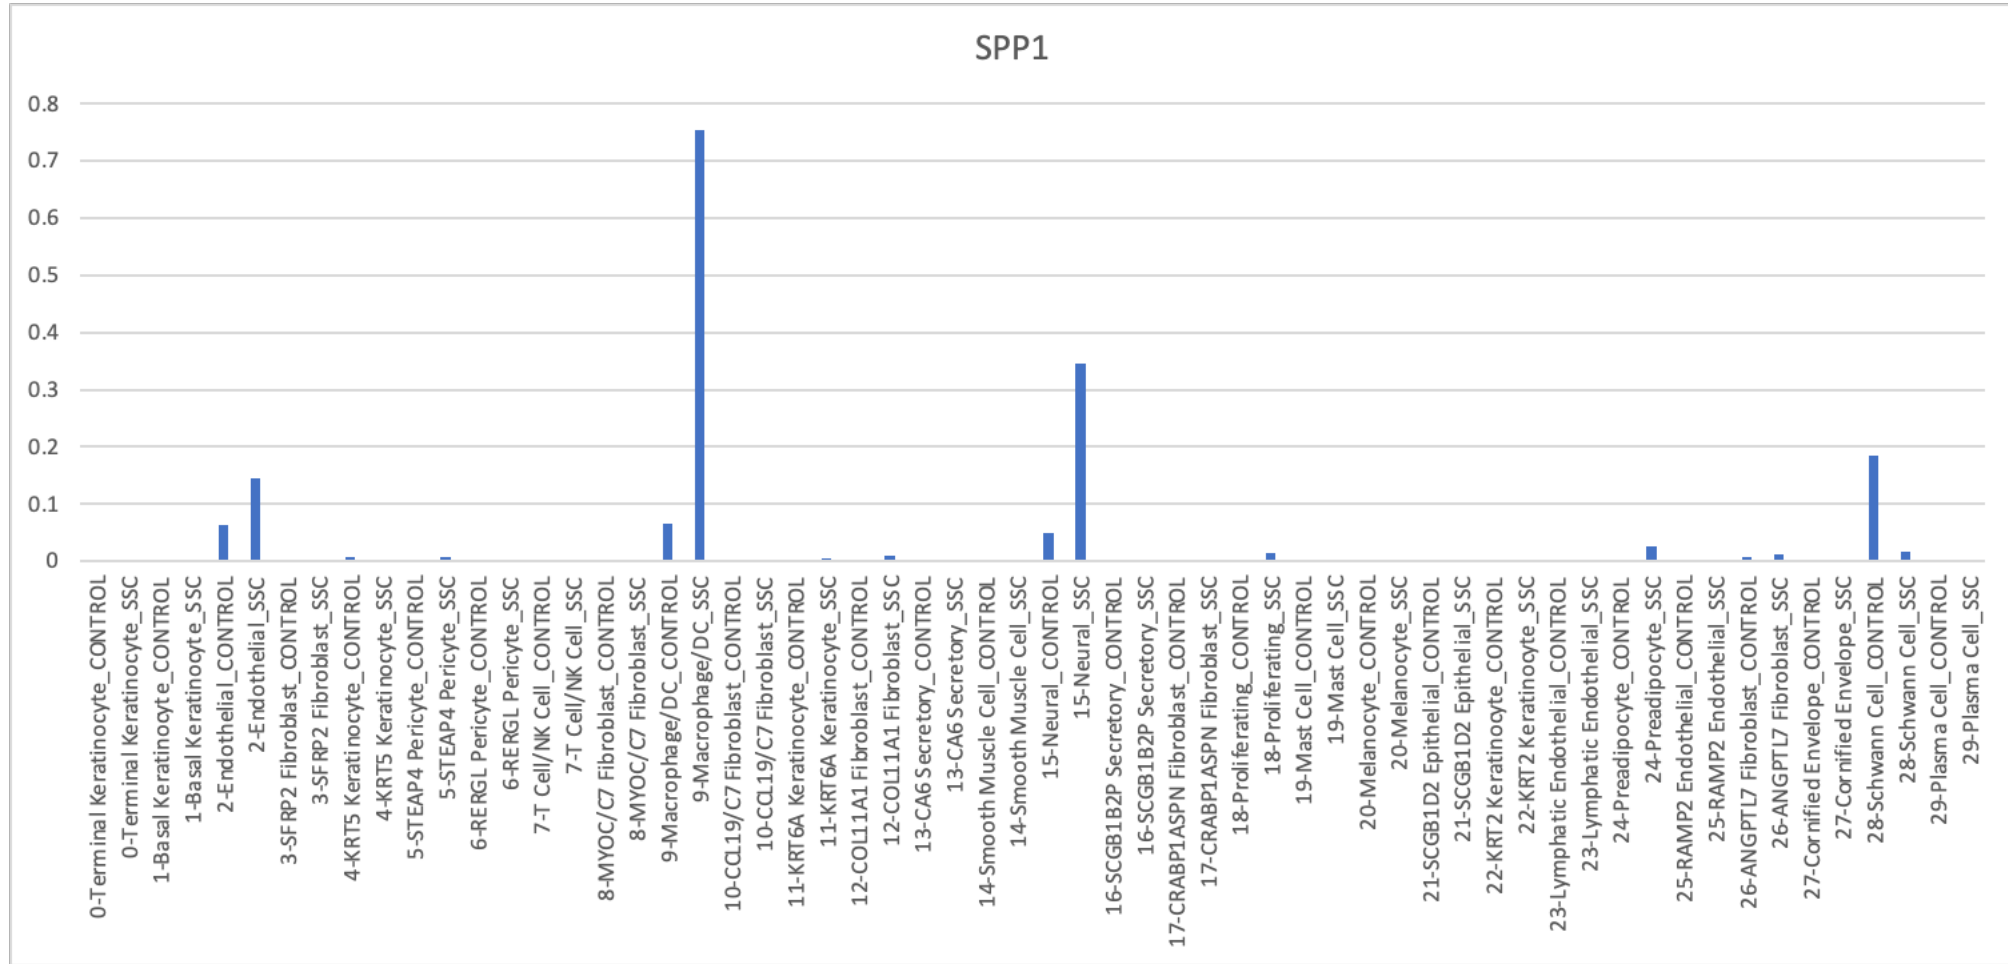

Supplementary Figure 23. Average expression of *CCL18* in SSc and control skin cell populations

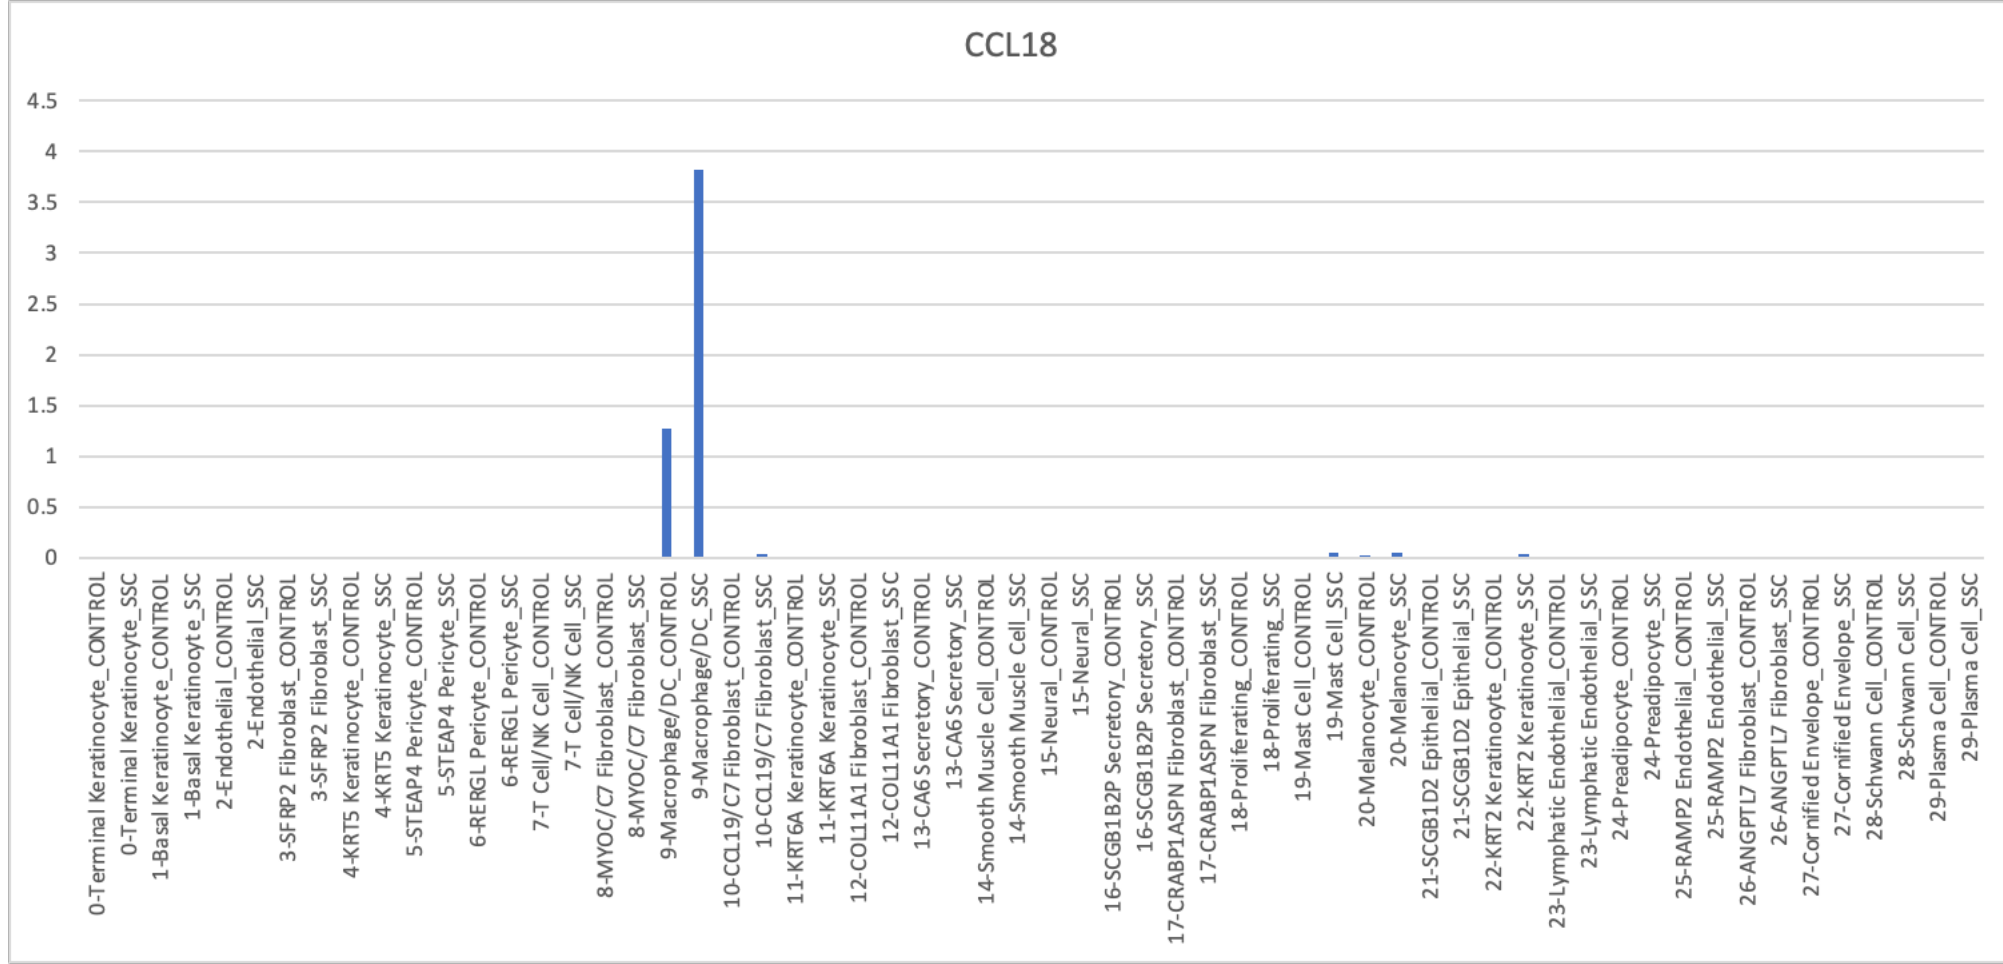

Supplementary Figure 24. Dot Plot of transcription factor ATF5 target genes expression for SPP1 Mφ in cell types from SC293 SSc-ILD lung sample using scRNA-sequencing 3' v3 Chemistry. ATF5 target genes include *SPP1* and were predicted using SCENIC software. *MMP9* is upregulated in SPP1 Mφ.

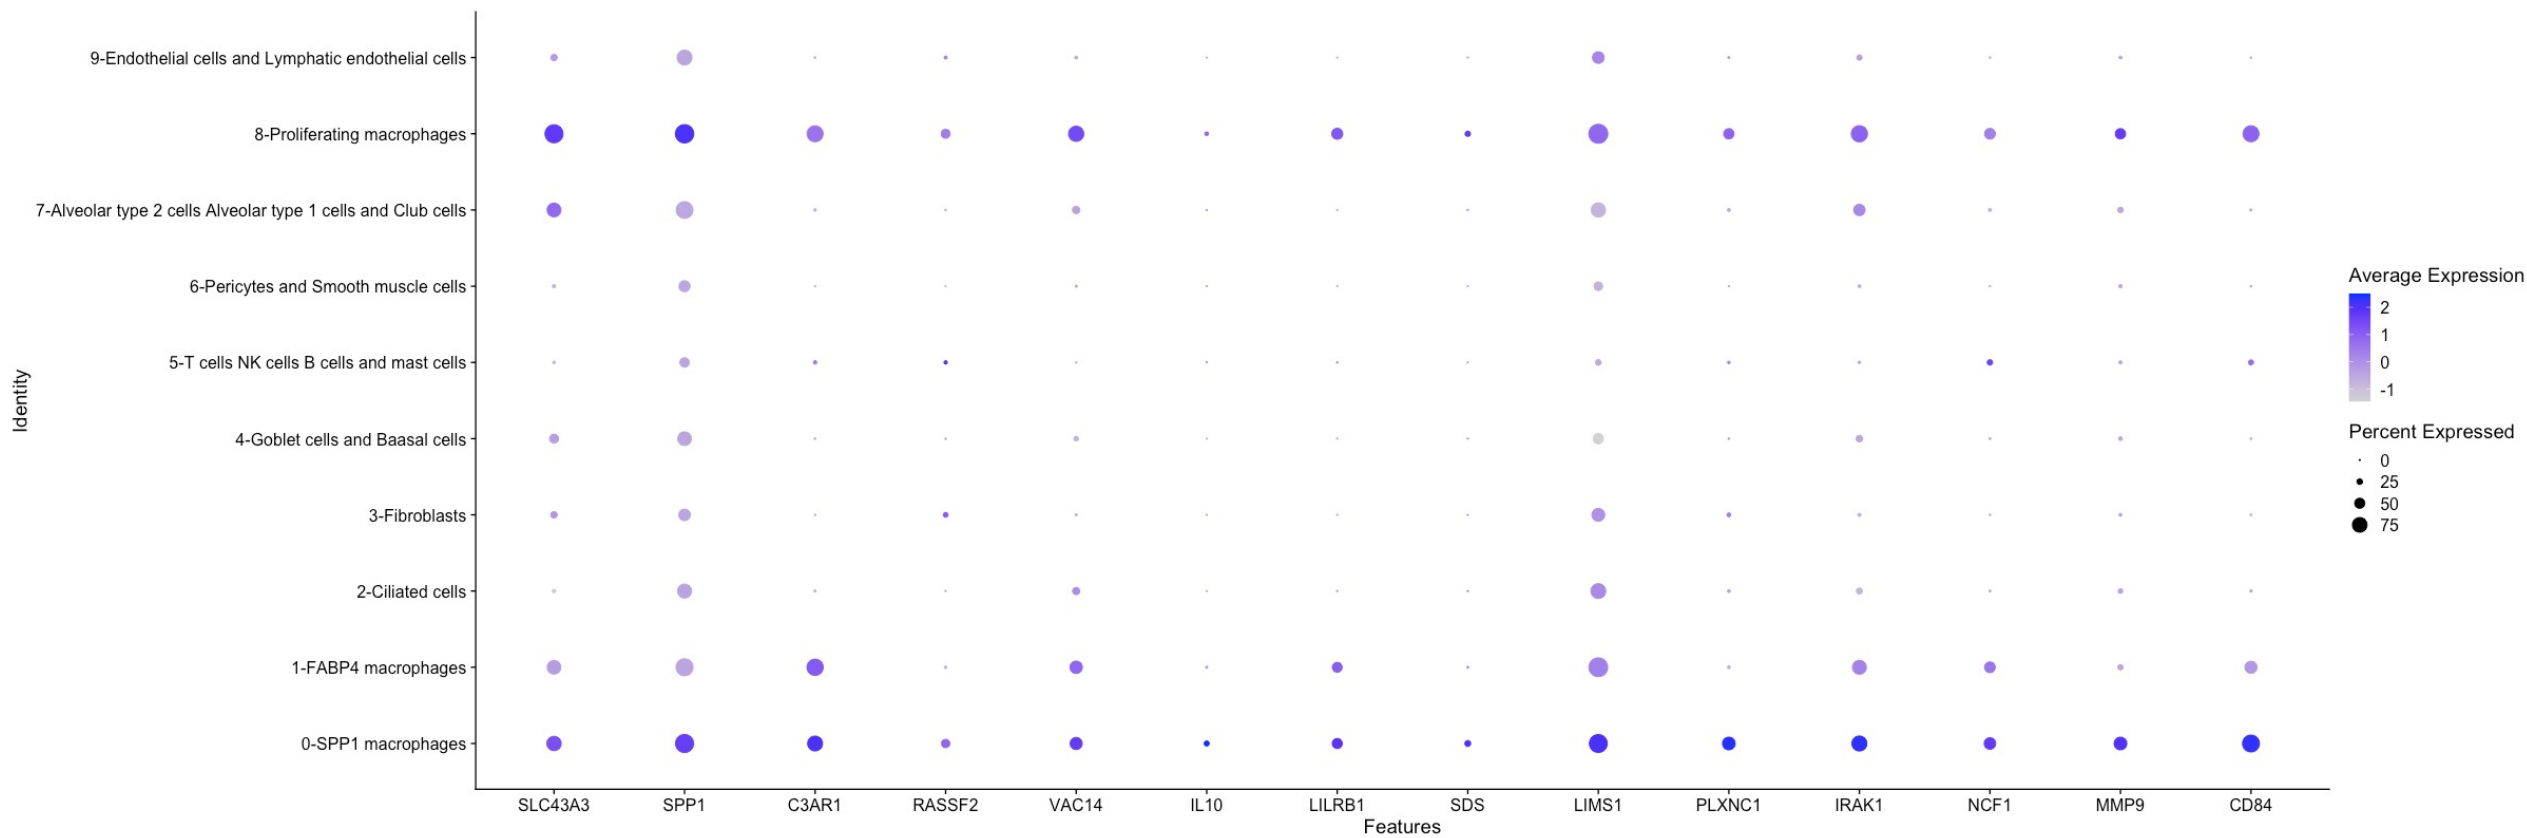



Supplementary Figure 25.

Transcription factors important for SPP1 Mφ with respective target genes as predicted by SCENIC software. *SPP1* and *MMP9* are target genes for transcription factors ATF5, TFEB, ZNF219, SREBF1, BCL11A, ETV5. The rest of the target genes are included in the accessible transcription factor motifs when comparing SPP1 Mφ to FABP4 Mφ as predicted by Signac (Satija Lab) and Loupe (10X Genomics) software.

| Transcription Factor | Target Gene |
|----------------------|-------------|
| ATF5                 | SPP1        |
|                      | MMP9        |
| KLF6                 | KLF6        |
| NR1H3                | NR1H3       |
|                      | SREBF1      |
|                      | TFEB        |
| TFEB                 | TFEB        |
|                      | SPP1        |
|                      | NR1H3       |
|                      | KLF6        |
| ZNF219               | ARID3A      |
|                      | MMP9        |
| SREBF1               | KLF6        |
|                      | MAF         |
|                      | BHLHE40     |
|                      | NR1H3       |
|                      | CREB3L2     |
|                      | TFEB        |
|                      | SREBF1      |
|                      | ARID3A      |
|                      | MMP9        |
| BCL11A               | MMP9        |
|                      | SPP1        |
|                      | MITF        |
|                      | NR1H3       |
|                      | BHLHE40     |
|                      | TFEB        |

| Transcription Factor | Target Gene |
|----------------------|-------------|
| CREB3L2              | CREB3L2     |
|                      | MAF         |
| MAFB                 | MAF         |
| BHLHE40              | ARID3A      |
| MITF                 | KLF6        |
|                      | BHLHE40     |
|                      | TFEB        |
| ARID5B               | MAFB        |
|                      | KLF6        |
| ARID3A               | FOSL2       |
|                      | ARID3A      |
| ETV5                 | ETV5        |
|                      | MAF         |
|                      | SPP1        |
|                      | MMP9        |
|                      | BHLHE40     |
|                      | MAFB        |
|                      | TFEB        |
| ATF6                 | ATF6        |
|                      | CREB3L2     |
| FOXN3                | MITF        |
|                      | TFEB        |
|                      | CREB3L2     |
|                      | ARID3A      |
| JUN                  | JUN         |
|                      | KLF6        |

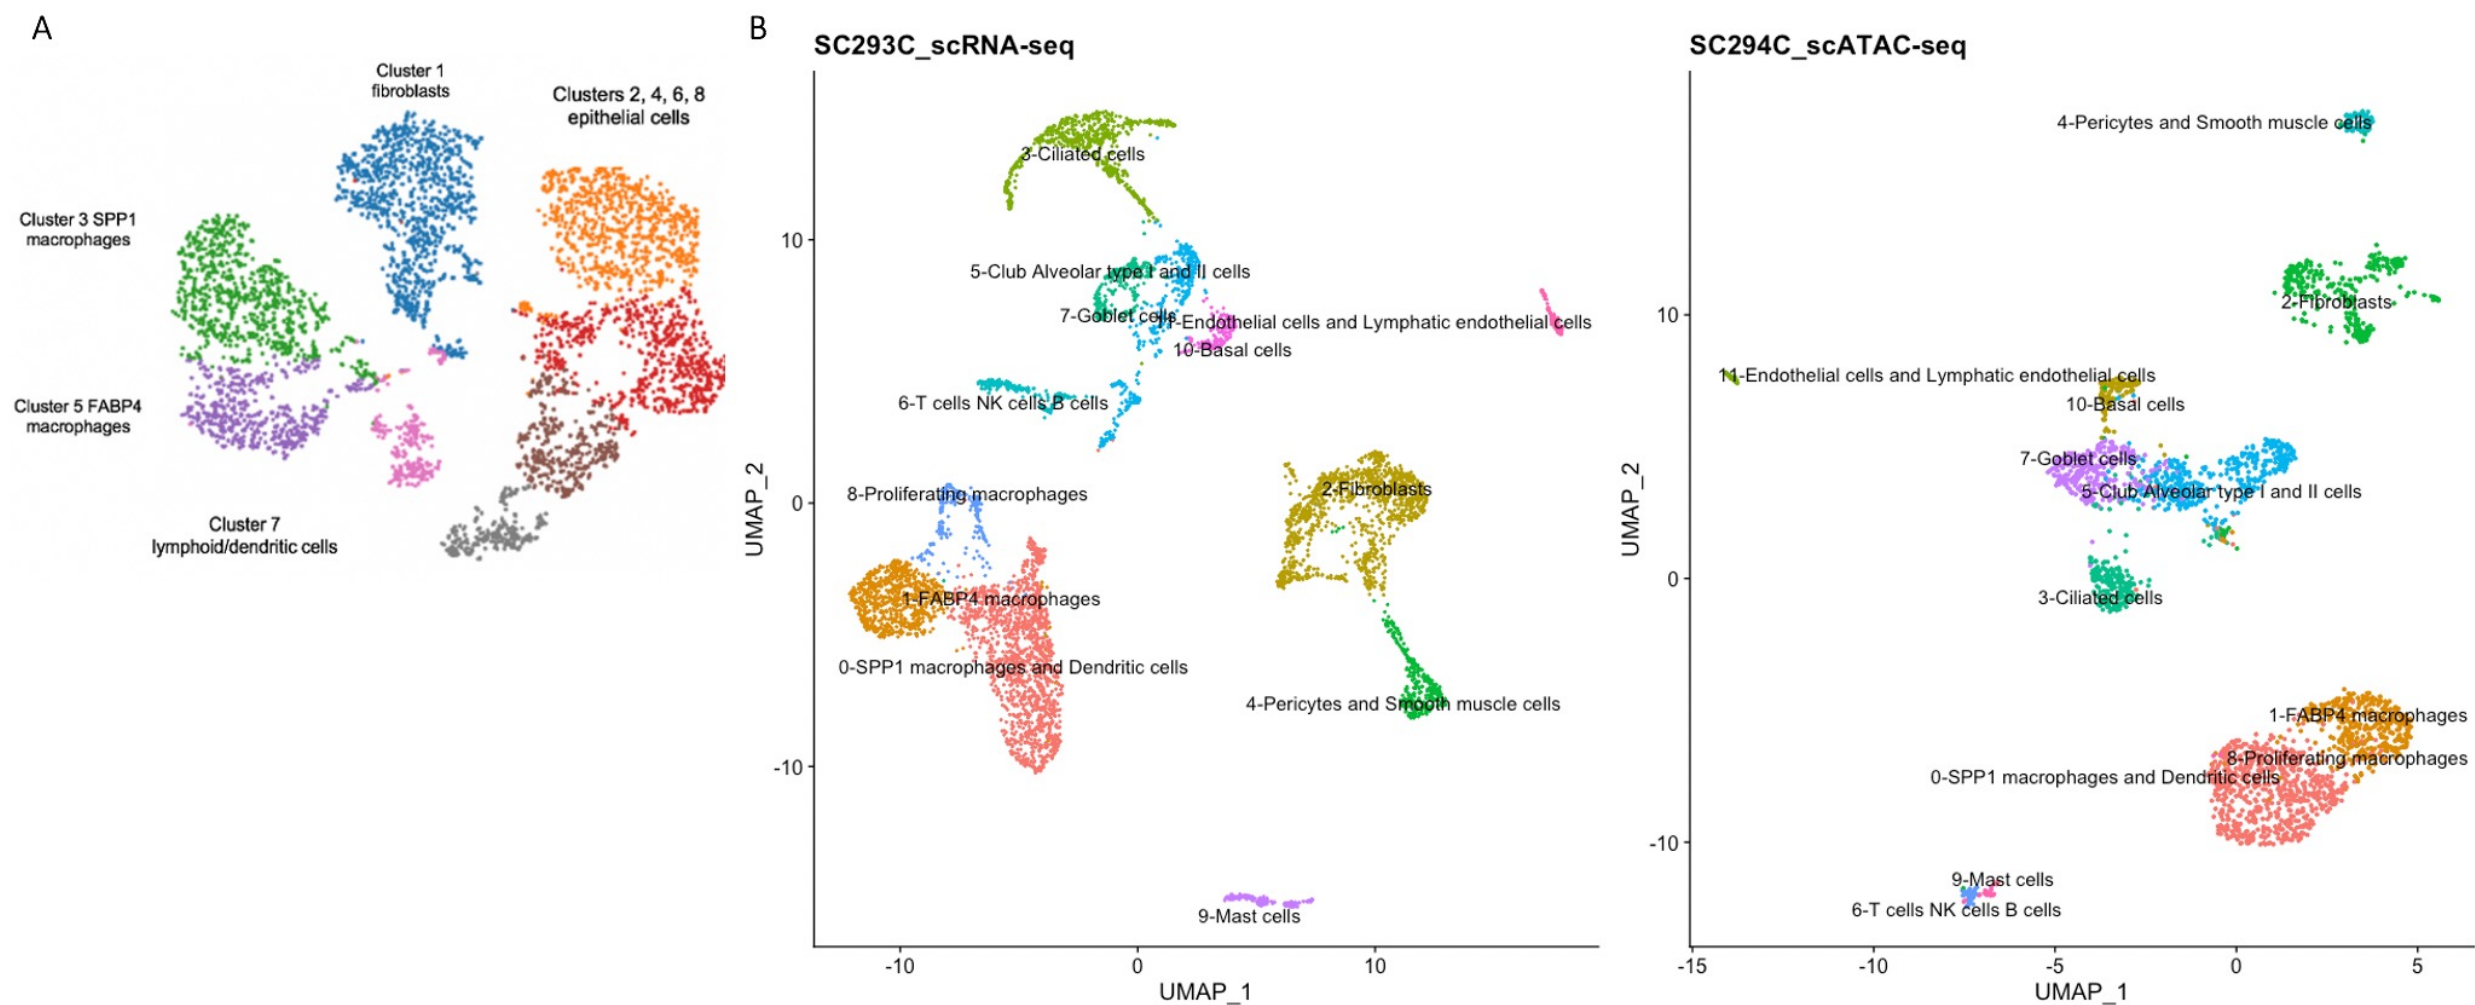

Supplementary Figure 26. Cell clusters identification during scATAC-sequencing of a SSc-ILD lung sample. (A) Cell clusters identification of SC294 SSc-ILD lung sample sequenced using scATAC-sequencing (Loupe, 10X Genomics). Loupe clusters cells based on pattern of accessible chromatin. (B) Cell clusters identification of SC294 SSc-ILD lung sample sequenced using scATAC-sequencing (Signac, Seurat package, Satija Lab). Signac recognizes all cell types including SPP1- M $\phi$  and FABP4-M $\phi$  subpopulations based on cell clustering following scRNA-sequencing of the same SSc-ILD lung sample in scRNA-sequencing 3' v3 Chemistry.

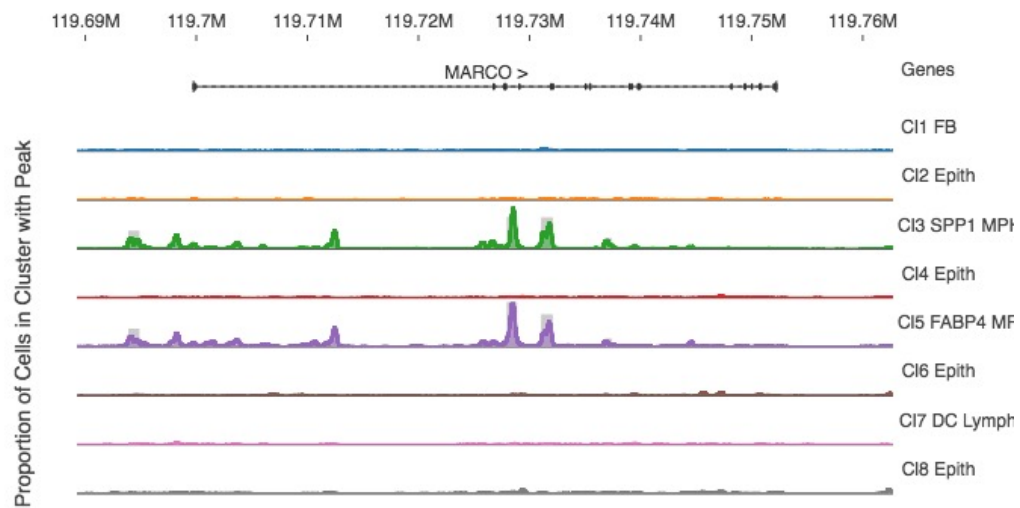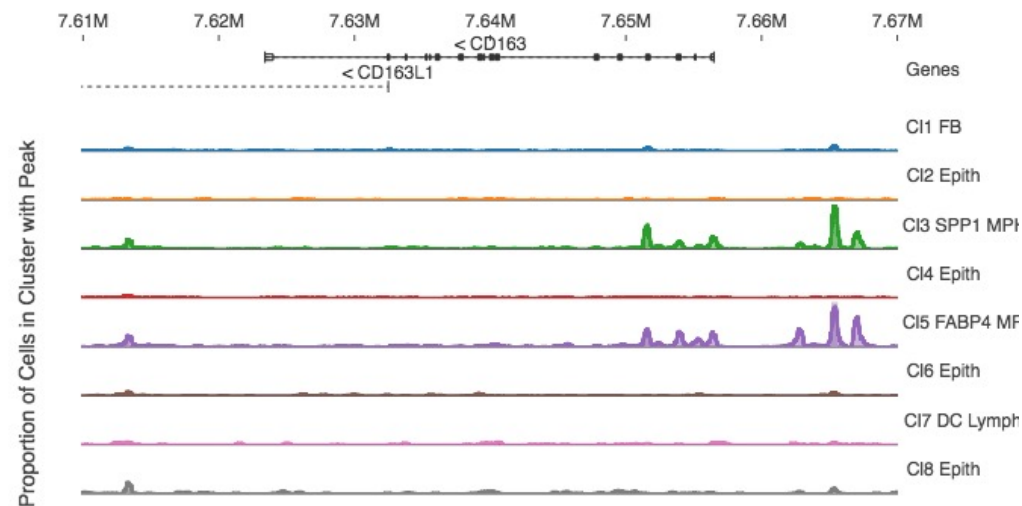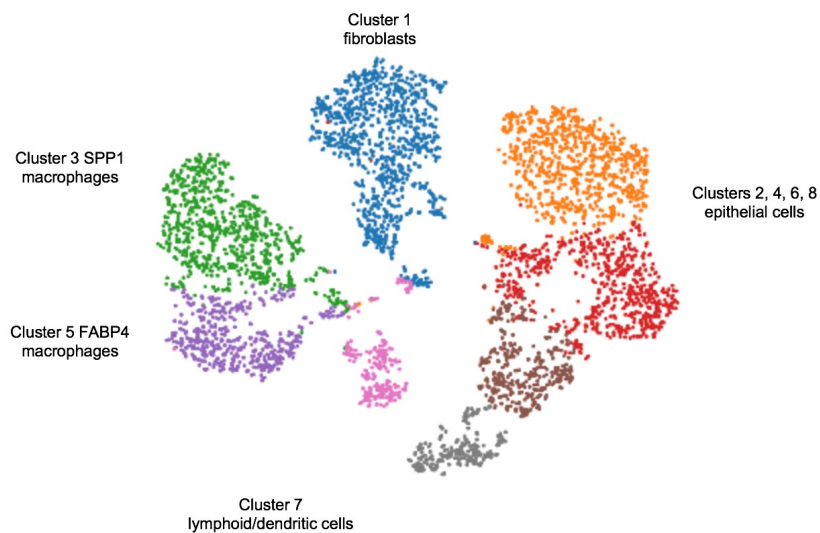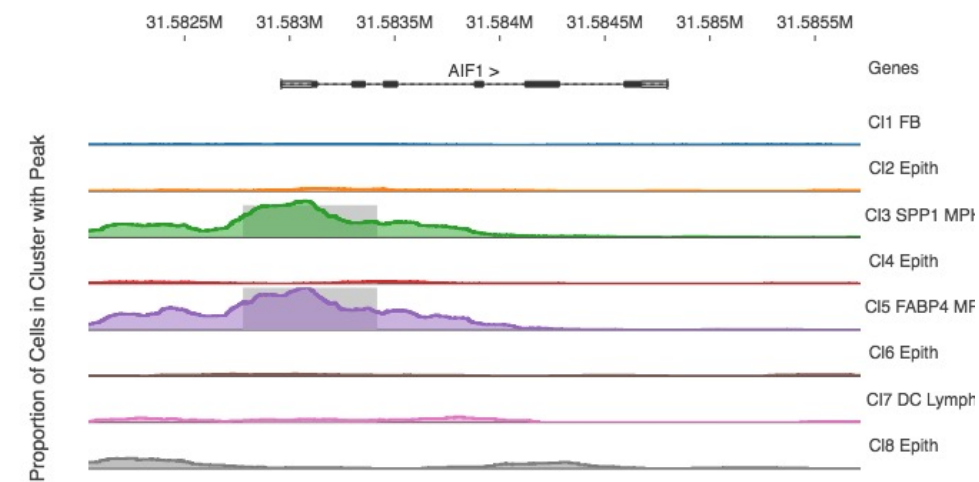

Supplementary Figure 27. Cell clusters identification during scATAC-seq of SSc-ILD lung sample SC294 (Loupe software, 10X Genomics). *MARCO*, *AIF1*, *CD163*- macrophage markers show open chromatin selectively in clusters 3, 5 indicating that these are macrophage clusters.

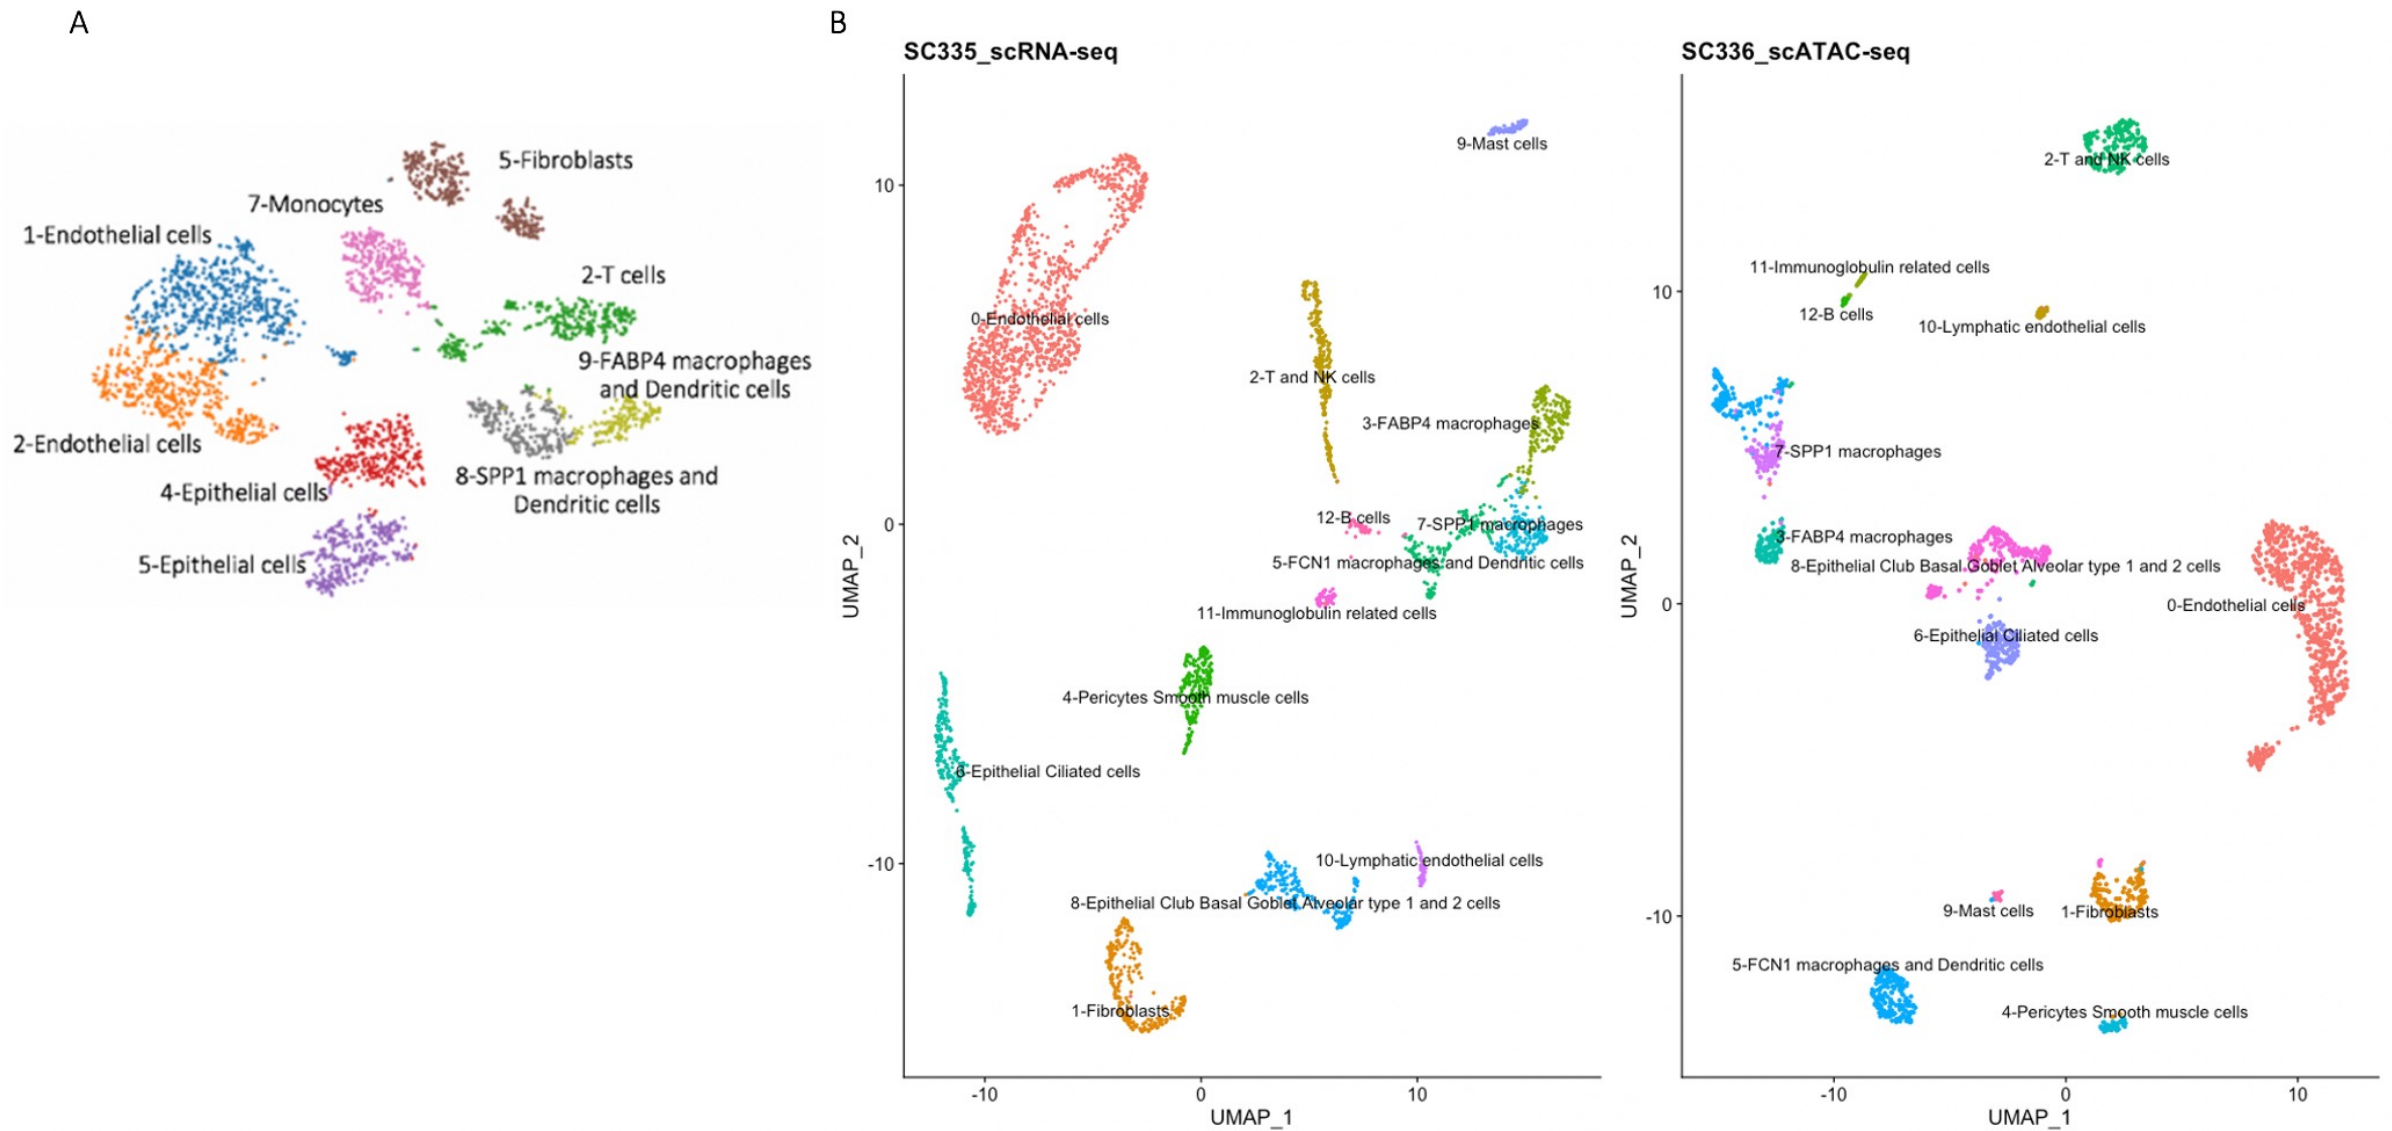

Supplementary Figure 28. (A) Cluster identification for SC336 SSc-ILD lung sample following scATAC-sequencing (Loupe software, 10X Genomics). Loupe software clusters cells based on patterns of accessible chromatin. (B) Cluster identification for SC336 SSc-ILD lung sample following scATAC-sequencing (Signac software, Seurat package, Satija Lab). Signac software (Satija Lab) recognizes SPP1- M $\phi$  and FABP4-M $\phi$  subpopulations based on cell clustering following scRNA-sequencing of the same SSc-ILD lung sample in scRNA-sequencing 5' Chemistry.

| Motif Name           | SPP1 macrophages<br>Log2 Fold Change | SPP1 macrophages P-<br>Value |
|----------------------|--------------------------------------|------------------------------|
| SSc-ILD sample SC294 |                                      |                              |
| JUNB                 | 0.20128049                           | 2.26E-73                     |
| FOSL2                | 0.20495588                           | 2.26E-73                     |
| JDP2                 | 0.19566932                           | 7.78E-73                     |
| JUND                 | 0.21575973                           | 2.03E-68                     |
| RELA                 | 0.18520054                           | 7.90E-60                     |
| JUN::JUNB            | 0.17614251                           | 1.27E-55                     |
| JUN(var.2)           | 0.15630376                           | 3.61E-55                     |
| FOSL2::JUN           | 0.18803655                           | 1.57E-54                     |
| Nr1h3::Rxra          | 0.02567833                           | 0.01146031                   |
| Creb3l2              | 0.03804506                           | 0.00139408                   |
| Mafb                 | 0.03082591                           | 0.04946388                   |
| Arid3a               | 0.00755867                           | 0.41551652                   |
| SSc-ILD sample SC336 |                                      |                              |
| FOSL2                | 0.18855657                           | 7.16E-17                     |
| JUNB                 | 0.18504058                           | 2.80E-16                     |
| BHLHE40              | 0.04021566                           | 0.16647644                   |
| TFEB                 | 0.03742098                           | 0.17654154                   |
| CREB3L2              | 0.03199525                           | 0.2519222                    |
| SREBF1               | 0.01300544                           | 0.80017521                   |
| ARID3A               | 0.006227                             | 0.85249829                   |
| MAFB                 | 0.00728728                           | 0.91262936                   |

Supplementary Figure 29. Accessible locally distinguishing transcription factor binding sites per cluster when comparing SPP1 M $\phi$  to FABP4 M $\phi$  as predicted by Loupe software, 10X Genomics for SSc-ILD samples SC294 and SC336. Transcription factors NR1H3, CREB3L2, MAFB, ARID3A, JUN and BHLHE40, TFEB, CREB3L2, SREBF1, ARID3A, MAFB for respective SSc-ILD samples SC294 and SC336 are also predicted to be important for SPP1 M $\phi$  by SCENIC software.

Supplementary Figure 30. ScATAC-seq analysis of 2 SSc-ILD lung samples (A, B) and 2 HC lungs (C, D) by Signac showing chromatin pattern changes for gene *SPP1* for all cell types. The red arrow indicates the direction of transcription. Exons are shown in blocks and introns flank exons. (A, B) *SPP1* gene showed more accessible chromatin for the SSc-ILD SPP1 Mφ compared to FABP4 Mφ in the region proximal to the transcriptional start site for a SSc-ILD lung, as well as regions further 5' of the promoter and in intron 4. (C, D) *SPP1* gene showed less accessible chromatin for the HC SPP1 Mφ compared to SSc-ILD SPP1 Mφ.

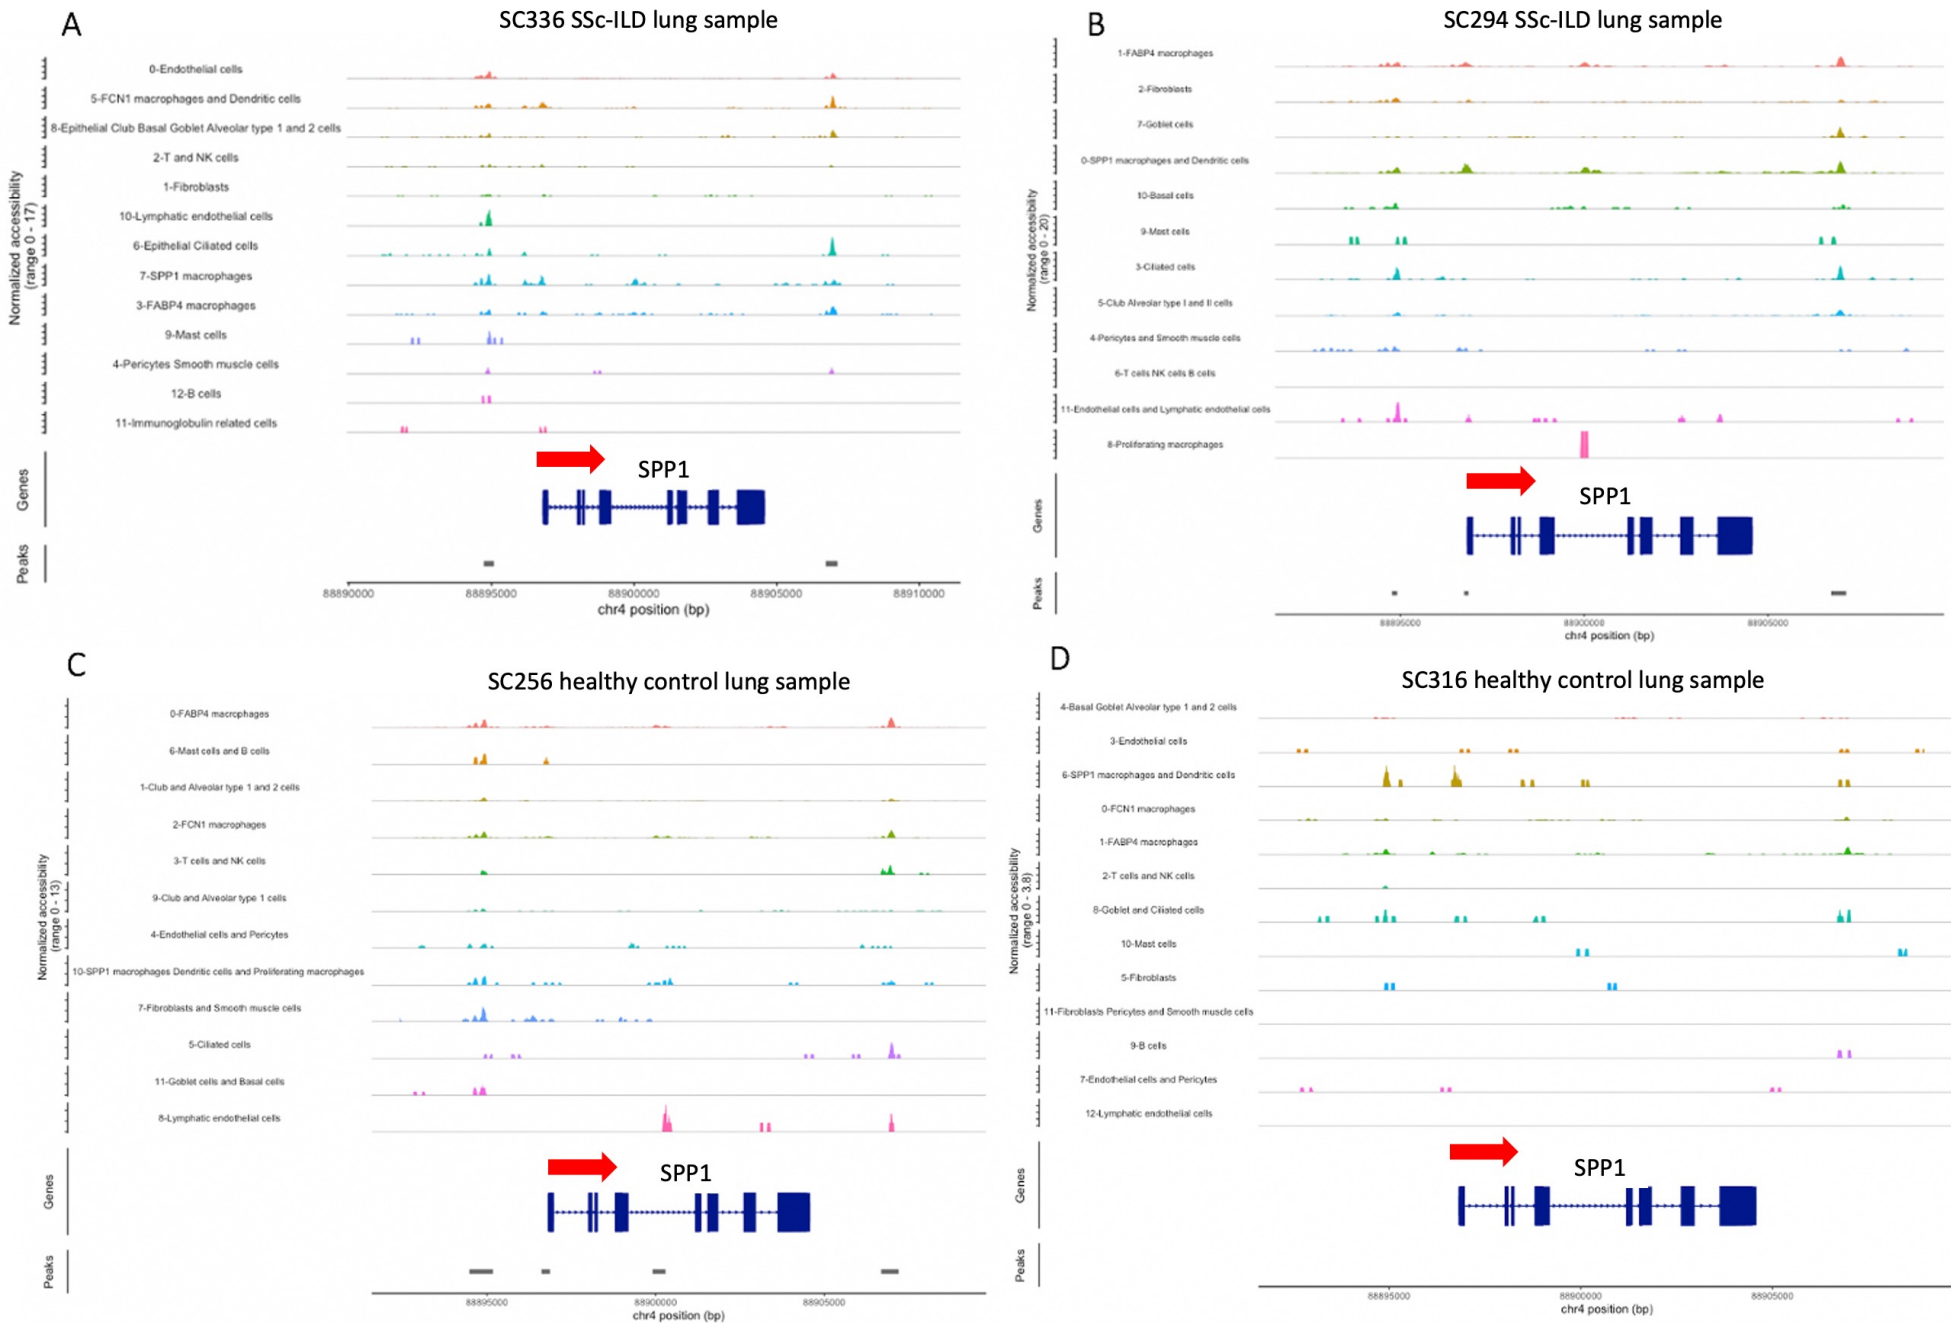

Supplementary Figure 31. ScATAC-seq analysis of 2 SSc-ILD lung samples (A, B) and 2 HC lungs (C, D) by Signac showing chromatin pattern changes for gene *MMP9* for all cell types. The red arrow indicates the direction of transcription. Exons are shown in blocks and introns flank exons. (A, B) *MMP9* gene showed more accessible chromatin in SPP1 M $\phi$ , but in this case increased accessibility was not seen around the promoter but rather in regions around exon 6, exons 9-12 and introns. (C, D) *MMP9* gene showed less accessible chromatin for the HC SPP1 M $\phi$  compared to SSc-ILD SPP1 M $\phi$ .

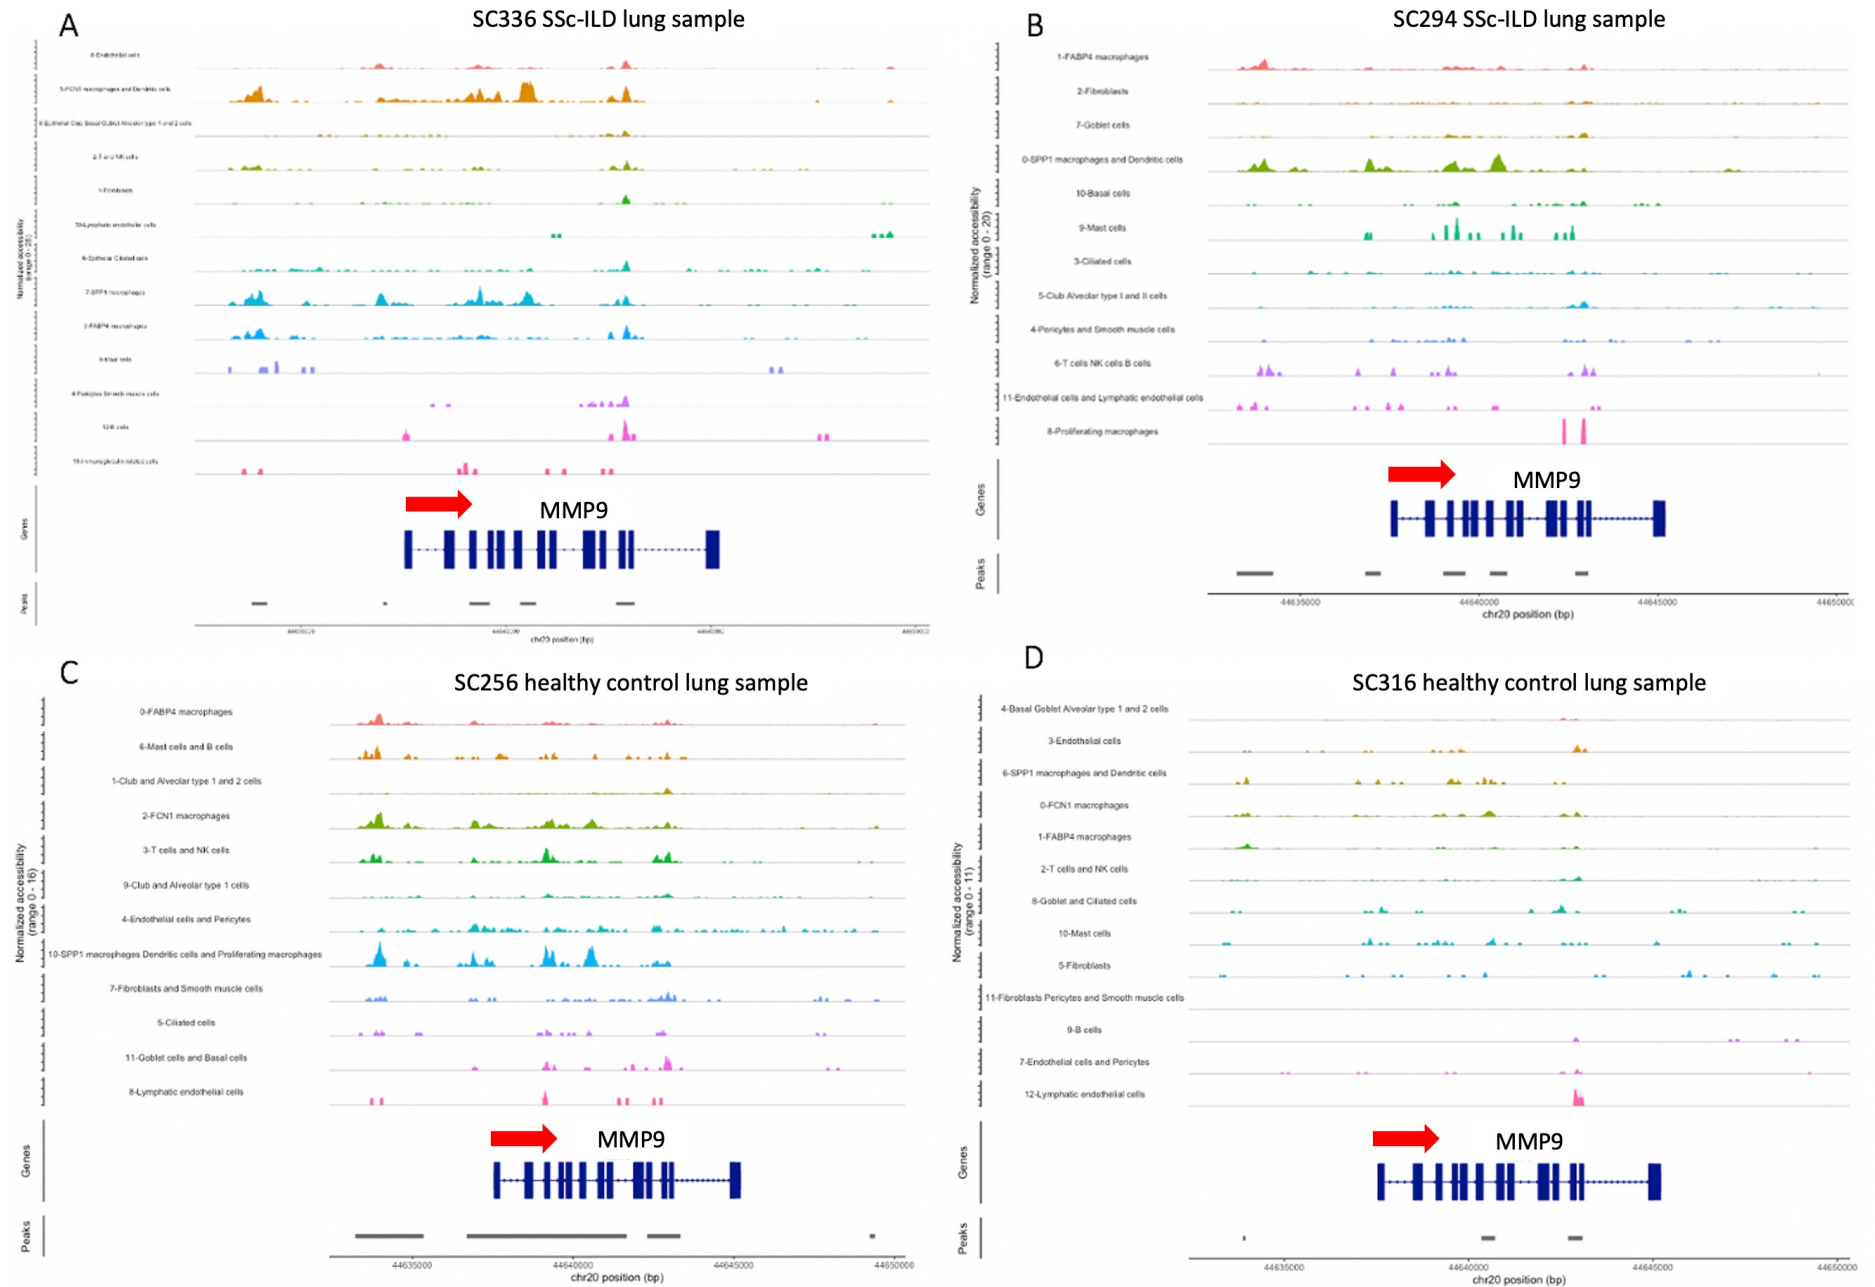

Supplementary Figure 32. ScATAC-seq analysis of 2 SSc-ILD lung samples (A, B) and 2 HC lungs (C, D) by Signac showing chromatin pattern changes for gene *FABP4* for all cell types. The red arrow indicates the direction of transcription. Exons are shown in blocks and introns flank exons. (A, B, C, D) *FABP4* gene showed more accessible chromatin in a region proximal to the transcriptional start site and in a broad second region 3' from the gene in *FABP4* M $\phi$  compared to SPP1 M $\phi$ .

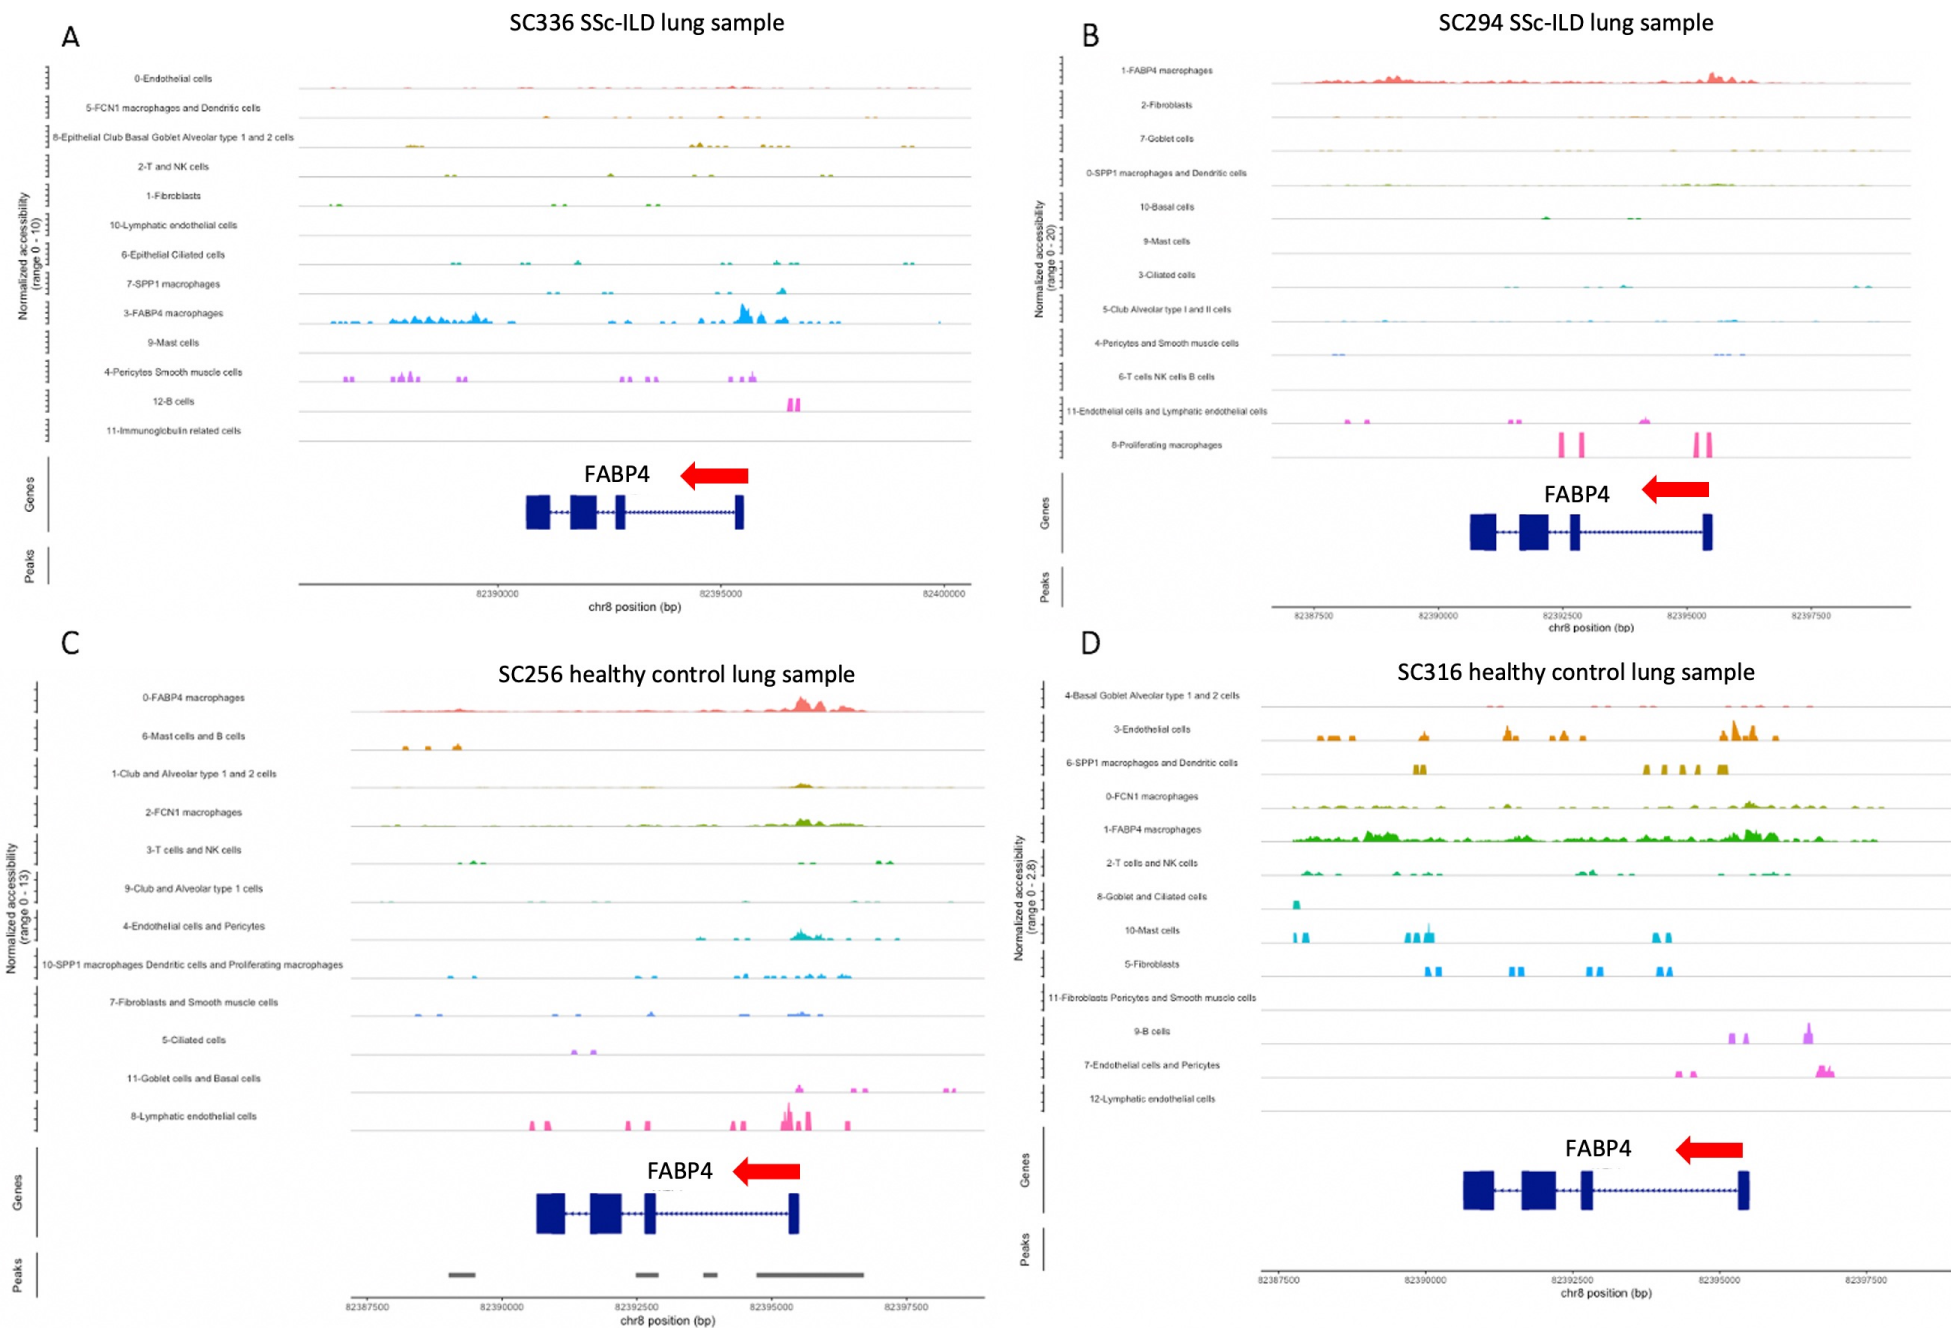



Supplementary Figure 33. Cluster identification for SC256 healthy control lung sample following scATAC-sequencing (Signac software, Seurat package, Satija Lab). Signac software (Satija Lab) recognizes SPP1 M $\phi$  and FABP4 M $\phi$  subpopulations based on cell clustering following scRNA-sequencing of the SC277 healthy control lung sample in scRNA-sequencing 3' v3 Chemistry from a different healthy control individual. There was noted problematic macrophage subpopulations clustering for the scATAC-seq sample, as the macrophage subpopulations were not clustered distinctly from one another.

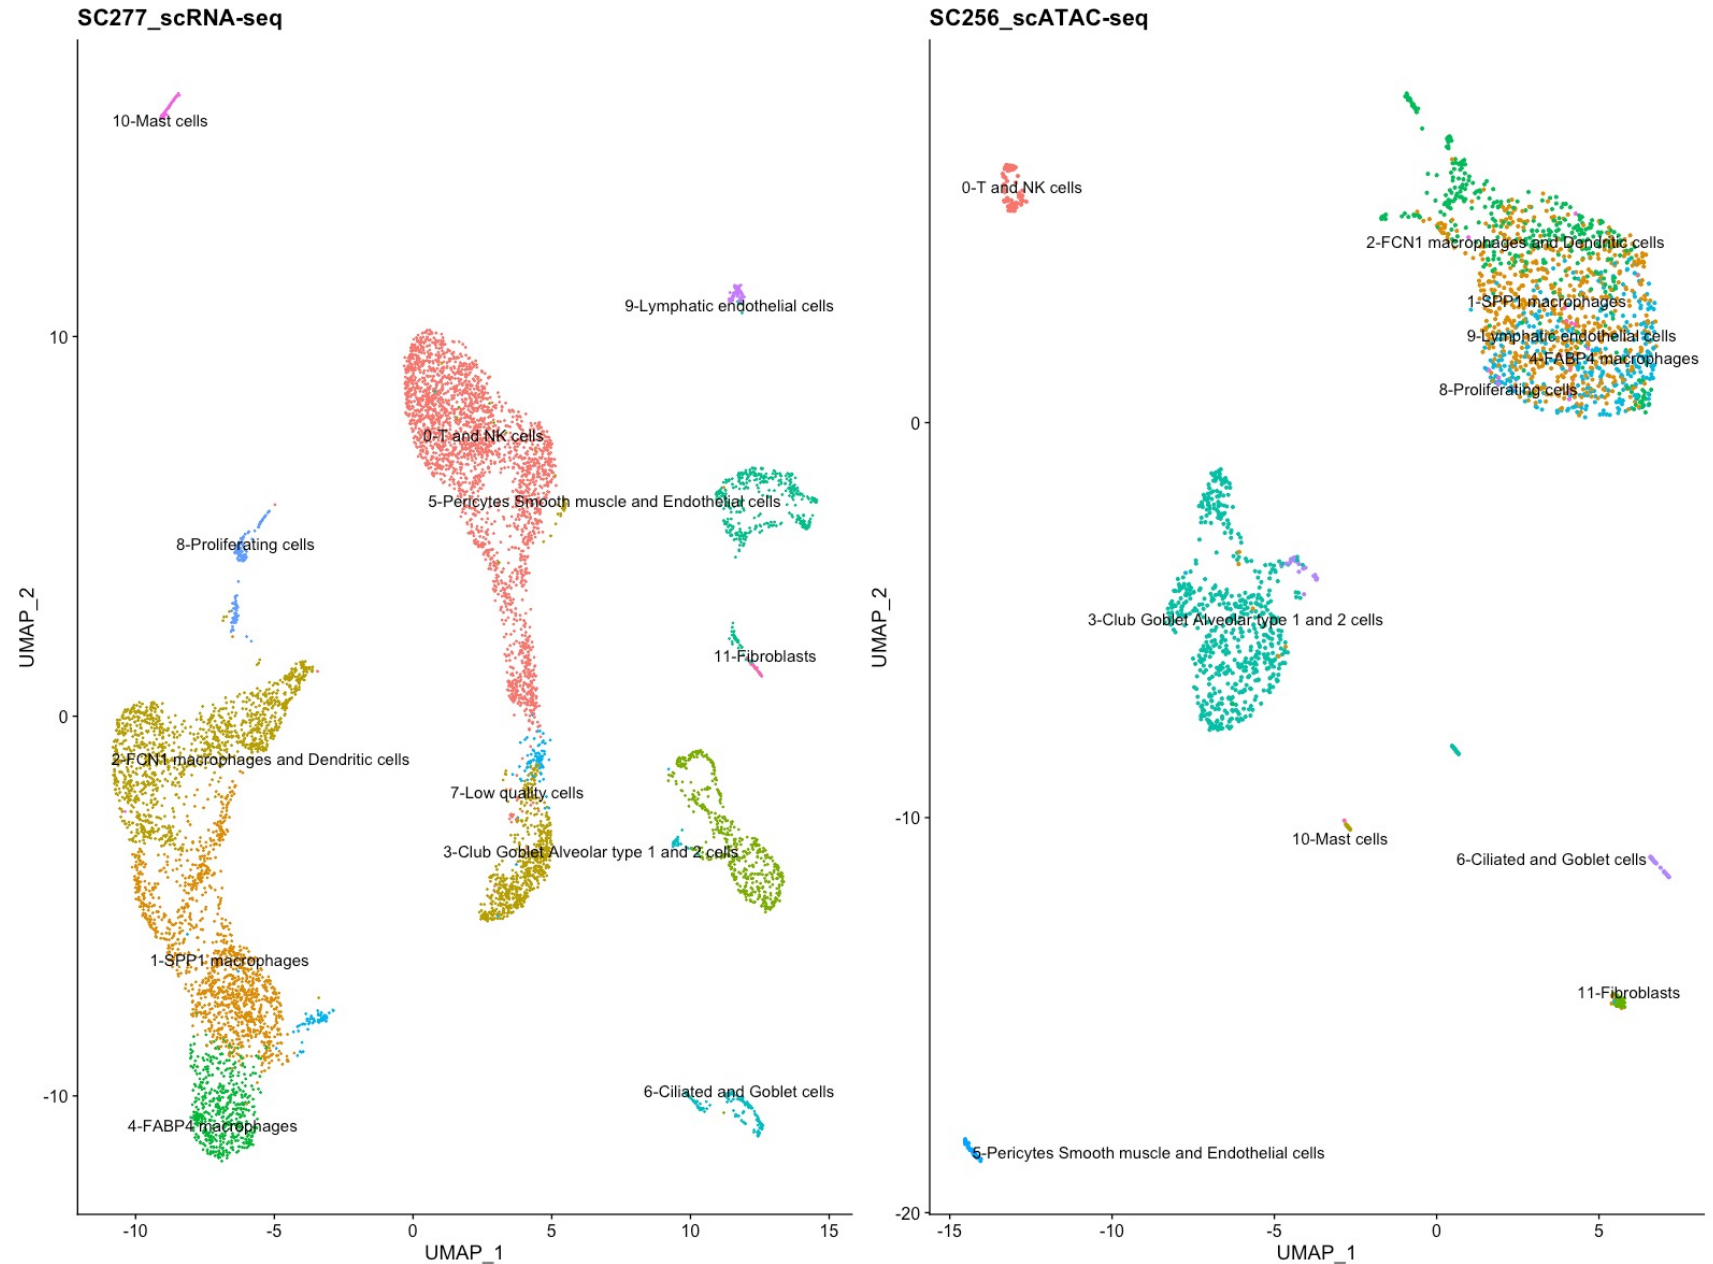

Supplementary Figure 34. Cluster identification for SC314 healthy control lung sample following scATAC-seq (Signac software, Seurat package, Satija Lab). Signac software (Satija Lab) recognizes SPP1 M $\phi$  and FABP4 M $\phi$  subpopulations based on cell clustering following scRNA-seq of the SC313 healthy control lung sample in scRNA-seq 5' v1 chemistry from the same healthy control individual. There was noted problematic macrophage subpopulations clustering for the scATAC-seq sample, as the macrophage subpopulations were not clustered distinctly from one another.

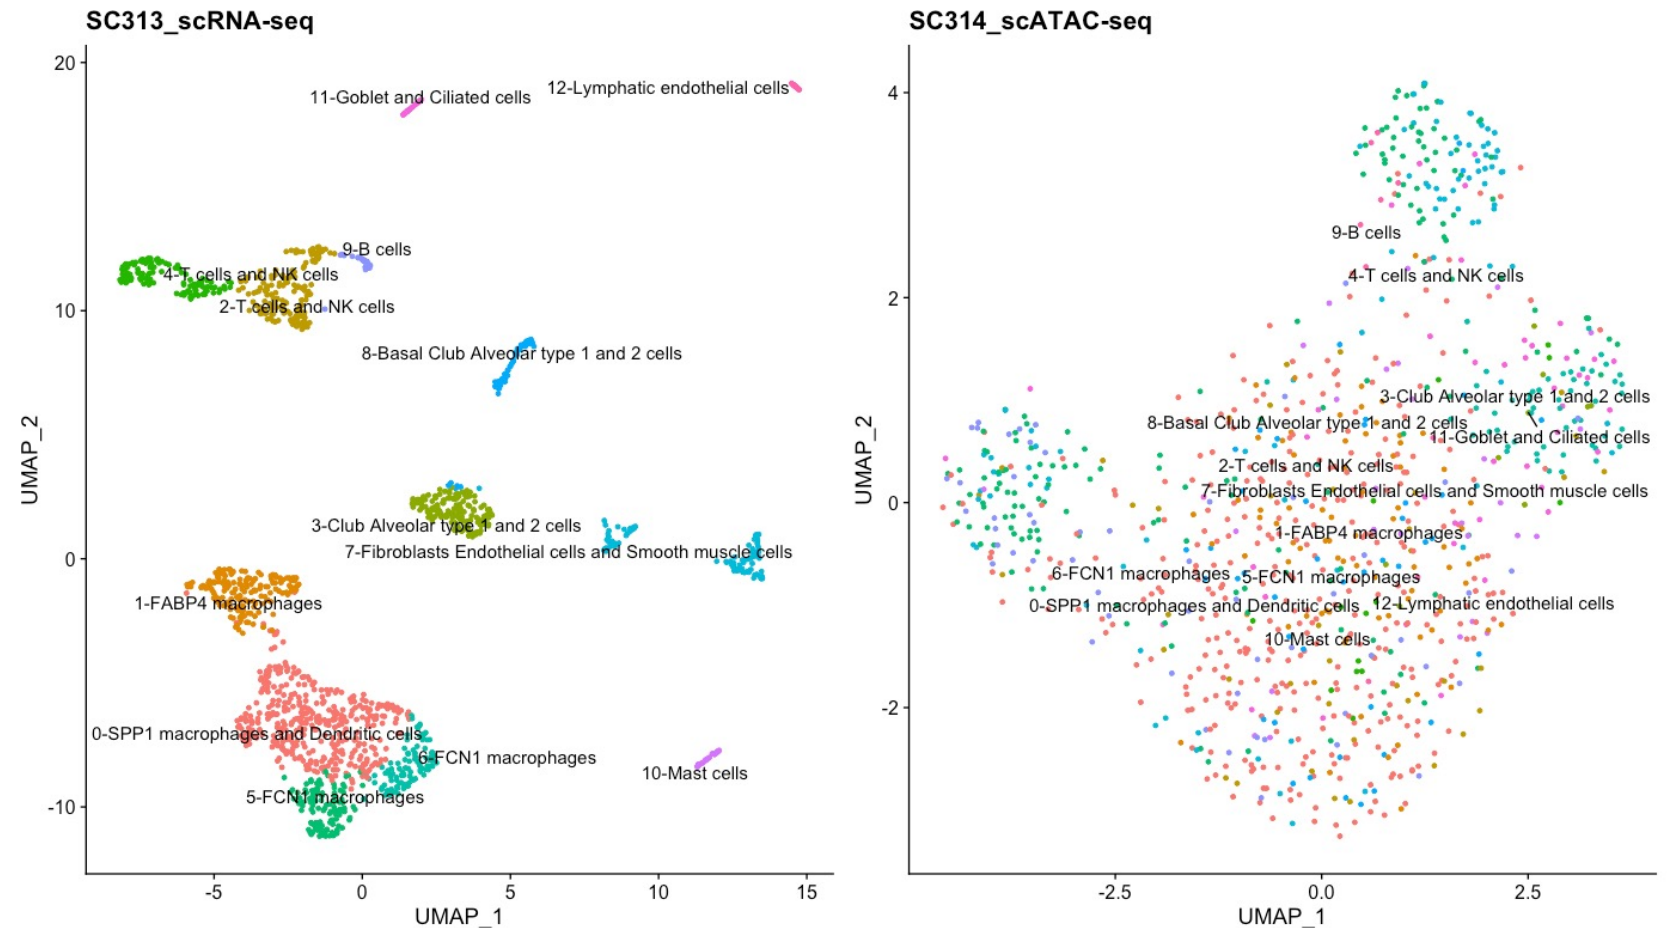

Supplementary Figure 35. Cluster identification for SC324 healthy control lung sample following scATAC-sequencing (Signac software, Seurat package, Satija Lab). Signac software (Satija Lab) recognizes SPP1 M $\phi$  and FABP4 M $\phi$  subpopulations based on cell clustering following scRNA-sequencing of the healthy control lung sample in scRNA-sequencing 5' v1 chemistry from the same healthy control individual. There was noted problematic macrophage subpopulations clustering for the scATAC-seq sample, as the macrophage subpopulations were not clustered distinctly from one another.

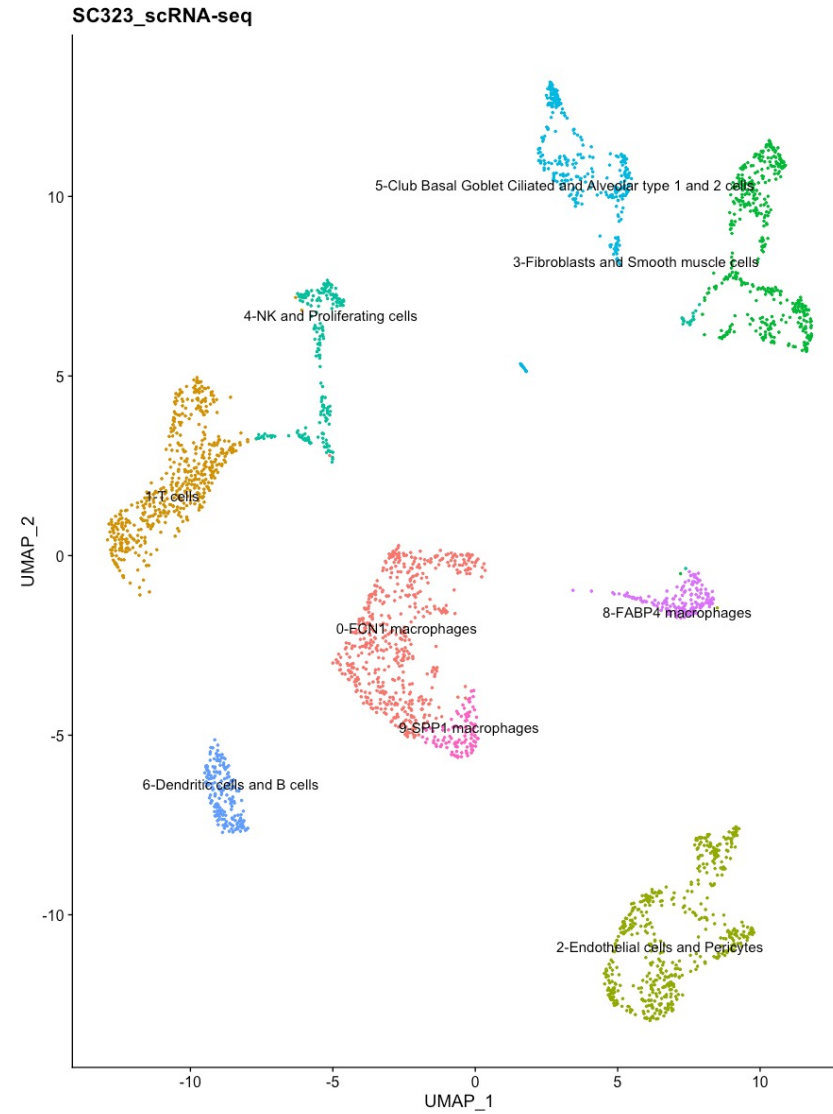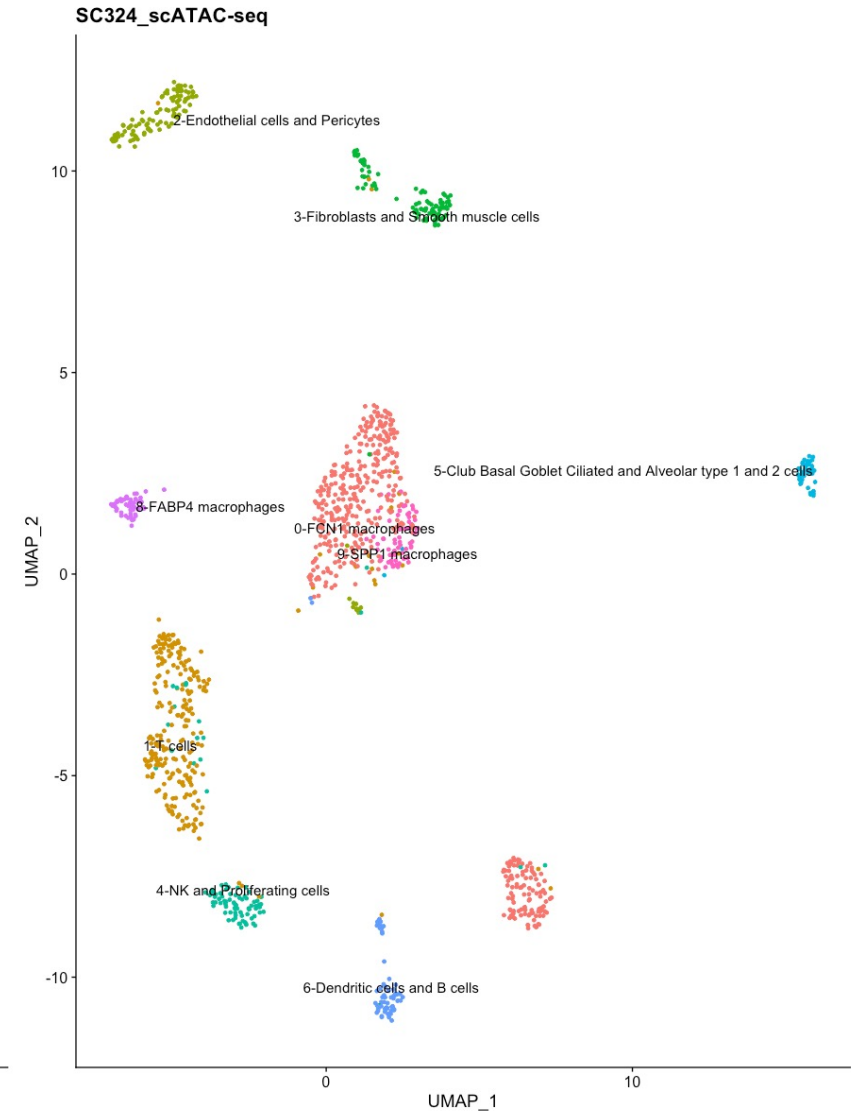

Supplementary Figure 36. Cluster identification for SC316 healthy control lung sample following scATAC-sequencing (Signac software, Seurat package, Satija Lab). Signac software (Satija Lab) recognizes SPP1 M $\phi$  and FABP4 M $\phi$  subpopulations based on cell clustering following scRNA-sequencing of the SC315 healthy control lung sample in scRNA-sequencing 5' v1 chemistry from the same healthy control individual. There was noted problematic macrophage subpopulations clustering for the scATAC-seq sample, as the macrophage subpopulations were not clustered distinctly from one another.

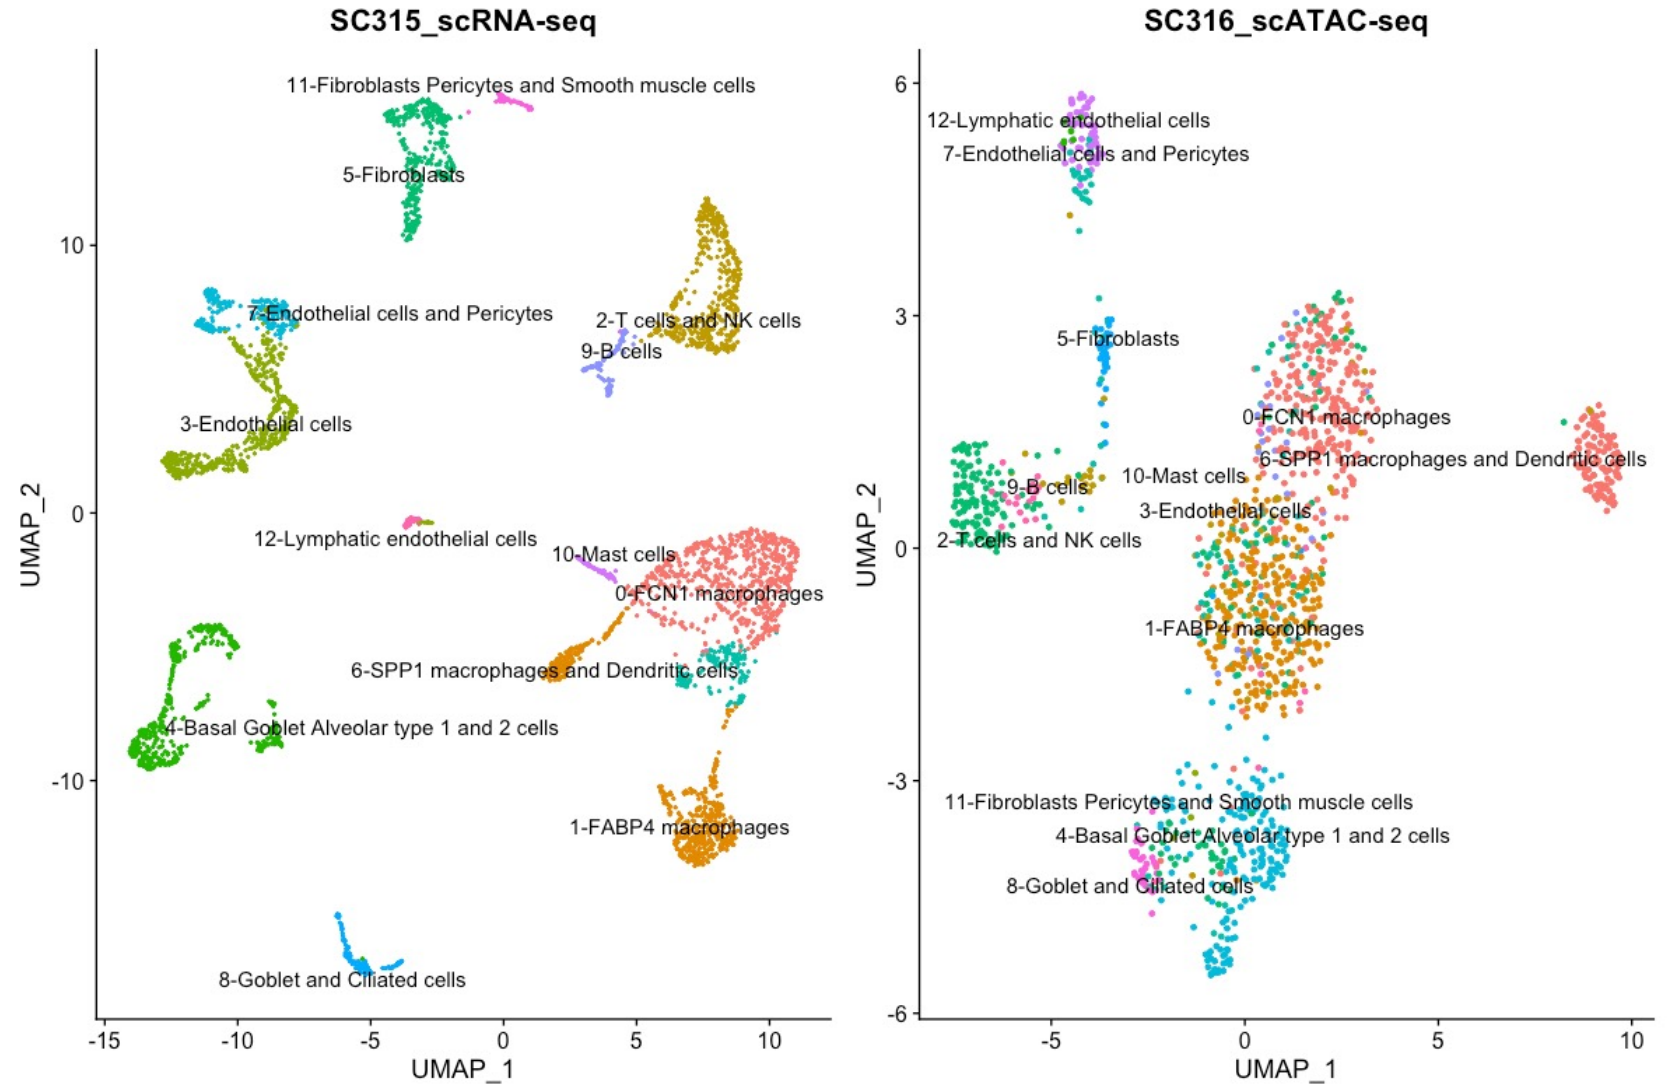

Supplementary Figure 37. Cluster identification for SC256 healthy control lung sample following scATAC-seq (Signac software, Seurat package, Satija Lab). Signac software (Satija Lab) recognizes SPP1 M $\phi$  and FABP4 M $\phi$  subpopulations based on cell clustering following scRNA-seq of the SC333 healthy control lung sample in scRNA-seq 5' v1 chemistry from the same healthy control individual. There are identified macrophage subpopulations including SPP1 M $\phi$ , FABP4 M $\phi$  and FCN1 M $\phi$  for the scATAC-seq sample. There appear to be few SPP1 M $\phi$  present in healthy control lung samples.

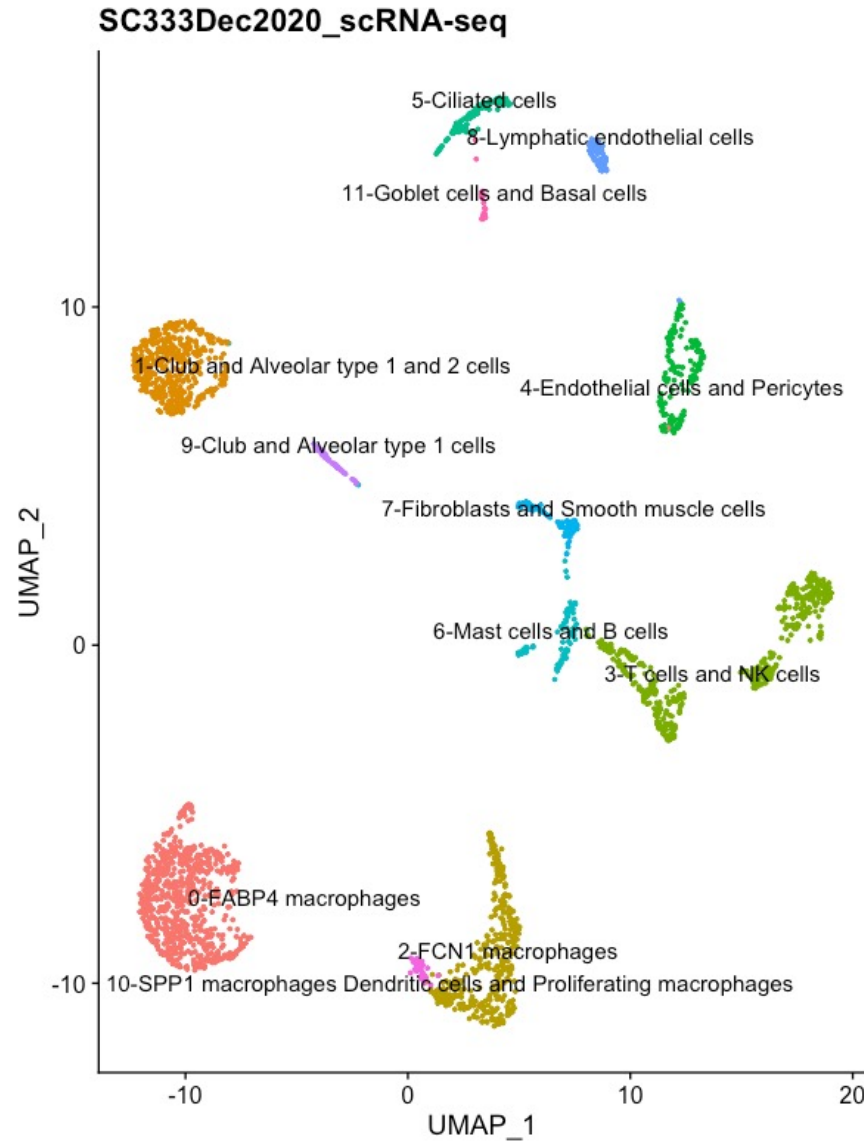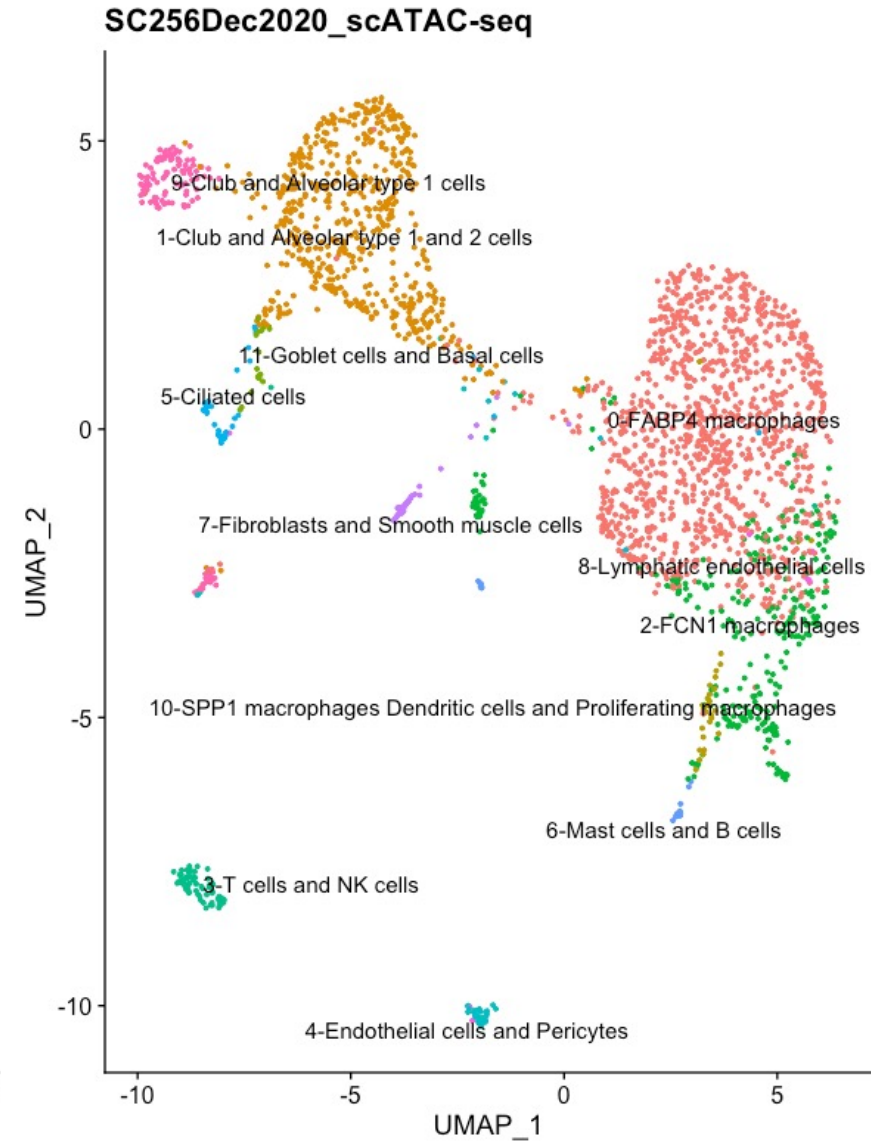

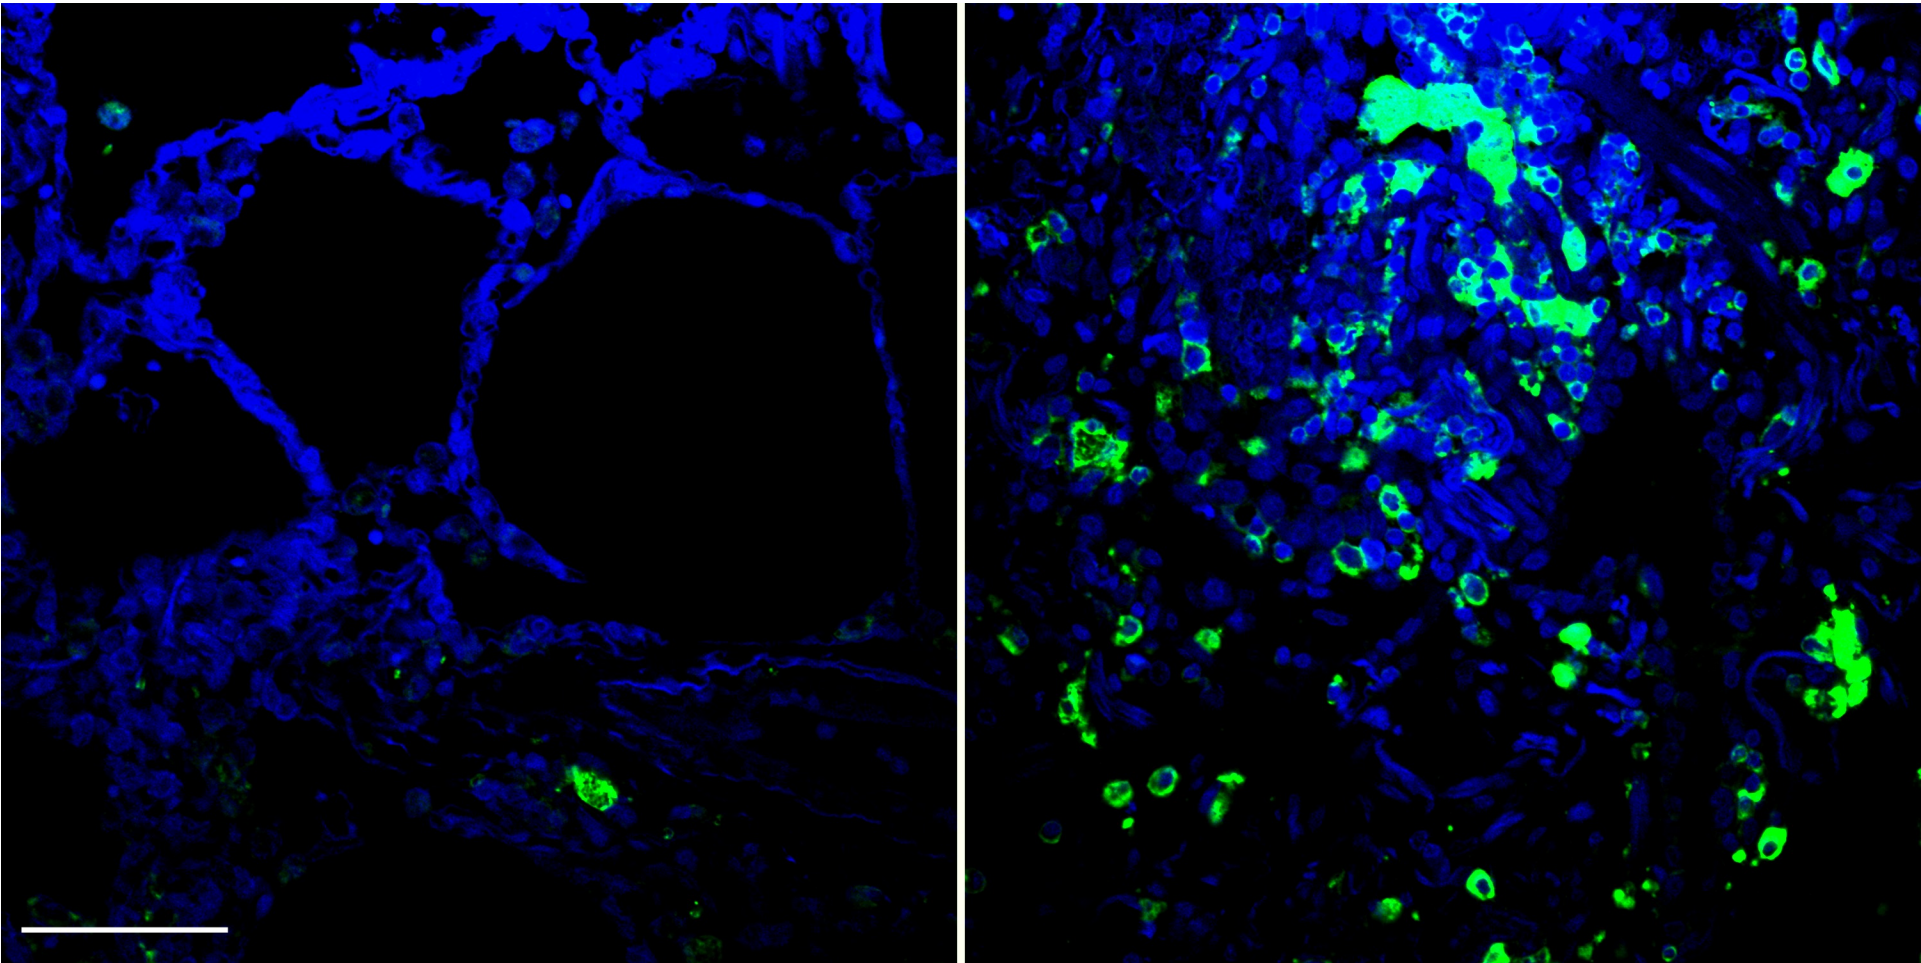

Control vs SSC-ILD MERTK (green) DAPI (blue) 40X scale bar = 100uM

Supplementary Figure 38. Immunofluorescence for MERTK antibody using HC vs SSc-ILD lung samples. MERTK antibody is in green and DAPI stain is in blue indicating the nucleus of the macrophages.

Supplementary Figure 39.  
Immunofluorescence for  
MERTK and TFEB antibodies  
using SSc-ILD lung sample.  
MERTK antibody is in green,  
TFEB antibody is in red and  
DAPI stain is in blue. The area  
on the lower left part of the  
figure is zooming in on a single  
cell level.

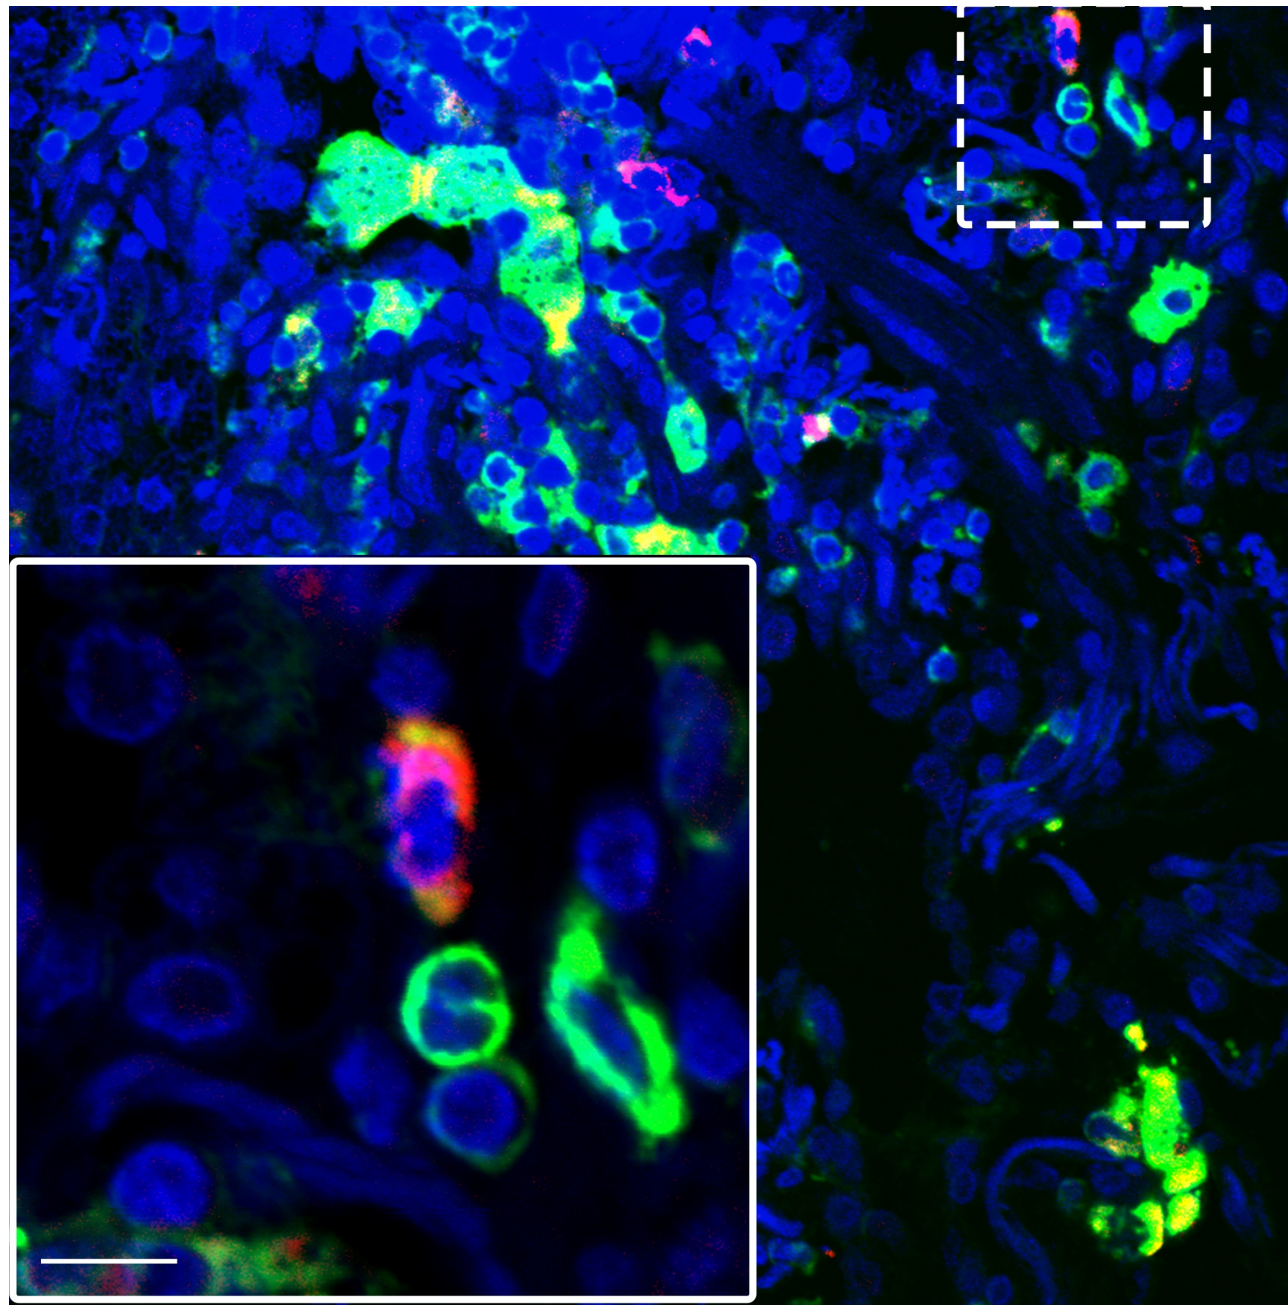

SSc-ILD MERTK (green) TFEB (red) DAPI (blue) original 40X inset scale bar = 25uM @120X

Supplementary Figure 40. Immunofluorescence for MERTK and TFEB antibodies using SSc-ILD lung sample. Zooming in on a single cell level DAPI stain is in blue, MERTK antibody is in green and TFEB antibody is in red. The area in the middle and the right part of the figure show the breakout for each stain on a single cell level.

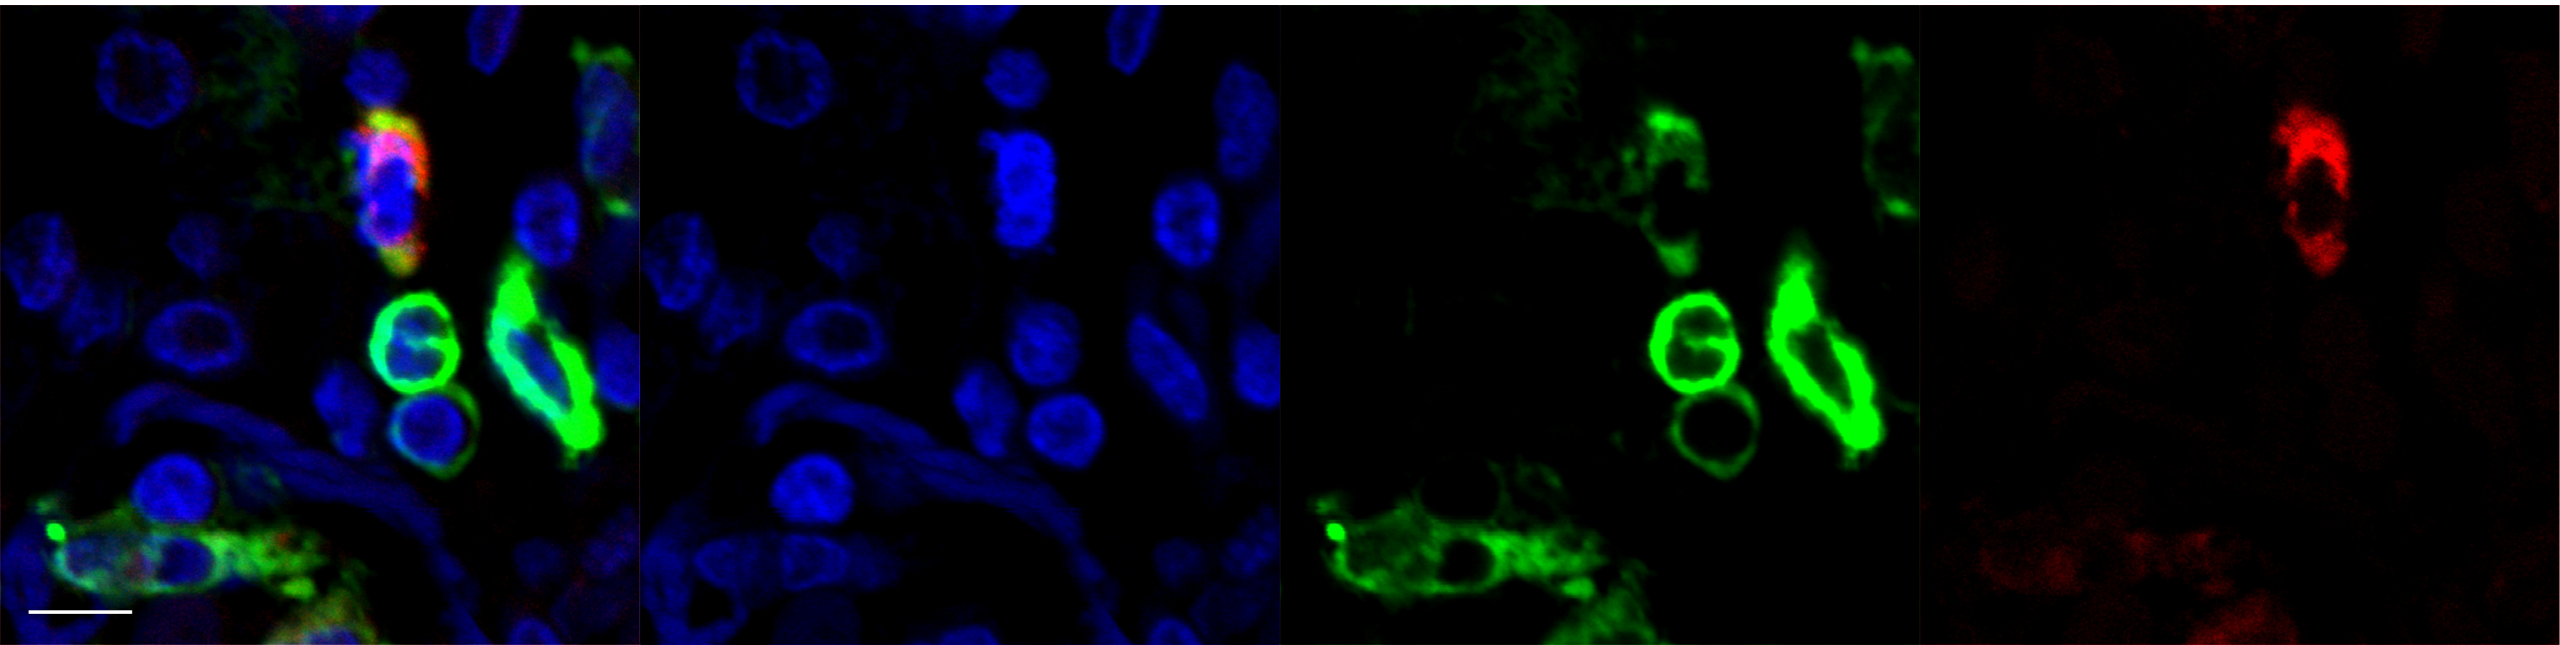

Supplement: NIHMS1819536-supplement-supinfo2.pdf [file NIHMS1819536-supplement-supinfo2.pdf]
