# Supplementary material
Source: PubMed Central journal article supplement (PMC9771864)
Supplement: NIHMS1819536-supplement-Table_S1__1_.pdf [file NIHMS1819536-supplement-Table_S1__1_.pdf]

**Table S1. Characteristics of Patient Samples**

| Lung ID | Gender  | Age     | Disease Status | Type of Analysis | Chemistry | Pair scRNA and scATAC | Selection                                                        | Number of cells | Number of reads per sample |
|---------|---------|---------|----------------|------------------|-----------|-----------------------|------------------------------------------------------------------|-----------------|----------------------------|
| SC277   | Male    | 21      | Normal         | scRNA-seq        | 3' v3     | no                    |                                                                  | 8,746           | 475,907,037                |
| SC281   | Female  | 43      | SSc-ILD        | scRNA-seq        | 3' v3     | no                    |                                                                  | 8,193           | 507,681,287                |
| SC284   | Male    | 33      | SSc-ILD        | scRNA-seq        | 3' v3     | no                    |                                                                  | 9,114           | 464,018,961                |
| SC286   | Female  | 62      | SSc-ILD        | scRNA-seq        | 3' v3     | no                    |                                                                  | 7,780           | 616,060,662                |
| SC293   | unknown | unknown | SSc-ILD        | scRNA-seq        | 3' v3     | yes                   | 1/2 CD45, CD31 and EPCAM depleted, 1/2 PDGFRA positive selection | 7,657           | 493,619,631                |
| SC313   | Male    | 33      | Normal         | scRNA-seq        | 5' v1     | yes                   |                                                                  | 1,619           | 130,572,721                |
| SC315   | Female  | 64      | Normal         | scRNA-seq        | 5' v1     | yes                   |                                                                  | 3,742           | 247,085,410                |
| SC323   | Male    | 38      | Normal         | scRNA-seq        | 5' v1     | yes                   | 1/2 CD45 and EPCAM depleted                                      | 3,447           | 253,893,668                |
| SC333   | Male    | 62      | Normal         | scRNA-seq        | 5' v1     | no                    | 1/2 CD45 and EPCAM depleted                                      | 3,072           | 464,793,088                |
| SC334   | Male    | 63      | Normal         | scRNA-seq        | 5' v1     | no                    | No depletions                                                    | 3,374           | 510,320,213                |
| SC335   | Female  | 42      | SSc-ILD        | scRNA-seq        | 5' v1     | yes                   | 1/2 CD45 and EPCAM depleted                                      | 3,833           | 162,631,332                |

SSc-ILD: systemic sclerosis- associate dinterstitial lung disease

scRNA-seq: single cell RNA-sequencing
