# Supplementary material
Source: PubMed Central journal article supplement (PMC9771864)
Supplement: NIHMS1819536-supplement-Table_S2.pdf [file NIHMS1819536-supplement-Table_S2.pdf]

|         | p_val | avg_logFC  | pct.1 | pct.2 | p_val_adj |
|---------|-------|------------|-------|-------|-----------|
| SPP1    | 0     | 3.09827681 | 0.651 | 0.318 | 0         |
| GPNMB   | 0     | 1.54686652 | 0.975 | 0.696 | 0         |
| APOE    | 0     | 1.38559281 | 0.917 | 0.735 | 0         |
| LGMN    | 0     | 1.33972154 | 0.763 | 0.416 | 0         |
| PLA2G7  | 0     | 1.14901438 | 0.794 | 0.25  | 0         |
| CSTB    | 0     | 1.05047122 | 0.998 | 0.988 | 0         |
| CTSD    | 0     | 0.89093724 | 0.999 | 0.98  | 0         |
| SDC2    | 0     | 0.8714892  | 0.677 | 0.276 | 0         |
| CTSL    | 0     | 0.85100381 | 0.974 | 0.878 | 0         |
| GM2A    | 0     | 0.78956791 | 0.782 | 0.505 | 0         |
| FNIP2   | 0     | 0.775799   | 0.784 | 0.372 | 0         |
| CTSB    | 0     | 0.7719616  | 0.997 | 0.994 | 0         |
| EMP1    | 0     | 0.74143675 | 0.647 | 0.282 | 0         |
| APOC1   | 0     | 0.73306972 | 0.948 | 0.759 | 0         |
| PLD3    | 0     | 0.73163347 | 0.82  | 0.638 | 0         |
| LILRB4  | 0     | 0.72942358 | 0.742 | 0.342 | 0         |
| CAPG    | 0     | 0.72417797 | 0.968 | 0.811 | 0         |
| DAB2    | 0     | 0.7098914  | 0.966 | 0.737 | 0         |
| LGALS3  | 0     | 0.70723288 | 0.997 | 0.973 | 0         |
| ACP5    | 0     | 0.68932015 | 0.97  | 0.77  | 0         |
| CTSZ    | 0     | 0.68401779 | 0.994 | 0.982 | 0         |
| TREM2   | 0     | 0.66998791 | 0.731 | 0.393 | 0         |
| CD84    | 0     | 0.65528969 | 0.725 | 0.383 | 0         |
| OTOA    | 0     | 0.6548229  | 0.612 | 0.139 | 0         |
| CYP27A1 | 0     | 0.64524453 | 0.862 | 0.586 | 0         |
| MATK    | 0     | 0.62061307 | 0.445 | 0.088 | 0         |
| RALA    | 0     | 0.61842933 | 0.751 | 0.42  | 0         |
| SOAT1   | 0     | 0.61403857 | 0.835 | 0.582 | 0         |
| LAMP1   | 0     | 0.61255446 | 0.979 | 0.878 | 0         |
| HS3ST2  | 0     | 0.60400013 | 0.294 | 0.017 | 0         |
| PDXK    | 0     | 0.58584087 | 0.933 | 0.779 | 0         |
| PLPP3   | 0     | 0.56130686 | 0.521 | 0.125 | 0         |
| TM4SF19 | 0     | 0.55848819 | 0.358 | 0.059 | 0         |
| CD63    | 0     | 0.55799021 | 1     | 0.999 | 0         |
| ABCA1   | 0     | 0.52450972 | 0.642 | 0.275 | 0         |
| CD68    | 0     | 0.51959293 | 0.998 | 0.981 | 0         |
| LHFPL2  | 0     | 0.50924652 | 0.678 | 0.316 | 0         |
| SGK1    | 0     | 0.48880979 | 0.885 | 0.669 | 0         |
| ATP6V1F | 0     | 0.48349186 | 0.995 | 0.967 | 0         |
| CALU    | 0     | 0.4792283  | 0.762 | 0.49  | 0         |
| FAM20C  | 0     | 0.47804639 | 0.576 | 0.231 | 0         |
| NRP2    | 0     | 0.47424253 | 0.607 | 0.193 | 0         |
| CREG1   | 0     | 0.47082475 | 0.918 | 0.789 | 0         |
| VAT1    | 0     | 0.46892032 | 0.799 | 0.463 | 0         |

|          |   |            |       |       |   |
|----------|---|------------|-------|-------|---|
| HEXB     | 0 | 0.46480984 | 0.949 | 0.813 | 0 |
| MCRIP2   | 0 | 0.46438745 | 0.64  | 0.297 | 0 |
| USF2     | 0 | 0.46231993 | 0.849 | 0.612 | 0 |
| TMEM38B  | 0 | 0.44993391 | 0.581 | 0.243 | 0 |
| BRI3     | 0 | 0.4449232  | 0.999 | 0.997 | 0 |
| CHST11   | 0 | 0.44450675 | 0.701 | 0.376 | 0 |
| ATP6V0D2 | 0 | 0.44241672 | 0.406 | 0.092 | 0 |
| HM13     | 0 | 0.43994916 | 0.841 | 0.613 | 0 |
| SLC29A3  | 0 | 0.43985572 | 0.48  | 0.125 | 0 |
| SDSL     | 0 | 0.43852946 | 0.596 | 0.255 | 0 |
| PSAP     | 0 | 0.43843172 | 1     | 0.997 | 0 |
| NPC1     | 0 | 0.43645774 | 0.579 | 0.241 | 0 |
| VIM      | 0 | 0.40849418 | 1     | 1     | 0 |
| NPC2     | 0 | 0.37421937 | 0.998 | 0.993 | 0 |
| ASAH1    | 0 | 0.36683818 | 0.994 | 0.976 | 0 |
| TIMP2    | 0 | 0.36181744 | 0.976 | 0.909 | 0 |
| SLC26A11 | 0 | 0.34065115 | 0.416 | 0.1   | 0 |
| GSDME    | 0 | 0.33501826 | 0.365 | 0.036 | 0 |
| TPT1     | 0 | -0.3264986 | 1     | 1     | 0 |
| ITM2B    | 0 | -0.3902017 | 0.979 | 0.997 | 0 |
| MYL12A   | 0 | -0.3935029 | 0.981 | 0.996 | 0 |
| MTPN     | 0 | -0.3966249 | 0.847 | 0.945 | 0 |
| LCP1     | 0 | -0.4456956 | 0.932 | 0.985 | 0 |
| CASP1    | 0 | -0.4547447 | 0.396 | 0.685 | 0 |
| CST3     | 0 | -0.4636994 | 0.994 | 1     | 0 |
| JPT1     | 0 | -0.468147  | 0.609 | 0.836 | 0 |
| PYCARD   | 0 | -0.4792395 | 0.762 | 0.919 | 0 |
| ARHGDI8  | 0 | -0.5031475 | 0.797 | 0.97  | 0 |
| CFP      | 0 | -0.5126683 | 0.091 | 0.379 | 0 |
| STXBP2   | 0 | -0.5422532 | 0.625 | 0.831 | 0 |
| GMFG     | 0 | -0.5634486 | 0.874 | 0.98  | 0 |
| GPD1     | 0 | -0.5672217 | 0.032 | 0.31  | 0 |
| FPR2     | 0 | -0.573271  | 0.127 | 0.456 | 0 |
| RNF149   | 0 | -0.5794345 | 0.624 | 0.885 | 0 |
| C1orf162 | 0 | -0.5874301 | 0.758 | 0.961 | 0 |
| H3F3A    | 0 | -0.600519  | 0.999 | 1     | 0 |
| JAML     | 0 | -0.640395  | 0.335 | 0.708 | 0 |
| PTPRC    | 0 | -0.671235  | 0.874 | 0.987 | 0 |
| CARD16   | 0 | -0.6737809 | 0.346 | 0.745 | 0 |
| MNDA     | 0 | -0.6797795 | 0.706 | 0.881 | 0 |
| AIF1     | 0 | -0.7142885 | 0.859 | 0.99  | 0 |
| COTL1    | 0 | -0.7429942 | 0.923 | 0.992 | 0 |
| PLAC8    | 0 | -0.7472429 | 0.05  | 0.347 | 0 |
| GCA      | 0 | -0.7675869 | 0.502 | 0.813 | 0 |
| S100A4   | 0 | -0.7840723 | 0.902 | 0.991 | 0 |

|          |           |            |       |       |           |
|----------|-----------|------------|-------|-------|-----------|
| FPR1     | 0         | -0.7915844 | 0.422 | 0.749 | 0         |
| SRGN     | 0         | -0.8214736 | 0.985 | 0.999 | 0         |
| SAMSN1   | 0         | -0.8778139 | 0.455 | 0.703 | 0         |
| LST1     | 0         | -0.9464915 | 0.703 | 0.957 | 0         |
| SERPINA1 | 0         | -0.9632203 | 0.66  | 0.94  | 0         |
| NAMPT    | 0         | -1.2272641 | 0.826 | 0.902 | 0         |
| VCAN     | 0         | -1.4342003 | 0.376 | 0.689 | 0         |
| THBS1    | 0         | -1.5791207 | 0.202 | 0.686 | 0         |
| ATP6AP1  | 4.71E-307 | 0.37032484 | 0.96  | 0.863 | 1.17E-302 |
| A2M      | 1.53E-305 | 0.68178932 | 0.579 | 0.266 | 3.78E-301 |
| PLTP     | 2.75E-304 | 0.62573174 | 0.401 | 0.1   | 6.81E-300 |
| TNS3     | 3.09E-303 | 0.4284252  | 0.636 | 0.314 | 7.65E-299 |
| GALM     | 1.13E-301 | 0.32924089 | 0.384 | 0.09  | 2.79E-297 |
| DNAJA1   | 1.28E-301 | -0.4246369 | 0.862 | 0.956 | 3.16E-297 |
| IFITM2   | 8.60E-300 | -1.2187791 | 0.222 | 0.497 | 2.13E-295 |
| HTRA4    | 3.60E-298 | 0.32862341 | 0.311 | 0.045 | 8.91E-294 |
| FPR3     | 4.17E-298 | 0.47034192 | 0.623 | 0.285 | 1.03E-293 |
| IL1B     | 1.64E-297 | -0.8712155 | 0.126 | 0.419 | 4.06E-293 |
| CSTA     | 3.01E-296 | -0.4696765 | 0.579 | 0.782 | 7.45E-292 |
| GBP2     | 3.44E-295 | -0.5074353 | 0.245 | 0.547 | 8.51E-291 |
| ADGRE1   | 1.69E-290 | -0.3186753 | 0.028 | 0.262 | 4.18E-286 |
| HSD3B7   | 6.79E-289 | 0.4205029  | 0.552 | 0.234 | 1.68E-284 |
| GPX4     | 1.61E-287 | 0.41200394 | 0.996 | 0.982 | 3.99E-283 |
| CHIT1    | 1.44E-282 | 2.05506673 | 0.381 | 0.107 | 3.57E-278 |
| HAMP     | 5.22E-280 | 0.68632384 | 0.261 | 0.025 | 1.29E-275 |
| CD9      | 9.88E-279 | 0.47675754 | 0.95  | 0.731 | 2.45E-274 |
| P2RX4    | 1.42E-278 | 0.39167489 | 0.732 | 0.423 | 3.52E-274 |
| BCAT1    | 1.45E-278 | 0.40652412 | 0.71  | 0.385 | 3.60E-274 |
| MGLL     | 1.75E-277 | 0.56238673 | 0.602 | 0.311 | 4.34E-273 |
| FCN1     | 1.39E-276 | -1.228757  | 0.243 | 0.495 | 3.44E-272 |
| FABP4    | 1.04E-275 | -1.3313219 | 0.284 | 0.565 | 2.58E-271 |
| SVIL     | 7.95E-274 | -0.4416509 | 0.181 | 0.46  | 1.97E-269 |
| PDLIM1   | 1.24E-273 | -0.5315685 | 0.186 | 0.471 | 3.07E-269 |
| NR1H3    | 1.31E-272 | 0.51063945 | 0.473 | 0.177 | 3.25E-268 |
| BCAP31   | 1.68E-272 | 0.42660214 | 0.938 | 0.835 | 4.16E-268 |
| DDX5     | 1.49E-269 | -0.3445147 | 0.982 | 0.998 | 3.69E-265 |
| CXXC5    | 6.41E-268 | 0.34414853 | 0.462 | 0.164 | 1.59E-263 |
| DOCK8    | 6.13E-267 | -0.3914296 | 0.477 | 0.705 | 1.52E-262 |
| CD300E   | 1.61E-266 | -0.6492968 | 0.099 | 0.355 | 3.99E-262 |
| PRELID1  | 7.00E-266 | -0.424959  | 0.835 | 0.941 | 1.73E-261 |
| MFSD12   | 1.88E-265 | 0.5470121  | 0.734 | 0.465 | 4.64E-261 |
| PLA2G16  | 3.72E-263 | -0.5049229 | 0.206 | 0.472 | 9.22E-259 |
| PMP22    | 9.56E-261 | 0.48866967 | 0.655 | 0.359 | 2.37E-256 |
| ANXA4    | 2.96E-259 | 0.42564796 | 0.801 | 0.586 | 7.33E-255 |
| RNF130   | 4.54E-258 | 0.32205629 | 0.952 | 0.874 | 1.12E-253 |

|           |           |            |       |       |           |
|-----------|-----------|------------|-------|-------|-----------|
| DDIT4     | 1.36E-256 | -0.7096592 | 0.314 | 0.574 | 3.38E-252 |
| FTL       | 6.86E-256 | 0.49491379 | 1     | 1     | 1.70E-251 |
| RIPOR2    | 7.56E-256 | -0.6353282 | 0.074 | 0.314 | 1.87E-251 |
| ALDH2     | 2.60E-254 | -0.7764335 | 0.735 | 0.881 | 6.44E-250 |
| SLAMF8    | 4.50E-253 | 0.35549544 | 0.577 | 0.27  | 1.11E-248 |
| GDF15     | 2.43E-252 | 0.88382733 | 0.373 | 0.106 | 6.02E-248 |
| RAB42     | 7.45E-252 | 0.30832895 | 0.379 | 0.107 | 1.84E-247 |
| RARRES1   | 4.79E-249 | 0.65955254 | 0.279 | 0.047 | 1.18E-244 |
| MRAS      | 1.01E-248 | 0.37703247 | 0.497 | 0.203 | 2.51E-244 |
| IGFBP2    | 1.10E-248 | -0.7075994 | 0.097 | 0.344 | 2.73E-244 |
| TMEM251   | 6.40E-248 | 0.37654616 | 0.69  | 0.39  | 1.58E-243 |
| CTSK      | 3.76E-247 | 1.61375342 | 0.283 | 0.052 | 9.31E-243 |
| S100A12   | 6.66E-247 | -1.8562079 | 0.058 | 0.283 | 1.65E-242 |
| HBEGF     | 6.27E-245 | -0.5343931 | 0.466 | 0.709 | 1.55E-240 |
| C15orf48  | 4.94E-244 | 0.65099069 | 0.596 | 0.305 | 1.22E-239 |
| NPL       | 9.65E-244 | 0.37905479 | 0.725 | 0.432 | 2.39E-239 |
| S100A8    | 9.81E-244 | -2.4843036 | 0.51  | 0.721 | 2.43E-239 |
| PECAM1    | 2.67E-243 | -0.388885  | 0.516 | 0.742 | 6.60E-239 |
| KIAA0930  | 8.56E-243 | 0.44332478 | 0.703 | 0.426 | 2.12E-238 |
| HMGA1     | 1.12E-242 | 0.45294599 | 0.634 | 0.346 | 2.77E-238 |
| LINC01857 | 7.35E-240 | 0.27210314 | 0.28  | 0.049 | 1.82E-235 |
| PRDX1     | 8.52E-240 | 0.35903028 | 0.994 | 0.973 | 2.11E-235 |
| CCL2      | 2.76E-239 | 1.45510482 | 0.369 | 0.111 | 6.83E-235 |
| TBC1D2    | 5.23E-239 | 0.32064678 | 0.524 | 0.228 | 1.29E-234 |
| SECTM1    | 4.25E-238 | -0.3124316 | 0.093 | 0.332 | 1.05E-233 |
| CCL3      | 4.26E-238 | 0.7656014  | 0.455 | 0.168 | 1.06E-233 |
| NTAN1     | 4.54E-238 | 0.40938519 | 0.668 | 0.384 | 1.12E-233 |
| TMSB4X    | 9.13E-238 | -0.3268051 | 1     | 1     | 2.26E-233 |
| RGS1      | 3.11E-237 | 0.42126168 | 0.626 | 0.317 | 7.69E-233 |
| ATOX1     | 2.14E-236 | 0.40261167 | 0.9   | 0.791 | 5.29E-232 |
| TDP2      | 2.16E-236 | 0.32298728 | 0.537 | 0.24  | 5.34E-232 |
| ICAM3     | 3.52E-236 | -0.3826151 | 0.079 | 0.311 | 8.72E-232 |
| CCR1      | 1.16E-235 | 0.35963281 | 0.69  | 0.383 | 2.87E-231 |
| RPS13     | 6.11E-235 | -0.2896219 | 0.999 | 1     | 1.51E-230 |
| RASSF5    | 6.23E-235 | -0.3397226 | 0.173 | 0.429 | 1.54E-230 |
| ADAM9     | 2.82E-234 | 0.33701222 | 0.678 | 0.38  | 6.98E-230 |
| SLC38A6   | 5.49E-234 | 0.28609527 | 0.498 | 0.206 | 1.36E-229 |
| RASGRP2   | 3.61E-233 | -0.2638157 | 0.09  | 0.328 | 8.93E-229 |
| AMDHD2    | 5.14E-230 | 0.28718836 | 0.494 | 0.204 | 1.27E-225 |
| PDE4B     | 5.68E-230 | -0.5932724 | 0.136 | 0.375 | 1.41E-225 |
| FABP5     | 2.93E-229 | 0.58765988 | 0.97  | 0.875 | 7.25E-225 |
| VASP      | 1.79E-227 | -0.3254112 | 0.761 | 0.909 | 4.42E-223 |
| VSIR      | 9.37E-226 | -0.6383266 | 0.288 | 0.512 | 2.32E-221 |
| RRAGD     | 2.04E-225 | 0.32614544 | 0.678 | 0.384 | 5.04E-221 |
| YWHAB     | 2.54E-224 | -0.3001529 | 0.946 | 0.99  | 6.29E-220 |

|           |           |            |       |       |           |
|-----------|-----------|------------|-------|-------|-----------|
| CCND3     | 4.91E-223 | -0.3630701 | 0.265 | 0.517 | 1.22E-218 |
| MCL1      | 5.49E-223 | -0.4722456 | 0.892 | 0.974 | 1.36E-218 |
| CPM       | 1.47E-221 | 0.57110273 | 0.819 | 0.682 | 3.64E-217 |
| TNS1      | 1.59E-221 | 0.26156055 | 0.364 | 0.108 | 3.93E-217 |
| ABHD12    | 2.04E-221 | 0.32796607 | 0.639 | 0.364 | 5.06E-217 |
| TKT       | 4.18E-221 | -0.3743125 | 0.903 | 0.966 | 1.03E-216 |
| S100A9    | 8.24E-220 | -1.810577  | 0.894 | 0.94  | 2.04E-215 |
| MMP9      | 1.82E-219 | 1.41745991 | 0.274 | 0.054 | 4.52E-215 |
| ACP2      | 2.29E-219 | 0.3672214  | 0.547 | 0.274 | 5.67E-215 |
| ANXA2     | 2.60E-219 | 0.37330542 | 0.997 | 0.987 | 6.43E-215 |
| CTSA      | 2.68E-218 | 0.35610821 | 0.91  | 0.796 | 6.64E-214 |
| LIPA      | 7.83E-217 | 0.56503421 | 0.902 | 0.811 | 1.94E-212 |
| PNRC1     | 1.26E-214 | -0.6379026 | 0.709 | 0.815 | 3.12E-210 |
| SLC29A1   | 6.09E-214 | 0.29651108 | 0.405 | 0.15  | 1.51E-209 |
| SQSTM1    | 1.71E-212 | 0.40408558 | 0.945 | 0.852 | 4.23E-208 |
| SERPINB1  | 3.28E-212 | -0.550497  | 0.806 | 0.899 | 8.13E-208 |
| BLVRB     | 1.10E-211 | 0.39019727 | 0.912 | 0.774 | 2.72E-207 |
| HAGHL     | 1.55E-211 | 0.25004707 | 0.349 | 0.104 | 3.85E-207 |
| SDS       | 1.88E-211 | 0.45191823 | 0.312 | 0.079 | 4.65E-207 |
| STK17B    | 5.43E-210 | -0.463656  | 0.333 | 0.566 | 1.34E-205 |
| SERPINB9  | 1.49E-209 | -0.5183468 | 0.138 | 0.361 | 3.69E-205 |
| TCF7L2    | 2.01E-209 | -0.3958265 | 0.265 | 0.506 | 4.99E-205 |
| TMEM173   | 1.23E-208 | -0.3198573 | 0.191 | 0.437 | 3.05E-204 |
| GLMP      | 3.89E-208 | 0.30358666 | 0.537 | 0.26  | 9.62E-204 |
| FGL2      | 3.71E-207 | -0.7413931 | 0.286 | 0.507 | 9.18E-203 |
| MAPK13    | 9.15E-205 | 0.26332013 | 0.401 | 0.148 | 2.27E-200 |
| AQP3      | 1.48E-204 | -0.4886994 | 0.156 | 0.389 | 3.65E-200 |
| CD93      | 2.65E-204 | -0.5485112 | 0.17  | 0.411 | 6.55E-200 |
| SMIM3     | 2.74E-204 | 0.30898037 | 0.523 | 0.234 | 6.78E-200 |
| SLC16A6   | 3.83E-204 | 0.35964868 | 0.413 | 0.159 | 9.47E-200 |
| PSMB9     | 1.34E-203 | -0.3441938 | 0.551 | 0.752 | 3.33E-199 |
| HNRNPA2B1 | 4.04E-203 | -0.3189031 | 0.95  | 0.991 | 1.00E-198 |
| MYH9      | 5.20E-203 | -0.3193223 | 0.544 | 0.752 | 1.29E-198 |
| CAT       | 1.49E-202 | -0.3103236 | 0.58  | 0.749 | 3.69E-198 |
| HCLS1     | 1.28E-201 | -0.3693217 | 0.652 | 0.798 | 3.18E-197 |
| MPP1      | 1.11E-197 | 0.32033468 | 0.822 | 0.61  | 2.75E-193 |
| MGAT1     | 1.20E-197 | 0.28778402 | 0.944 | 0.855 | 2.98E-193 |
| RAP2B     | 1.26E-197 | 0.33184488 | 0.722 | 0.444 | 3.13E-193 |
| TSPAN4    | 5.95E-197 | 0.39830915 | 0.568 | 0.318 | 1.47E-192 |
| TTYH3     | 1.48E-196 | 0.32121879 | 0.579 | 0.297 | 3.67E-192 |
| ACTB      | 5.83E-196 | -0.3372333 | 1     | 1     | 1.44E-191 |
| SLC39A11  | 3.06E-195 | 0.27346783 | 0.428 | 0.175 | 7.57E-191 |
| SERP1     | 1.11E-194 | -0.323049  | 0.95  | 0.985 | 2.74E-190 |
| PABPC1    | 1.54E-193 | -0.3500797 | 0.99  | 0.999 | 3.81E-189 |
| CD55      | 4.44E-192 | -0.6301242 | 0.678 | 0.816 | 1.10E-187 |

|          |           |            |       |       |           |
|----------|-----------|------------|-------|-------|-----------|
| DBI      | 8.23E-192 | 0.34120049 | 0.982 | 0.962 | 2.04E-187 |
| LGALS3BP | 2.66E-191 | -0.4651822 | 0.234 | 0.459 | 6.59E-187 |
| SSH2     | 4.29E-191 | -0.3207286 | 0.274 | 0.509 | 1.06E-186 |
| PARAL1   | 4.35E-190 | -0.2565125 | 0.077 | 0.278 | 1.08E-185 |
| JUNB     | 3.03E-189 | -0.5155824 | 0.931 | 0.959 | 7.51E-185 |
| SEMA3C   | 1.57E-188 | 0.32178463 | 0.478 | 0.222 | 3.88E-184 |
| IL4I1    | 2.35E-188 | 0.28553092 | 0.302 | 0.082 | 5.81E-184 |
| SLC1A3   | 2.75E-188 | 0.33094586 | 0.639 | 0.359 | 6.80E-184 |
| TREM1    | 3.19E-188 | -0.4789112 | 0.466 | 0.648 | 7.90E-184 |
| LDHB     | 9.86E-187 | -0.3824716 | 0.579 | 0.76  | 2.44E-182 |
| CYFIP1   | 4.53E-186 | 0.32760831 | 0.726 | 0.496 | 1.12E-181 |
| B3GNT2   | 1.32E-184 | 0.28034873 | 0.474 | 0.22  | 3.27E-180 |
| BTG1     | 3.05E-184 | -0.5500398 | 0.885 | 0.939 | 7.55E-180 |
| CD99     | 1.66E-183 | 0.37721837 | 0.852 | 0.719 | 4.11E-179 |
| LILRA5   | 2.40E-183 | -0.3982228 | 0.119 | 0.321 | 5.94E-179 |
| INHBA    | 2.57E-183 | -0.7950347 | 0.144 | 0.364 | 6.36E-179 |
| AKAP13   | 3.98E-183 | -0.3121442 | 0.753 | 0.903 | 9.85E-179 |
| H2AFY    | 5.69E-183 | 0.27378436 | 0.984 | 0.967 | 1.41E-178 |
| SMS      | 6.36E-181 | 0.33655427 | 0.779 | 0.593 | 1.57E-176 |
| PLIN2    | 1.17E-179 | 0.55266882 | 0.969 | 0.923 | 2.90E-175 |
| BTG2     | 3.45E-179 | -0.3972782 | 0.252 | 0.482 | 8.54E-175 |
| SLC43A3  | 1.05E-177 | 0.32580874 | 0.574 | 0.323 | 2.59E-173 |
| KCNMA1   | 2.55E-177 | 0.32680628 | 0.462 | 0.215 | 6.32E-173 |
| BCL2L1   | 3.55E-176 | 0.26562704 | 0.493 | 0.241 | 8.79E-172 |
| MYO1G    | 8.20E-176 | -0.3399624 | 0.305 | 0.53  | 2.03E-171 |
| MAP3K8   | 1.26E-175 | -0.502011  | 0.47  | 0.642 | 3.13E-171 |
| PIK3IP1  | 6.61E-175 | 0.26109099 | 0.368 | 0.141 | 1.64E-170 |
| CD164    | 9.53E-175 | 0.2953181  | 0.976 | 0.937 | 2.36E-170 |
| PSME2    | 3.73E-174 | -0.2941748 | 0.762 | 0.886 | 9.23E-170 |
| FHL1     | 7.53E-174 | -0.289329  | 0.07  | 0.259 | 1.86E-169 |
| ACTR2    | 7.75E-173 | -0.2945305 | 0.936 | 0.987 | 1.92E-168 |
| CYSTM1   | 1.23E-172 | 0.2733699  | 0.793 | 0.587 | 3.03E-168 |
| CD302    | 3.66E-172 | -0.3192942 | 0.343 | 0.562 | 9.07E-168 |
| GBA      | 3.87E-171 | 0.25970703 | 0.515 | 0.263 | 9.58E-167 |
| CORO1A   | 5.31E-168 | -0.5835326 | 0.337 | 0.505 | 1.31E-163 |
| H2AFZ    | 7.96E-168 | -0.2792069 | 0.89  | 0.956 | 1.97E-163 |
| UGCG     | 7.39E-167 | 0.3113226  | 0.477 | 0.234 | 1.83E-162 |
| PLEKHM2  | 1.16E-166 | 0.26569967 | 0.57  | 0.319 | 2.87E-162 |
| STAT3    | 2.14E-166 | -0.3953776 | 0.535 | 0.709 | 5.29E-162 |
| CSF1     | 2.61E-166 | 0.39903818 | 0.304 | 0.097 | 6.45E-162 |
| GLDN     | 3.84E-166 | -0.4598394 | 0.118 | 0.316 | 9.51E-162 |
| RDX      | 8.59E-166 | 0.35457941 | 0.698 | 0.479 | 2.13E-161 |
| LILRB5   | 2.09E-165 | 0.33003772 | 0.254 | 0.067 | 5.18E-161 |
| PHLDA1   | 9.93E-165 | 0.42572931 | 0.498 | 0.261 | 2.46E-160 |
| LGALS1   | 2.56E-164 | 0.36146917 | 0.991 | 0.989 | 6.33E-160 |

|            |           |            |       |       |           |
|------------|-----------|------------|-------|-------|-----------|
| IRAK1      | 1.15E-163 | 0.30573486 | 0.642 | 0.399 | 2.86E-159 |
| CASP4      | 4.77E-162 | -0.3263954 | 0.509 | 0.697 | 1.18E-157 |
| SNTB1      | 5.84E-162 | 0.27775542 | 0.535 | 0.289 | 1.45E-157 |
| HCK        | 1.86E-161 | -0.3267877 | 0.538 | 0.686 | 4.60E-157 |
| P2RX7      | 9.79E-161 | 0.28652241 | 0.501 | 0.26  | 2.42E-156 |
| PCOLCE2    | 3.56E-160 | -0.5381262 | 0.191 | 0.385 | 8.81E-156 |
| SUB1       | 4.52E-160 | -0.2977937 | 0.886 | 0.945 | 1.12E-155 |
| MXD1       | 7.57E-160 | -0.5590205 | 0.322 | 0.507 | 1.87E-155 |
| SYAP1      | 1.72E-158 | -0.3909113 | 0.399 | 0.59  | 4.25E-154 |
| MCEMP1     | 5.67E-158 | -0.6242825 | 0.452 | 0.623 | 1.40E-153 |
| QSOX1      | 1.02E-157 | -0.2945902 | 0.357 | 0.559 | 2.53E-153 |
| LDHA       | 5.51E-157 | -0.2970591 | 0.834 | 0.934 | 1.36E-152 |
| GNPDA1     | 1.19E-156 | 0.26935512 | 0.587 | 0.342 | 2.94E-152 |
| AC026369.3 | 5.53E-156 | -0.5639398 | 0.186 | 0.387 | 1.37E-151 |
| FAIM       | 3.60E-155 | 0.30118638 | 0.339 | 0.133 | 8.90E-151 |
| LRRK2      | 1.21E-154 | -0.400623  | 0.128 | 0.314 | 3.00E-150 |
| IER5       | 2.16E-154 | -0.3536771 | 0.542 | 0.717 | 5.34E-150 |
| FCGR3A     | 2.37E-154 | -0.5321294 | 0.636 | 0.78  | 5.86E-150 |
| TBXAS1     | 4.34E-154 | -0.2900805 | 0.571 | 0.73  | 1.07E-149 |
| TOMM40     | 1.72E-153 | 0.39772845 | 0.581 | 0.368 | 4.25E-149 |
| GPSM3      | 3.85E-153 | -0.3029381 | 0.725 | 0.822 | 9.53E-149 |
| CD276      | 1.61E-152 | 0.28210067 | 0.447 | 0.221 | 3.98E-148 |
| TUBA1C     | 2.58E-152 | 0.33534493 | 0.797 | 0.647 | 6.39E-148 |
| AGFG1      | 5.07E-152 | -0.3446315 | 0.494 | 0.653 | 1.26E-147 |
| DOK2       | 6.96E-152 | -0.3026855 | 0.559 | 0.71  | 1.72E-147 |
| CMTM6      | 2.39E-151 | -0.3162408 | 0.77  | 0.901 | 5.92E-147 |
| MPEG1      | 6.18E-151 | -0.4583224 | 0.276 | 0.468 | 1.53E-146 |
| LY6E       | 3.39E-150 | -0.3729586 | 0.568 | 0.739 | 8.40E-146 |
| PABPC4     | 3.04E-149 | 0.33831631 | 0.81  | 0.628 | 7.52E-145 |
| ALCAM      | 3.91E-149 | 0.43970312 | 0.775 | 0.627 | 9.69E-145 |
| CLN8       | 3.47E-148 | 0.26035941 | 0.607 | 0.363 | 8.60E-144 |
| VMP1       | 6.11E-148 | -0.4284042 | 0.64  | 0.778 | 1.51E-143 |
| IER2       | 7.50E-147 | -0.5136291 | 0.453 | 0.633 | 1.86E-142 |
| SEPHS2     | 2.20E-142 | 0.2748077  | 0.617 | 0.395 | 5.45E-138 |
| ATP6V1A    | 1.65E-141 | 0.33432152 | 0.726 | 0.539 | 4.09E-137 |
| ZFYVE16    | 2.34E-141 | 0.3423378  | 0.718 | 0.512 | 5.78E-137 |
| DPP7       | 4.92E-140 | 0.25094707 | 0.907 | 0.824 | 1.22E-135 |
| FCHO2      | 2.42E-139 | 0.30633731 | 0.606 | 0.395 | 5.99E-135 |
| DECR1      | 1.22E-138 | -0.3472584 | 0.576 | 0.697 | 3.01E-134 |
| RSRP1      | 3.58E-138 | -0.3360966 | 0.649 | 0.774 | 8.86E-134 |
| VEGFB      | 7.56E-137 | 0.28450246 | 0.754 | 0.556 | 1.87E-132 |
| IL1RAP     | 5.78E-136 | -0.2936839 | 0.201 | 0.396 | 1.43E-131 |
| RETN       | 1.29E-134 | -0.6014029 | 0.309 | 0.513 | 3.18E-130 |
| PNPLA6     | 4.82E-134 | -0.3515641 | 0.45  | 0.596 | 1.19E-129 |
| SLC2A3     | 1.62E-133 | -0.7640797 | 0.614 | 0.72  | 4.01E-129 |

|          |           |            |       |       |           |
|----------|-----------|------------|-------|-------|-----------|
| AOAH     | 6.50E-133 | -0.292795  | 0.186 | 0.368 | 1.61E-128 |
| EVL      | 1.66E-132 | -0.3566484 | 0.43  | 0.602 | 4.10E-128 |
| SPARC    | 1.94E-129 | 0.45013788 | 0.299 | 0.124 | 4.80E-125 |
| TXN      | 2.17E-129 | 0.28144874 | 0.99  | 0.953 | 5.37E-125 |
| CD109    | 4.64E-129 | 0.25335648 | 0.37  | 0.174 | 1.15E-124 |
| TXNIP    | 9.50E-129 | -0.3853229 | 0.882 | 0.941 | 2.35E-124 |
| TMEM70   | 1.05E-128 | 0.25120757 | 0.633 | 0.413 | 2.59E-124 |
| CD81     | 1.07E-128 | 0.26521269 | 0.982 | 0.918 | 2.66E-124 |
| FTH1     | 1.18E-128 | 0.27103841 | 1     | 1     | 2.92E-124 |
| SFPQ     | 2.62E-128 | -0.316379  | 0.649 | 0.789 | 6.48E-124 |
| NRP1     | 9.28E-128 | 0.30209709 | 0.498 | 0.291 | 2.30E-123 |
| AREG     | 1.07E-127 | -0.9040263 | 0.499 | 0.672 | 2.64E-123 |
| SLC25A37 | 1.42E-127 | -0.6675869 | 0.273 | 0.437 | 3.51E-123 |
| PPA1     | 5.98E-127 | -0.259428  | 0.372 | 0.568 | 1.48E-122 |
| HNRNPA1  | 9.95E-126 | -0.2544186 | 0.867 | 0.925 | 2.46E-121 |
| RBP7     | 1.40E-125 | -0.3113413 | 0.197 | 0.381 | 3.47E-121 |
| TNFSF10  | 2.63E-124 | -0.2956749 | 0.097 | 0.258 | 6.51E-120 |
| NLRP3    | 5.24E-124 | -0.4405582 | 0.173 | 0.344 | 1.30E-119 |
| IRAK3    | 3.07E-123 | -0.351736  | 0.569 | 0.704 | 7.60E-119 |
| MME      | 3.94E-123 | -0.3756911 | 0.119 | 0.282 | 9.76E-119 |
| IDI1     | 1.67E-122 | -0.3459858 | 0.293 | 0.465 | 4.13E-118 |
| CD52     | 1.95E-122 | -0.3804237 | 0.819 | 0.919 | 4.83E-118 |
| ALOX5AP  | 2.89E-122 | -0.5811698 | 0.743 | 0.782 | 7.16E-118 |
| ETS2     | 4.25E-122 | -0.3232972 | 0.564 | 0.721 | 1.05E-117 |
| FDX1     | 6.27E-122 | 0.6216157  | 0.711 | 0.58  | 1.55E-117 |
| SOCS3    | 9.64E-122 | -0.7351825 | 0.533 | 0.615 | 2.39E-117 |
| TMEM176B | 1.97E-121 | 0.40150637 | 0.304 | 0.129 | 4.87E-117 |
| SERPING1 | 3.18E-120 | -0.5406502 | 0.209 | 0.379 | 7.87E-116 |
| ITGB1BP1 | 6.17E-120 | 0.34342988 | 0.588 | 0.403 | 1.53E-115 |
| MITF     | 9.44E-120 | 0.25078319 | 0.576 | 0.355 | 2.34E-115 |
| LIMS1    | 2.36E-119 | 0.26420503 | 0.923 | 0.863 | 5.84E-115 |
| TXNRD1   | 8.18E-119 | 0.29897977 | 0.582 | 0.383 | 2.02E-114 |
| HIPK2    | 2.49E-118 | -0.2787564 | 0.383 | 0.555 | 6.18E-114 |
| FCGR2B   | 1.31E-117 | 0.30770345 | 0.461 | 0.245 | 3.25E-113 |
| SDC4     | 2.56E-117 | 0.26223122 | 0.45  | 0.243 | 6.34E-113 |
| ALOX5    | 1.48E-116 | -0.4077473 | 0.621 | 0.687 | 3.65E-112 |
| MIDN     | 1.05E-115 | -0.3474402 | 0.45  | 0.597 | 2.60E-111 |
| HSD17B11 | 1.29E-115 | -0.2623263 | 0.439 | 0.593 | 3.18E-111 |
| POU2F2   | 1.98E-115 | -0.4001217 | 0.153 | 0.311 | 4.91E-111 |
| CCDC69   | 2.04E-115 | -0.2841773 | 0.119 | 0.273 | 5.05E-111 |
| SRSF5    | 2.47E-115 | -0.2554404 | 0.743 | 0.856 | 6.12E-111 |
| NFKBIA   | 7.34E-115 | -0.5984232 | 0.845 | 0.896 | 1.82E-110 |
| PLBD1    | 1.77E-114 | -0.3937461 | 0.656 | 0.743 | 4.37E-110 |
| WSB1     | 3.28E-114 | -0.3353882 | 0.762 | 0.853 | 8.13E-110 |
| ATF3     | 7.98E-114 | 0.39273091 | 0.72  | 0.561 | 1.98E-109 |



|          |           |            |       |       |           |
|----------|-----------|------------|-------|-------|-----------|
| CLEC7A   | 6.43E-112 | -0.2664206 | 0.621 | 0.765 | 1.59E-107 |
| FKBP5    | 8.87E-112 | -0.2751117 | 0.647 | 0.796 | 2.20E-107 |
| TSPO     | 1.01E-111 | -0.2937363 | 0.988 | 0.993 | 2.49E-107 |
| CCRL2    | 1.62E-110 | 0.28005635 | 0.51  | 0.302 | 4.01E-106 |
| IFITM3   | 2.73E-110 | -0.5674859 | 0.404 | 0.559 | 6.76E-106 |
| MT2A     | 9.56E-110 | -0.651098  | 0.625 | 0.803 | 2.37E-105 |
| RNASET2  | 9.90E-110 | -0.2578383 | 0.764 | 0.883 | 2.45E-105 |
| CHD1     | 1.08E-109 | -0.4048081 | 0.456 | 0.588 | 2.68E-105 |
| CD83     | 2.37E-109 | 0.25035457 | 0.772 | 0.571 | 5.88E-105 |
| LYZ      | 2.46E-109 | -0.5777292 | 0.99  | 0.993 | 6.08E-105 |
| GNB4     | 3.14E-109 | 0.26076909 | 0.687 | 0.51  | 7.77E-105 |
| NEAT1    | 4.51E-109 | -0.405384  | 0.997 | 0.999 | 1.12E-104 |
| TUBB     | 4.51E-109 | 0.29154489 | 0.871 | 0.8   | 1.12E-104 |
| FAM89A   | 1.21E-107 | -0.4344733 | 0.307 | 0.451 | 2.99E-103 |
| NDUFB9   | 4.95E-107 | 0.27429478 | 0.817 | 0.711 | 1.23E-102 |
| ABL2     | 8.21E-107 | 0.30605654 | 0.569 | 0.371 | 2.03E-102 |
| NPM1     | 3.90E-106 | 0.27182553 | 0.99  | 0.974 | 9.65E-102 |
| C1QA     | 1.30E-105 | -0.6287805 | 0.752 | 0.814 | 3.23E-101 |
| FOLR2    | 4.04E-105 | 0.53755257 | 0.308 | 0.146 | 1.00E-100 |
| G0S2     | 6.55E-105 | -1.1640951 | 0.166 | 0.318 | 1.62E-100 |
| NR4A1    | 2.52E-104 | -0.2640792 | 0.352 | 0.527 | 6.24E-100 |
| RGCC     | 4.48E-104 | 0.59506217 | 0.829 | 0.73  | 1.11E-99  |
| GBP1     | 8.86E-104 | -0.4038613 | 0.269 | 0.435 | 2.19E-99  |
| PELI1    | 1.43E-103 | -0.3606114 | 0.249 | 0.405 | 3.55E-99  |
| ARL4A    | 2.58E-103 | -0.2613552 | 0.574 | 0.712 | 6.38E-99  |
| HEBP1    | 2.76E-103 | 0.25729245 | 0.567 | 0.379 | 6.82E-99  |
| CPVL     | 7.04E-103 | -0.2711685 | 0.705 | 0.841 | 1.74E-98  |
| BAZ1A    | 1.51E-101 | -0.2719112 | 0.596 | 0.713 | 3.73E-97  |
| GLA      | 3.65E-101 | 0.25584872 | 0.647 | 0.461 | 9.04E-97  |
| DUSP1    | 4.32E-101 | -0.3486558 | 0.971 | 0.991 | 1.07E-96  |
| EHD1     | 1.64E-100 | -0.2951381 | 0.142 | 0.292 | 4.07E-96  |
| CCL18    | 1.11E-98  | 0.41590301 | 0.798 | 0.658 | 2.76E-94  |
| NUPR1    | 2.13E-98  | 0.63474571 | 0.591 | 0.457 | 5.26E-94  |
| SLC16A10 | 6.57E-97  | 0.25942325 | 0.508 | 0.312 | 1.63E-92  |
| S100A13  | 1.23E-96  | -0.2603258 | 0.188 | 0.345 | 3.03E-92  |
| SMAP2    | 5.97E-96  | -0.3614773 | 0.555 | 0.658 | 1.48E-91  |
| CALM3    | 1.17E-95  | 0.51700846 | 0.808 | 0.748 | 2.90E-91  |
| ABHD5    | 4.95E-95  | -0.3491877 | 0.623 | 0.729 | 1.22E-90  |
| RNF144B  | 7.36E-95  | -0.3451512 | 0.31  | 0.462 | 1.82E-90  |
| PLEKHO1  | 1.31E-94  | 0.34727567 | 0.563 | 0.377 | 3.25E-90  |
| IRS2     | 4.52E-94  | -0.2978481 | 0.499 | 0.63  | 1.12E-89  |
| STOM     | 6.12E-94  | -0.2535777 | 0.52  | 0.65  | 1.51E-89  |
| CD59     | 1.16E-92  | 0.28746567 | 0.632 | 0.491 | 2.88E-88  |
| THBD     | 1.57E-92  | -0.3733755 | 0.347 | 0.511 | 3.89E-88  |
| ZFP36    | 1.25E-91  | -0.3507981 | 0.599 | 0.73  | 3.10E-87  |

|           |          |            |       |       |          |
|-----------|----------|------------|-------|-------|----------|
| LILRB2    | 4.28E-88 | -0.4360701 | 0.362 | 0.473 | 1.06E-83 |
| PFKFB3    | 1.46E-85 | -0.3663826 | 0.24  | 0.372 | 3.61E-81 |
| CALR      | 3.42E-85 | 0.30699074 | 0.949 | 0.919 | 8.47E-81 |
| VAMP5     | 4.97E-85 | -0.3337234 | 0.221 | 0.362 | 1.23E-80 |
| MAT2A     | 2.79E-84 | -0.3252308 | 0.554 | 0.664 | 6.91E-80 |
| PAG1      | 7.81E-84 | -0.3395577 | 0.532 | 0.638 | 1.93E-79 |
| PTP4A2    | 1.88E-83 | -0.2882724 | 0.792 | 0.853 | 4.65E-79 |
| CREM      | 2.62E-83 | -0.4425203 | 0.464 | 0.565 | 6.49E-79 |
| MS4A4A    | 5.07E-83 | 0.34005865 | 0.859 | 0.8   | 1.26E-78 |
| LMNA      | 8.34E-83 | 0.32430642 | 0.865 | 0.725 | 2.07E-78 |
| H3F3B     | 2.24E-82 | -0.333954  | 0.998 | 1     | 5.53E-78 |
| JUN       | 3.82E-82 | 0.33834048 | 0.852 | 0.739 | 9.45E-78 |
| GYPC      | 7.51E-81 | -0.27646   | 0.49  | 0.585 | 1.86E-76 |
| CSF3R     | 4.25E-78 | -0.499928  | 0.266 | 0.382 | 1.05E-73 |
| SNHG12    | 1.60E-77 | 0.32126397 | 0.408 | 0.251 | 3.96E-73 |
| IRF1      | 4.79E-77 | -0.3315489 | 0.323 | 0.468 | 1.19E-72 |
| CSRNP1    | 7.97E-77 | -0.2577053 | 0.245 | 0.375 | 1.97E-72 |
| SELENOK   | 3.92E-76 | -0.2733484 | 0.686 | 0.77  | 9.70E-72 |
| SLA       | 7.78E-76 | -0.2502745 | 0.623 | 0.75  | 1.93E-71 |
| CYTIP     | 1.25E-75 | -0.2807678 | 0.492 | 0.608 | 3.10E-71 |
| PDIA6     | 2.82E-73 | 0.26687297 | 0.83  | 0.782 | 6.99E-69 |
| MAFB      | 1.54E-71 | 0.28469741 | 0.805 | 0.725 | 3.82E-67 |
| MAF       | 4.51E-71 | 0.25114254 | 0.45  | 0.291 | 1.12E-66 |
| CEBPD     | 4.42E-70 | -0.490261  | 0.658 | 0.711 | 1.09E-65 |
| ARID5B    | 4.62E-70 | 0.26854673 | 0.484 | 0.333 | 1.14E-65 |
| MIR3945HG | 7.56E-70 | -0.3031258 | 0.244 | 0.375 | 1.87E-65 |
| DUSP2     | 2.81E-69 | -0.5180478 | 0.283 | 0.391 | 6.95E-65 |
| METTL9    | 4.23E-69 | -0.2803547 | 0.344 | 0.474 | 1.05E-64 |
| FOSL2     | 4.90E-69 | -0.3271477 | 0.466 | 0.561 | 1.21E-64 |
| PTEN      | 5.11E-69 | -0.2625823 | 0.544 | 0.633 | 1.26E-64 |
| CTSC      | 2.50E-68 | -0.352499  | 0.908 | 0.939 | 6.18E-64 |
| TET2      | 2.57E-68 | -0.2947197 | 0.361 | 0.466 | 6.35E-64 |
| EREG      | 7.23E-68 | -0.6383399 | 0.212 | 0.339 | 1.79E-63 |
| SLC3A2    | 1.57E-67 | 0.31286135 | 0.867 | 0.801 | 3.87E-63 |
| LYN       | 3.58E-67 | -0.2947352 | 0.717 | 0.784 | 8.86E-63 |
| TIMP1     | 1.57E-65 | -0.3151243 | 0.784 | 0.867 | 3.89E-61 |
| CLEC4E    | 3.86E-65 | -0.2602974 | 0.279 | 0.405 | 9.56E-61 |
| TSC22D3   | 5.14E-65 | -0.2538901 | 0.784 | 0.873 | 1.27E-60 |
| HLA-DMB   | 5.66E-64 | 0.28695782 | 0.828 | 0.803 | 1.40E-59 |
| NAIP      | 1.27E-63 | -0.2643984 | 0.311 | 0.422 | 3.13E-59 |
| EGR1      | 2.15E-61 | -0.2811334 | 0.22  | 0.353 | 5.33E-57 |
| RGS2      | 8.70E-60 | -0.5026798 | 0.582 | 0.646 | 2.15E-55 |
| HMGB2     | 2.93E-59 | -0.308361  | 0.384 | 0.491 | 7.25E-55 |
| DDX3X     | 6.35E-59 | -0.261697  | 0.815 | 0.838 | 1.57E-54 |
| TNFAIP3   | 4.27E-58 | -0.4639416 | 0.337 | 0.444 | 1.06E-53 |

|            |            |            |       |       |            |
|------------|------------|------------|-------|-------|------------|
| SAT1       | 1.62E-56   | -0.3590372 | 0.999 | 1     | 4.02E-52   |
| MARCO      | 5.04E-53   | 0.27899682 | 0.818 | 0.737 | 1.25E-48   |
| TNFRSF1B   | 8.25E-53   | -0.458182  | 0.481 | 0.513 | 2.04E-48   |
| INSIG1     | 1.22E-52   | -0.3799061 | 0.267 | 0.367 | 3.01E-48   |
| C1QB       | 1.23E-52   | -0.4318164 | 0.746 | 0.806 | 3.06E-48   |
| C5AR1      | 1.51E-52   | -0.3249667 | 0.865 | 0.869 | 3.73E-48   |
| REL        | 1.08E-51   | -0.2567165 | 0.733 | 0.802 | 2.68E-47   |
| SMCHD1     | 1.44E-51   | -0.3028446 | 0.38  | 0.47  | 3.56E-47   |
| TUBA1A     | 3.86E-51   | -0.2913082 | 0.554 | 0.643 | 9.56E-47   |
| ADGRE2     | 9.06E-51   | -0.3056936 | 0.348 | 0.425 | 2.24E-46   |
| NFKBIZ     | 9.43E-48   | -0.2801429 | 0.281 | 0.387 | 2.34E-43   |
| SORL1      | 5.85E-45   | -0.2725228 | 0.256 | 0.352 | 1.45E-40   |
| RBP4       | 1.47E-44   | -0.5207285 | 0.18  | 0.272 | 3.63E-40   |
| BIRC3      | 8.52E-41   | -0.3216431 | 0.17  | 0.255 | 2.11E-36   |
| TFRC       | 4.20E-39   | 0.25730205 | 0.831 | 0.787 | 1.04E-34   |
| PTPRE      | 5.55E-34   | -0.2741711 | 0.546 | 0.563 | 1.37E-29   |
| CD36       | 2.34E-30   | 0.46255113 | 0.617 | 0.537 | 5.80E-26   |
| OSBPL8     | 4.53E-30   | 0.28745231 | 0.72  | 0.654 | 1.12E-25   |
| ADM        | 7.61E-28   | -0.3390722 | 0.279 | 0.347 | 1.88E-23   |
| IVNS1ABP   | 2.98E-27   | -0.2602157 | 0.58  | 0.625 | 7.37E-23   |
| SFTPC      | 1.74E-23   | -0.3766304 | 0.476 | 0.545 | 4.30E-19   |
| VEGFA      | 9.68E-22   | -0.3501774 | 0.269 | 0.318 | 2.40E-17   |
| HERPUD1    | 1.86E-18   | -0.255085  | 0.742 | 0.768 | 4.61E-14   |
| IGKC       | 2.70E-18   | 0.85307367 | 0.309 | 0.231 | 6.69E-14   |
| FN1        | 3.57E-15   | -0.474083  | 0.53  | 0.584 | 8.83E-11   |
| ZFP36L1    | 4.21E-15   | -0.3159468 | 0.66  | 0.635 | 1.04E-10   |
| CIR1       | 4.10E-12   | 0.4291816  | 0.554 | 0.52  | 1.01E-07   |
| CXCR4      | 3.17E-09   | -0.3902691 | 0.63  | 0.621 | 7.85E-05   |
| AC020656.1 | 6.07E-09   | -0.2659983 | 0.743 | 0.75  | 0.00015014 |
| CXCL8      | 4.17E-08   | -0.3535616 | 0.321 | 0.26  | 0.00103244 |
| FOS        | 9.49E-08   | -0.2514058 | 0.939 | 0.945 | 0.00234994 |
| IL1RN      | 0.21895846 | 0.47704469 | 0.333 | 0.363 | 1          |
| HMOX1      | 0.45708054 | 0.2602922  | 0.608 | 0.578 | 1          |
| SOD2       | 0.7963145  | -0.4847448 | 0.817 | 0.688 | 1          |
