# Supplementary material
Source: PubMed Central journal article supplement (PMC9771864)
Supplement: NIHMS1819536-supplement-Table_S3.pdf [file NIHMS1819536-supplement-Table_S3.pdf]

|            | p_val | avg_logFC  | pct.1 | pct.2 | p_val_adj |
|------------|-------|------------|-------|-------|-----------|
| FABP4      | 0     | 2.47870472 | 0.945 | 0.293 | 0         |
| INHBA      | 0     | 1.6574252  | 0.821 | 0.112 | 0         |
| FN1        | 0     | 1.61543118 | 0.88  | 0.479 | 0         |
| ALDH2      | 0     | 1.45009686 | 0.998 | 0.758 | 0         |
| MCEMP1     | 0     | 1.28880906 | 0.973 | 0.428 | 0         |
| RBP4       | 0     | 1.27815461 | 0.655 | 0.121 | 0         |
| AC026369.3 | 0     | 1.27796062 | 0.877 | 0.139 | 0         |
| IGFBP2     | 0     | 1.24849691 | 0.632 | 0.116 | 0         |
| C1QA       | 0     | 1.23945981 | 1     | 0.73  | 0         |
| FBP1       | 0     | 1.21144354 | 0.997 | 0.848 | 0         |
| PCOLCE2    | 0     | 1.19381802 | 0.905 | 0.135 | 0         |
| C1QB       | 0     | 1.16217625 | 0.996 | 0.722 | 0         |
| SERPINA1   | 0     | 1.13377267 | 0.999 | 0.746 | 0         |
| SERPING1   | 0     | 1.11913471 | 0.719 | 0.188 | 0         |
| ALOX5AP    | 0     | 1.11795564 | 0.994 | 0.706 | 0         |
| GPD1       | 0     | 1.08887943 | 0.757 | 0.023 | 0         |
| FAM89A     | 0     | 1.0819947  | 0.94  | 0.24  | 0         |
| CXCL5      | 0     | 1.06792631 | 0.367 | 0.071 | 0         |
| AQP3       | 0     | 1.01370996 | 0.78  | 0.145 | 0         |
| PDLIM1     | 0     | 1.01100484 | 0.818 | 0.204 | 0         |
| RETN       | 0     | 1.00986557 | 0.781 | 0.317 | 0         |
| GLDN       | 0     | 1.00728463 | 0.728 | 0.089 | 0         |
| PLA2G16    | 0     | 0.98767318 | 0.899 | 0.198 | 0         |
| CTSC       | 0     | 0.97757628 | 1     | 0.904 | 0         |
| LGALS3BP   | 0     | 0.96377219 | 0.839 | 0.222 | 0         |
| CD52       | 0     | 0.94021492 | 0.993 | 0.837 | 0         |
| ABCG1      | 0     | 0.9186153  | 0.924 | 0.383 | 0         |
| ALOX5      | 0     | 0.91681155 | 0.982 | 0.574 | 0         |
| VSIG4      | 0     | 0.89594396 | 0.993 | 0.745 | 0         |
| MRC1       | 0     | 0.89221176 | 0.997 | 0.802 | 0         |
| CRIP1      | 0     | 0.88556864 | 0.908 | 0.553 | 0         |
| TREM1      | 0     | 0.8748111  | 0.973 | 0.452 | 0         |
| SCD        | 0     | 0.86322269 | 0.776 | 0.361 | 0         |
| PPARG      | 0     | 0.85659956 | 0.979 | 0.504 | 0         |
| AKR1C3     | 0     | 0.85489539 | 0.645 | 0.152 | 0         |
| LPL        | 0     | 0.84138752 | 0.931 | 0.446 | 0         |
| LY6E       | 0     | 0.83052427 | 0.962 | 0.575 | 0         |
| MARCO      | 0     | 0.82965571 | 0.993 | 0.727 | 0         |
| MME        | 0     | 0.81368091 | 0.649 | 0.089 | 0         |
| SVIL       | 0     | 0.8109602  | 0.861 | 0.184 | 0         |
| EVL        | 0     | 0.79929563 | 0.906 | 0.418 | 0         |
| 11-Sep     | 0     | 0.79744351 | 0.938 | 0.403 | 0         |
| C1QC       | 0     | 0.77368372 | 0.99  | 0.633 | 0         |
| OLR1       | 0     | 0.76865895 | 0.994 | 0.599 | 0         |

|          |   |            |       |       |   |
|----------|---|------------|-------|-------|---|
| GYPC     | 0 | 0.76187218 | 0.93  | 0.441 | 0 |
| DECR1    | 0 | 0.76048957 | 0.945 | 0.559 | 0 |
| GCHFR    | 0 | 0.76039006 | 0.983 | 0.649 | 0 |
| RND3     | 0 | 0.74084351 | 0.389 | 0.079 | 0 |
| LDHB     | 0 | 0.73159901 | 0.911 | 0.607 | 0 |
| PNPLA6   | 0 | 0.7312019  | 0.897 | 0.429 | 0 |
| MSR1     | 0 | 0.7302     | 0.986 | 0.756 | 0 |
| MGST3    | 0 | 0.72619428 | 1     | 0.919 | 0 |
| SPN      | 0 | 0.72361841 | 0.88  | 0.362 | 0 |
| PHLDA3   | 0 | 0.71067561 | 0.855 | 0.225 | 0 |
| STMN1    | 0 | 0.7016539  | 0.785 | 0.292 | 0 |
| TXNIP    | 0 | 0.6823849  | 0.994 | 0.89  | 0 |
| COLEC12  | 0 | 0.67738738 | 0.76  | 0.24  | 0 |
| FHL1     | 0 | 0.67732786 | 0.615 | 0.051 | 0 |
| UBB      | 0 | 0.66834617 | 1     | 0.989 | 0 |
| TCF7L2   | 0 | 0.66384598 | 0.856 | 0.266 | 0 |
| ABHD5    | 0 | 0.66289465 | 0.96  | 0.605 | 0 |
| APIP     | 0 | 0.64866894 | 0.87  | 0.322 | 0 |
| MS4A7    | 0 | 0.63729022 | 1     | 0.908 | 0 |
| BHLHE41  | 0 | 0.6352748  | 0.871 | 0.36  | 0 |
| PLBD1    | 0 | 0.63145114 | 0.959 | 0.635 | 0 |
| PARAL1   | 0 | 0.62155074 | 0.679 | 0.052 | 0 |
| PPIC     | 0 | 0.61236013 | 0.663 | 0.114 | 0 |
| S100A13  | 0 | 0.61233484 | 0.634 | 0.174 | 0 |
| CPE      | 0 | 0.60536226 | 0.507 | 0.02  | 0 |
| JPT1     | 0 | 0.60247604 | 0.952 | 0.662 | 0 |
| LTA4H    | 0 | 0.60201645 | 0.99  | 0.786 | 0 |
| GLRX     | 0 | 0.59904396 | 0.991 | 0.875 | 0 |
| SNX2     | 0 | 0.59849358 | 0.971 | 0.789 | 0 |
| ADAMTSL4 | 0 | 0.59663276 | 0.857 | 0.326 | 0 |
| PTMS     | 0 | 0.5887887  | 0.929 | 0.558 | 0 |
| MLPH     | 0 | 0.57979322 | 0.631 | 0.11  | 0 |
| C9orf16  | 0 | 0.57883263 | 0.956 | 0.761 | 0 |
| GLIPR2   | 0 | 0.57866342 | 0.981 | 0.764 | 0 |
| HP       | 0 | 0.57462747 | 0.288 | 0.024 | 0 |
| CXCL16   | 0 | 0.57332799 | 0.993 | 0.828 | 0 |
| PYCARD   | 0 | 0.57324984 | 0.986 | 0.801 | 0 |
| EML4     | 0 | 0.56772013 | 0.937 | 0.571 | 0 |
| FFAR4    | 0 | 0.56549395 | 0.609 | 0.051 | 0 |
| PTPMT1   | 0 | 0.56362561 | 0.846 | 0.384 | 0 |
| HLA-DRB1 | 0 | 0.56202433 | 1     | 0.981 | 0 |
| CD81     | 0 | 0.56158681 | 1     | 0.939 | 0 |
| AMIGO2   | 0 | 0.56156676 | 0.683 | 0.146 | 0 |
| ACOT7    | 0 | 0.55278071 | 0.643 | 0.19  | 0 |
| TRPV2    | 0 | 0.54984581 | 0.868 | 0.45  | 0 |

|          |   |            |       |       |   |
|----------|---|------------|-------|-------|---|
| CCL23    | 0 | 0.54974317 | 0.505 | 0.125 | 0 |
| HPGD     | 0 | 0.54895557 | 0.832 | 0.32  | 0 |
| GRN      | 0 | 0.54617416 | 1     | 0.988 | 0 |
| SPOCD1   | 0 | 0.54332681 | 0.563 | 0.128 | 0 |
| DEFB1    | 0 | 0.53648791 | 0.418 | 0.074 | 0 |
| IFIT3    | 0 | 0.52989669 | 0.677 | 0.217 | 0 |
| ATP1B1   | 0 | 0.52789027 | 0.807 | 0.377 | 0 |
| PEBP1    | 0 | 0.52782374 | 0.993 | 0.81  | 0 |
| ETHE1    | 0 | 0.52237205 | 0.79  | 0.351 | 0 |
| DOK2     | 0 | 0.5120346  | 0.942 | 0.557 | 0 |
| ACO1     | 0 | 0.51110176 | 0.625 | 0.174 | 0 |
| OASL     | 0 | 0.50774299 | 0.534 | 0.109 | 0 |
| SLC27A3  | 0 | 0.50763529 | 0.752 | 0.277 | 0 |
| TMSB4X   | 0 | 0.49629749 | 1     | 1     | 0 |
| HLA-DRA  | 0 | 0.47735453 | 1     | 0.997 | 0 |
| TSPO     | 0 | 0.4753784  | 1     | 0.988 | 0 |
| LRPAP1   | 0 | 0.46982472 | 0.984 | 0.849 | 0 |
| AXL      | 0 | 0.46942741 | 0.576 | 0.146 | 0 |
| TMEM173  | 0 | 0.46886566 | 0.652 | 0.227 | 0 |
| GAA      | 0 | 0.46447246 | 0.93  | 0.614 | 0 |
| CAT      | 0 | 0.46323145 | 0.932 | 0.596 | 0 |
| ALAS1    | 0 | 0.46140769 | 0.632 | 0.241 | 0 |
| PDCL     | 0 | 0.45680471 | 0.597 | 0.213 | 0 |
| C1orf162 | 0 | 0.4514274  | 0.995 | 0.822 | 0 |
| IFIT2    | 0 | 0.4468379  | 0.492 | 0.13  | 0 |
| STAC     | 0 | 0.44682668 | 0.605 | 0.118 | 0 |
| EDEM2    | 0 | 0.44637521 | 0.763 | 0.356 | 0 |
| DST      | 0 | 0.43586609 | 0.756 | 0.324 | 0 |
| HDDC2    | 0 | 0.43307141 | 0.786 | 0.363 | 0 |
| HCAR2    | 0 | 0.42973171 | 0.482 | 0.079 | 0 |
| SMCO4    | 0 | 0.42738148 | 0.859 | 0.492 | 0 |
| TBC1D10C | 0 | 0.42694631 | 0.559 | 0.118 | 0 |
| CD74     | 0 | 0.41873629 | 1     | 0.994 | 0 |
| CARD16   | 0 | 0.41655354 | 0.874 | 0.457 | 0 |
| RHBDD2   | 0 | 0.41416944 | 0.628 | 0.193 | 0 |
| SPATS2L  | 0 | 0.41305405 | 0.777 | 0.372 | 0 |
| ALDH1A1  | 0 | 0.41241122 | 0.848 | 0.386 | 0 |
| GGA2     | 0 | 0.40943058 | 0.749 | 0.342 | 0 |
| ATP10A   | 0 | 0.40838161 | 0.471 | 0.048 | 0 |
| ENPP4    | 0 | 0.40480863 | 0.661 | 0.237 | 0 |
| ADTRP    | 0 | 0.39366541 | 0.564 | 0.154 | 0 |
| MACC1    | 0 | 0.39100832 | 0.466 | 0.095 | 0 |
| FRMD4A   | 0 | 0.38870285 | 0.669 | 0.234 | 0 |
| S100A11  | 0 | 0.38644707 | 1     | 1     | 0 |
| APOL4    | 0 | 0.38280044 | 0.489 | 0.078 | 0 |

|            |           |            |       |       |           |
|------------|-----------|------------|-------|-------|-----------|
| SLC19A3    | 0         | 0.38181052 | 0.353 | 0.004 | 0         |
| LSAMP      | 0         | 0.37236691 | 0.37  | 0.013 | 0         |
| ACVRL1     | 0         | 0.36904668 | 0.554 | 0.15  | 0         |
| ARHGEF28   | 0         | 0.35777531 | 0.419 | 0.024 | 0         |
| CTSW       | 0         | 0.35307272 | 0.375 | 0.039 | 0         |
| ITGB8      | 0         | 0.33751237 | 0.388 | 0.08  | 0         |
| MYO6       | 0         | 0.30648134 | 0.399 | 0.053 | 0         |
| BACE1      | 0         | 0.30323239 | 0.449 | 0.105 | 0         |
| GALNT12    | 0         | 0.29270718 | 0.373 | 0.06  | 0         |
| DNAAF4     | 0         | 0.29004341 | 0.41  | 0.075 | 0         |
| CEACAM21   | 0         | 0.26114059 | 0.364 | 0.06  | 0         |
| TRHDE      | 0         | 0.25993947 | 0.268 | 0.006 | 0         |
| PCBP1      | 0         | -0.5295    | 0.874 | 0.963 | 0         |
| HM13       | 0         | -0.6214884 | 0.448 | 0.799 | 0         |
| TNFRSF1B   | 0         | -0.7941834 | 0.14  | 0.582 | 0         |
| SAT1       | 0         | -0.8225522 | 1     | 0.999 | 0         |
| FNIP2      | 0         | -0.8854069 | 0.212 | 0.676 | 0         |
| HIF1A      | 0         | -0.9463144 | 0.205 | 0.741 | 0         |
| BASP1      | 0         | -0.9648035 | 0.184 | 0.707 | 0         |
| CD48       | 0         | -1.0627771 | 0.054 | 0.652 | 0         |
| SOCS3      | 0         | -1.0871788 | 0.189 | 0.664 | 0         |
| IER3       | 0         | -1.0930559 | 0.079 | 0.559 | 0         |
| CEBPD      | 0         | -1.1281712 | 0.346 | 0.765 | 0         |
| ZFP36L1    | 0         | -1.139319  | 0.235 | 0.747 | 0         |
| GPR183     | 0         | -1.1482287 | 0.063 | 0.597 | 0         |
| MARCKS     | 0         | -1.3508042 | 0.079 | 0.696 | 0         |
| SOD2       | 0         | -1.381458  | 0.354 | 0.851 | 0         |
| ECH1       | 2.92E-307 | 0.43730683 | 0.901 | 0.588 | 7.22E-303 |
| BSG        | 1.42E-305 | 0.52990554 | 0.945 | 0.774 | 3.52E-301 |
| USP30-AS1  | 8.90E-305 | 0.25634439 | 0.354 | 0.067 | 2.20E-300 |
| ANOS1      | 7.63E-304 | 0.25010737 | 0.366 | 0.071 | 1.89E-299 |
| B3GNT7     | 8.20E-303 | 0.28260297 | 0.448 | 0.115 | 2.03E-298 |
| UBASH3B    | 5.84E-302 | 0.40520227 | 0.7   | 0.304 | 1.45E-297 |
| S1PR4      | 9.20E-300 | 0.38703053 | 0.658 | 0.264 | 2.28E-295 |
| RMDN3      | 1.18E-299 | 0.45713665 | 0.795 | 0.382 | 2.91E-295 |
| VMO1       | 3.64E-299 | 0.45786556 | 0.542 | 0.174 | 9.00E-295 |
| PLXNC1     | 1.98E-297 | -0.546816  | 0.017 | 0.446 | 4.91E-293 |
| RGS2       | 2.28E-297 | -1.1027877 | 0.287 | 0.691 | 5.65E-293 |
| AL035446.1 | 2.38E-289 | 0.30031437 | 0.527 | 0.167 | 5.88E-285 |
| SPI1       | 5.20E-289 | 0.38988148 | 0.992 | 0.896 | 1.29E-284 |
| TIMP1      | 2.53E-288 | -1.4246931 | 0.684 | 0.857 | 6.26E-284 |
| PTPRE      | 1.93E-284 | -0.7249205 | 0.235 | 0.631 | 4.78E-280 |
| IL3RA      | 2.44E-284 | 0.45263262 | 0.776 | 0.348 | 6.03E-280 |
| CCL18      | 1.96E-283 | 0.82797603 | 0.929 | 0.683 | 4.84E-279 |
| PECAM1     | 1.10E-282 | 0.45095622 | 0.896 | 0.56  | 2.72E-278 |

|            |           |            |       |       |           |
|------------|-----------|------------|-------|-------|-----------|
| SLCO2B1    | 1.85E-282 | 0.40553193 | 0.905 | 0.492 | 4.57E-278 |
| CITED2     | 4.86E-282 | 0.50227756 | 0.845 | 0.496 | 1.20E-277 |
| ITM2B      | 5.25E-282 | 0.33847565 | 1     | 0.985 | 1.30E-277 |
| NCEH1      | 5.54E-282 | 0.4324576  | 0.946 | 0.592 | 1.37E-277 |
| DNASE2     | 1.28E-277 | 0.43098468 | 0.853 | 0.481 | 3.17E-273 |
| BLVRB      | 4.19E-277 | -0.6626238 | 0.672 | 0.887 | 1.04E-272 |
| FAM198B    | 1.79E-272 | -0.4663545 | 0.023 | 0.428 | 4.43E-268 |
| LILRB4     | 1.85E-272 | -0.7090372 | 0.235 | 0.625 | 4.58E-268 |
| SNX10      | 6.47E-272 | 0.4309436  | 0.982 | 0.791 | 1.60E-267 |
| NMB        | 2.19E-271 | 0.51632007 | 0.511 | 0.171 | 5.42E-267 |
| TANC2      | 3.47E-270 | 0.33115663 | 0.58  | 0.213 | 8.59E-266 |
| HLA-DQB1   | 3.25E-268 | 0.39796903 | 0.998 | 0.897 | 8.04E-264 |
| SCCPDH     | 2.44E-267 | 0.41855967 | 0.811 | 0.445 | 6.04E-263 |
| MINK1      | 1.35E-266 | 0.27444793 | 0.442 | 0.128 | 3.35E-262 |
| SAMD9L     | 3.06E-265 | 0.36680923 | 0.631 | 0.259 | 7.57E-261 |
| CES1       | 1.70E-264 | 0.86230423 | 0.539 | 0.202 | 4.20E-260 |
| PLEKHO1    | 5.02E-264 | -0.6923774 | 0.153 | 0.551 | 1.24E-259 |
| MDH1       | 2.48E-263 | 0.39719172 | 0.967 | 0.755 | 6.15E-259 |
| AKR1B1     | 8.44E-263 | 0.50451943 | 0.79  | 0.435 | 2.09E-258 |
| NAMPT      | 1.30E-260 | -1.3536641 | 0.765 | 0.886 | 3.23E-256 |
| CLDN7      | 1.55E-260 | 0.27797197 | 0.397 | 0.103 | 3.84E-256 |
| TGM2       | 1.83E-260 | 0.70207164 | 0.663 | 0.317 | 4.52E-256 |
| CD300LF    | 2.50E-260 | 0.36664275 | 0.753 | 0.375 | 6.18E-256 |
| CORO1A     | 1.11E-259 | -0.7637107 | 0.101 | 0.494 | 2.75E-255 |
| KLF6       | 2.10E-259 | -0.717717  | 0.78  | 0.933 | 5.20E-255 |
| CD14       | 8.42E-259 | -1.0043414 | 0.674 | 0.862 | 2.09E-254 |
| APOC1      | 5.38E-258 | 0.48081658 | 1     | 0.823 | 1.33E-253 |
| MYL6       | 1.62E-257 | 0.36397188 | 1     | 0.999 | 4.01E-253 |
| CORO2A     | 1.39E-256 | 0.28240455 | 0.473 | 0.149 | 3.43E-252 |
| DOCK8      | 1.08E-254 | 0.37663904 | 0.864 | 0.52  | 2.68E-250 |
| NR4A2      | 2.08E-254 | -0.799407  | 0.384 | 0.731 | 5.15E-250 |
| C2         | 3.16E-253 | 0.43952045 | 0.675 | 0.297 | 7.82E-249 |
| POR        | 7.49E-253 | 0.36360559 | 0.842 | 0.482 | 1.85E-248 |
| HADH       | 3.94E-252 | 0.27743616 | 0.49  | 0.166 | 9.76E-248 |
| IFITM2     | 8.65E-252 | -1.1339614 | 0.045 | 0.429 | 2.14E-247 |
| PRKCB      | 4.79E-251 | -0.5093349 | 0.057 | 0.445 | 1.19E-246 |
| AL390036.1 | 6.30E-251 | 0.25786045 | 0.433 | 0.126 | 1.56E-246 |
| HLA-DPA1   | 3.21E-250 | 0.28764981 | 1     | 0.97  | 7.95E-246 |
| SLC2A3     | 3.59E-250 | -1.1219478 | 0.408 | 0.727 | 8.89E-246 |
| ZNF331     | 5.30E-248 | -0.8254739 | 0.384 | 0.729 | 1.31E-243 |
| FOSB       | 1.38E-247 | -0.7640812 | 0.368 | 0.718 | 3.41E-243 |
| LIMA1      | 7.87E-247 | 0.30932648 | 0.471 | 0.156 | 1.95E-242 |
| NINJ1      | 2.76E-246 | -0.5383968 | 0.087 | 0.476 | 6.82E-242 |
| UBC        | 9.70E-244 | -0.4409277 | 0.998 | 0.999 | 2.40E-239 |
| PLA2G7     | 1.02E-242 | -0.9053363 | 0.241 | 0.602 | 2.53E-238 |

|           |           |            |       |       |           |
|-----------|-----------|------------|-------|-------|-----------|
| SLC35E3   | 2.77E-239 | 0.40102236 | 0.658 | 0.311 | 6.86E-235 |
| TST       | 6.31E-239 | 0.26300647 | 0.419 | 0.127 | 1.56E-234 |
| LYAR      | 2.83E-236 | 0.36168267 | 0.726 | 0.369 | 7.01E-232 |
| HMOX2     | 7.31E-236 | 0.31063463 | 0.647 | 0.303 | 1.81E-231 |
| ATP13A3   | 8.54E-236 | -0.6238213 | 0.304 | 0.638 | 2.11E-231 |
| CD84      | 8.84E-236 | -0.7072544 | 0.303 | 0.623 | 2.19E-231 |
| CDC42BPB  | 2.52E-234 | 0.30880793 | 0.561 | 0.231 | 6.24E-230 |
| KAT8      | 2.82E-234 | 0.33110874 | 0.6   | 0.265 | 6.98E-230 |
| PHYH      | 2.84E-234 | 0.31028616 | 0.655 | 0.301 | 7.03E-230 |
| FDFT1     | 4.71E-234 | 0.33736675 | 0.511 | 0.187 | 1.16E-229 |
| ABCG2     | 1.05E-232 | 0.27703735 | 0.427 | 0.128 | 2.60E-228 |
| HLA-DQA1  | 2.57E-232 | 0.50615515 | 0.985 | 0.774 | 6.37E-228 |
| SPP1      | 7.56E-232 | -3.0483257 | 0.217 | 0.557 | 1.87E-227 |
| MOB3B     | 4.17E-230 | 0.30425912 | 0.62  | 0.27  | 1.03E-225 |
| FYB1      | 2.44E-229 | -0.6676114 | 0.521 | 0.753 | 6.04E-225 |
| PKP2      | 2.70E-229 | 0.29664453 | 0.312 | 0.069 | 6.68E-225 |
| FGL2      | 5.20E-229 | -1.0040404 | 0.105 | 0.462 | 1.29E-224 |
| MTPN      | 2.12E-228 | 0.32059232 | 0.978 | 0.874 | 5.26E-224 |
| EMP1      | 3.15E-228 | -0.778952  | 0.173 | 0.543 | 7.80E-224 |
| MIR3945HG | 8.33E-226 | 0.42140473 | 0.581 | 0.241 | 2.06E-221 |
| JAML      | 2.45E-225 | 0.40337112 | 0.809 | 0.443 | 6.07E-221 |
| QSOX1     | 8.41E-224 | 0.36990992 | 0.726 | 0.389 | 2.08E-219 |
| ZFP36     | 1.64E-222 | -0.7593416 | 0.449 | 0.713 | 4.07E-218 |
| H3F3B     | 6.99E-222 | -0.5703209 | 1     | 0.999 | 1.73E-217 |
| GPATCH11  | 2.45E-221 | 0.29423817 | 0.519 | 0.205 | 6.06E-217 |
| MCOLN1    | 2.74E-221 | 0.37592995 | 0.855 | 0.548 | 6.77E-217 |
| LIMS1     | 5.95E-221 | -0.561661  | 0.808 | 0.915 | 1.47E-216 |
| AP1S2     | 6.32E-221 | -0.5719952 | 0.373 | 0.679 | 1.56E-216 |
| TTYH3     | 1.18E-220 | -0.4797109 | 0.153 | 0.513 | 2.93E-216 |
| MT-CYB    | 1.20E-220 | 0.33308064 | 1     | 1     | 2.97E-216 |
| SGMS2     | 5.98E-220 | 0.35370611 | 0.628 | 0.286 | 1.48E-215 |
| ACYP2     | 6.58E-220 | 0.27665015 | 0.476 | 0.172 | 1.63E-215 |
| PIM3      | 2.25E-219 | -0.5509625 | 0.304 | 0.638 | 5.58E-215 |
| NUCB1     | 6.95E-218 | 0.3586516  | 0.928 | 0.691 | 1.72E-213 |
| HSD17B11  | 7.34E-218 | 0.34727845 | 0.785 | 0.448 | 1.82E-213 |
| BCAT1     | 2.60E-217 | -0.5339647 | 0.284 | 0.619 | 6.44E-213 |
| GMFG      | 2.69E-217 | 0.28979874 | 0.994 | 0.908 | 6.66E-213 |
| IL7R      | 2.67E-216 | 0.40016383 | 0.647 | 0.287 | 6.60E-212 |
| ACER3     | 1.76E-215 | 0.33376239 | 0.825 | 0.497 | 4.36E-211 |
| RPS9      | 4.08E-215 | -0.3879101 | 0.999 | 1     | 1.01E-210 |
| DAZAP2    | 1.92E-214 | -0.5327238 | 0.525 | 0.759 | 4.75E-210 |
| OSCAR     | 6.55E-214 | 0.39128567 | 0.817 | 0.506 | 1.62E-209 |
| DMAC1     | 8.54E-214 | 0.32178324 | 0.664 | 0.34  | 2.11E-209 |
| SCP2      | 8.84E-214 | 0.31211434 | 0.958 | 0.766 | 2.19E-209 |
| TMEM123   | 1.08E-213 | -0.4514212 | 0.415 | 0.714 | 2.68E-209 |

|         |           |            |       |       |           |
|---------|-----------|------------|-------|-------|-----------|
| CARS2   | 3.59E-213 | 0.29181637 | 0.653 | 0.314 | 8.89E-209 |
| RASSF2  | 6.07E-213 | -0.4126748 | 0.015 | 0.351 | 1.50E-208 |
| SMIM3   | 2.17E-212 | -0.4774693 | 0.096 | 0.453 | 5.37E-208 |
| COMT    | 3.59E-211 | 0.35077479 | 0.968 | 0.854 | 8.88E-207 |
| FCGR3A  | 1.14E-210 | 0.36237899 | 0.937 | 0.649 | 2.81E-206 |
| SELENON | 1.54E-210 | 0.30808963 | 0.503 | 0.201 | 3.80E-206 |
| RNF130  | 2.09E-210 | -0.4137719 | 0.856 | 0.928 | 5.18E-206 |
| CD93    | 7.96E-210 | -0.7510423 | 0.019 | 0.35  | 1.97E-205 |
| RETREG1 | 4.03E-209 | 0.30509431 | 0.499 | 0.182 | 9.97E-205 |
| BEX4    | 1.30E-207 | 0.36607816 | 0.664 | 0.341 | 3.21E-203 |
| TLR2    | 1.82E-207 | -0.5856418 | 0.147 | 0.486 | 4.51E-203 |
| CFLAR   | 4.11E-206 | -0.5703757 | 0.451 | 0.733 | 1.02E-201 |
| CDCP1   | 1.28E-205 | 0.27748069 | 0.543 | 0.223 | 3.16E-201 |
| PPP1CB  | 7.04E-205 | -0.4842104 | 0.572 | 0.791 | 1.74E-200 |
| HPGDS   | 1.28E-204 | 0.27891333 | 0.348 | 0.095 | 3.17E-200 |
| HLA-DMA | 2.38E-204 | 0.33139981 | 0.999 | 0.895 | 5.90E-200 |
| RGS1    | 4.55E-204 | -1.0490868 | 0.21  | 0.542 | 1.13E-199 |
| BLVRA   | 5.19E-203 | 0.32777787 | 0.878 | 0.59  | 1.29E-198 |
| ABCA1   | 7.40E-203 | -0.5830707 | 0.182 | 0.534 | 1.83E-198 |
| HSPB1   | 3.65E-202 | 0.38639668 | 0.899 | 0.651 | 9.04E-198 |
| PRSS21  | 8.24E-202 | 0.4356644  | 0.316 | 0.083 | 2.04E-197 |
| MT-CO3  | 1.04E-201 | 0.27638194 | 1     | 1     | 2.57E-197 |
| DDIT4   | 2.44E-201 | -0.7641806 | 0.169 | 0.504 | 6.05E-197 |
| A2M     | 1.45E-200 | -0.7183341 | 0.162 | 0.493 | 3.59E-196 |
| FCN1    | 1.60E-200 | -1.2489013 | 0.096 | 0.429 | 3.95E-196 |
| STOM    | 2.93E-199 | 0.44887301 | 0.793 | 0.532 | 7.26E-195 |
| SORT1   | 3.23E-199 | 0.31727317 | 0.824 | 0.498 | 7.99E-195 |
| SIRPB1  | 2.29E-198 | 0.28114058 | 0.522 | 0.21  | 5.66E-194 |
| ATF3    | 2.29E-197 | -0.6361283 | 0.389 | 0.704 | 5.67E-193 |
| MERTK   | 4.53E-196 | -0.4044134 | 0.017 | 0.333 | 1.12E-191 |
| RGL1    | 7.37E-195 | -0.4331358 | 0.036 | 0.357 | 1.83E-190 |
| ESYT1   | 1.57E-193 | 0.2869663  | 0.617 | 0.301 | 3.90E-189 |
| ROGDI   | 3.15E-193 | 0.25078032 | 0.457 | 0.168 | 7.80E-189 |
| TRIM14  | 5.08E-192 | 0.29174479 | 0.64  | 0.32  | 1.26E-187 |
| METRNL  | 2.38E-191 | -0.5108154 | 0.511 | 0.759 | 5.90E-187 |
| GSTO1   | 2.93E-190 | 0.28004462 | 1     | 0.985 | 7.25E-186 |
| FABP3   | 4.29E-190 | 0.87831421 | 0.49  | 0.222 | 1.06E-185 |
| VAMP8   | 4.81E-189 | 0.25342141 | 0.999 | 0.976 | 1.19E-184 |
| EEF1D   | 5.25E-189 | -0.4192629 | 0.976 | 0.987 | 1.30E-184 |
| ICAM1   | 1.79E-187 | -0.5463646 | 0.086 | 0.412 | 4.44E-183 |
| ACP5    | 4.34E-187 | 0.35024872 | 0.999 | 0.843 | 1.07E-182 |
| ETS2    | 4.74E-186 | -0.7119022 | 0.446 | 0.686 | 1.17E-181 |
| PNRC1   | 5.66E-186 | -0.7200189 | 0.6   | 0.799 | 1.40E-181 |
| REL     | 1.17E-184 | -0.6302915 | 0.617 | 0.802 | 2.89E-180 |
| SLFN11  | 1.44E-184 | 0.29254565 | 0.664 | 0.347 | 3.55E-180 |

|          |           |            |       |       |           |
|----------|-----------|------------|-------|-------|-----------|
| PPDPF    | 1.69E-184 | 0.33658041 | 0.982 | 0.858 | 4.18E-180 |
| CIB1     | 3.09E-184 | 0.28667989 | 0.966 | 0.837 | 7.65E-180 |
| PARP4    | 5.70E-184 | 0.28768242 | 0.658 | 0.345 | 1.41E-179 |
| HNMT     | 1.38E-183 | 0.3046437  | 0.936 | 0.724 | 3.43E-179 |
| SAMM50   | 2.83E-183 | 0.25106551 | 0.498 | 0.211 | 7.00E-179 |
| DDX3X    | 1.47E-182 | -0.5316309 | 0.682 | 0.86  | 3.64E-178 |
| VEGFA    | 1.60E-182 | -0.6696978 | 0.045 | 0.352 | 3.96E-178 |
| SGK1     | 6.98E-181 | -0.6309078 | 0.625 | 0.819 | 1.73E-176 |
| UBE2L6   | 3.27E-180 | 0.33143835 | 0.779 | 0.482 | 8.10E-176 |
| TFPT     | 1.26E-179 | 0.28713057 | 0.719 | 0.407 | 3.13E-175 |
| STAB1    | 3.79E-179 | -0.6249271 | 0.009 | 0.301 | 9.39E-175 |
| GSN      | 4.12E-179 | 0.45081235 | 0.939 | 0.782 | 1.02E-174 |
| RNF149   | 5.80E-178 | 0.27874189 | 0.937 | 0.704 | 1.44E-173 |
| HNRNPA3  | 1.23E-177 | -0.4819485 | 0.71  | 0.848 | 3.04E-173 |
| CREM     | 1.52E-177 | -0.6503668 | 0.272 | 0.571 | 3.77E-173 |
| ADGRE2   | 7.08E-177 | -0.5057657 | 0.134 | 0.446 | 1.75E-172 |
| FOS      | 1.35E-175 | -0.8245178 | 0.9   | 0.952 | 3.34E-171 |
| PFKFB3   | 4.42E-175 | -0.4889569 | 0.06  | 0.362 | 1.10E-170 |
| HERPUD1  | 7.85E-175 | -0.7220954 | 0.585 | 0.795 | 1.94E-170 |
| IER2     | 3.62E-174 | -0.6639021 | 0.308 | 0.596 | 8.97E-170 |
| TNFSF12  | 1.04E-173 | 0.27593051 | 0.73  | 0.413 | 2.58E-169 |
| LY86     | 2.27E-173 | 0.34705627 | 0.806 | 0.514 | 5.61E-169 |
| LILRB2   | 2.67E-173 | -0.5503202 | 0.172 | 0.474 | 6.61E-169 |
| RAP2B    | 2.82E-173 | -0.460626  | 0.371 | 0.64  | 6.98E-169 |
| RALA     | 4.27E-173 | -0.5623174 | 0.392 | 0.639 | 1.06E-168 |
| DOCK11   | 4.33E-173 | 0.27931006 | 0.718 | 0.408 | 1.07E-168 |
| IRF2BP2  | 2.71E-172 | -0.4197305 | 0.341 | 0.634 | 6.70E-168 |
| PSME4    | 3.69E-170 | 0.3221657  | 0.555 | 0.271 | 9.13E-166 |
| NOP10    | 4.97E-170 | 0.32861696 | 0.997 | 0.953 | 1.23E-165 |
| PABPC4   | 4.51E-169 | -0.4520398 | 0.55  | 0.764 | 1.12E-164 |
| IFITM3   | 1.84E-168 | -0.7335405 | 0.232 | 0.538 | 4.57E-164 |
| JUNB     | 3.63E-168 | -0.6711856 | 0.902 | 0.955 | 8.99E-164 |
| ATP1A1   | 1.33E-167 | -0.4548892 | 0.551 | 0.764 | 3.28E-163 |
| MTSS1    | 3.29E-167 | -0.3708186 | 0.011 | 0.289 | 8.16E-163 |
| HRH2     | 9.39E-167 | -0.3654811 | 0.012 | 0.29  | 2.33E-162 |
| RPS6     | 5.50E-166 | -0.3326846 | 0.999 | 0.999 | 1.36E-161 |
| SH3KBP1  | 5.60E-166 | -0.3872553 | 0.106 | 0.408 | 1.39E-161 |
| SPNS1    | 8.02E-166 | 0.29082952 | 0.73  | 0.441 | 1.99E-161 |
| CYB5R3   | 2.81E-165 | 0.28895283 | 0.776 | 0.494 | 6.96E-161 |
| MACF1    | 3.45E-165 | -0.41955   | 0.232 | 0.534 | 8.54E-161 |
| HNRNPU   | 6.29E-165 | -0.5893042 | 0.859 | 0.933 | 1.56E-160 |
| PILRA    | 5.05E-164 | 0.297997   | 0.822 | 0.518 | 1.25E-159 |
| SLC25A37 | 1.82E-163 | -0.7731533 | 0.115 | 0.409 | 4.50E-159 |
| FLVCR2   | 5.28E-163 | 0.25720068 | 0.56  | 0.269 | 1.31E-158 |
| GAPDH    | 1.99E-162 | -0.460265  | 0.999 | 0.999 | 4.93E-158 |



|          |           |            |       |       |           |
|----------|-----------|------------|-------|-------|-----------|
| CXCL8    | 2.04E-162 | -1.5247862 | 0.058 | 0.348 | 5.05E-158 |
| YWHAH    | 3.03E-162 | 0.26666528 | 0.889 | 0.655 | 7.49E-158 |
| ARL4A    | 5.02E-162 | 0.34048487 | 0.846 | 0.591 | 1.24E-157 |
| CSTA     | 2.08E-161 | 0.28897977 | 0.903 | 0.622 | 5.15E-157 |
| DUSP2    | 2.91E-161 | -0.7260859 | 0.101 | 0.392 | 7.21E-157 |
| ATP5MC3  | 5.42E-161 | 0.25928732 | 0.996 | 0.961 | 1.34E-156 |
| ARL4C    | 6.65E-161 | -0.5479379 | 0.057 | 0.343 | 1.65E-156 |
| CCL2     | 8.04E-160 | -1.9454725 | 0.025 | 0.298 | 1.99E-155 |
| FOSL2    | 1.53E-159 | -0.5415534 | 0.289 | 0.566 | 3.79E-155 |
| SRGN     | 4.72E-159 | -0.8598036 | 0.997 | 0.99  | 1.17E-154 |
| TGOLN2   | 1.38E-158 | 0.27057649 | 0.964 | 0.851 | 3.42E-154 |
| ARHGAP45 | 3.67E-158 | -0.3033411 | 0.046 | 0.327 | 9.10E-154 |
| IL6R     | 7.03E-158 | -0.3483305 | 0.062 | 0.346 | 1.74E-153 |
| LIMD2    | 1.20E-156 | -0.3580741 | 0.026 | 0.297 | 2.97E-152 |
| REEP5    | 1.36E-156 | 0.26261471 | 0.989 | 0.924 | 3.37E-152 |
| HMGA1    | 1.88E-156 | -0.4922625 | 0.271 | 0.549 | 4.65E-152 |
| SERPINB9 | 3.53E-156 | -0.4980141 | 0.028 | 0.297 | 8.74E-152 |
| SIDT2    | 3.54E-156 | 0.26641623 | 0.717 | 0.413 | 8.75E-152 |
| OPN3     | 2.82E-155 | 0.26704077 | 0.694 | 0.396 | 6.97E-151 |
| CYB5A    | 4.09E-155 | 0.29280246 | 0.87  | 0.599 | 1.01E-150 |
| TP53I3   | 1.90E-154 | 0.25556687 | 0.52  | 0.247 | 4.69E-150 |
| EEF2     | 2.15E-154 | -0.3643707 | 0.938 | 0.971 | 5.31E-150 |
| PTPN6    | 4.09E-154 | 0.26975492 | 0.938 | 0.736 | 1.01E-149 |
| NBDY     | 1.58E-153 | 0.26148506 | 0.709 | 0.417 | 3.92E-149 |
| ITGB2    | 3.26E-153 | -0.4517007 | 0.921 | 0.96  | 8.06E-149 |
| JAK1     | 5.94E-153 | -0.3985214 | 0.49  | 0.712 | 1.47E-148 |
| S100A10  | 6.78E-153 | 0.31927013 | 1     | 0.991 | 1.68E-148 |
| FAM49B   | 1.19E-152 | -0.3929368 | 0.703 | 0.83  | 2.94E-148 |
| HLA-E    | 1.20E-152 | -0.4198851 | 0.996 | 0.993 | 2.97E-148 |
| MEF2C    | 5.49E-152 | -0.4145917 | 0.063 | 0.339 | 1.36E-147 |
| CLK1     | 6.32E-152 | -0.4135847 | 0.288 | 0.564 | 1.57E-147 |
| LAMTOR1  | 8.66E-152 | 0.27106087 | 0.965 | 0.875 | 2.14E-147 |
| TNFAIP3  | 1.04E-151 | -0.7735626 | 0.16  | 0.444 | 2.58E-147 |
| ZFYVE16  | 1.55E-151 | -0.4885542 | 0.433 | 0.664 | 3.85E-147 |
| GNA13    | 2.04E-151 | -0.4273761 | 0.356 | 0.618 | 5.04E-147 |
| MPC1     | 2.12E-151 | 0.27568479 | 0.82  | 0.556 | 5.26E-147 |
| NEAT1    | 3.46E-151 | -0.6305201 | 0.999 | 0.998 | 8.55E-147 |
| APOL6    | 3.91E-151 | 0.25930905 | 0.696 | 0.397 | 9.67E-147 |
| HMGN2    | 1.93E-150 | 0.28854941 | 0.955 | 0.821 | 4.77E-146 |
| NPC2     | 5.35E-150 | -0.3463789 | 0.998 | 0.995 | 1.33E-145 |
| GAS7     | 9.24E-150 | -0.3617233 | 0.129 | 0.417 | 2.29E-145 |
| CSF3R    | 1.33E-149 | -0.5337074 | 0.096 | 0.376 | 3.30E-145 |
| CYP27A1  | 6.64E-149 | 0.27870006 | 0.988 | 0.667 | 1.64E-144 |
| RPS12    | 1.04E-148 | -0.300925  | 1     | 1     | 2.56E-144 |
| VSIR     | 1.34E-148 | -0.6206022 | 0.181 | 0.448 | 3.31E-144 |

|          |           |            |       |       |           |
|----------|-----------|------------|-------|-------|-----------|
| RPL13    | 2.53E-148 | -0.3006263 | 1     | 1     | 6.26E-144 |
| PBDC1    | 5.62E-148 | 0.26239268 | 0.752 | 0.465 | 1.39E-143 |
| PTMA     | 6.02E-148 | -0.3055756 | 1     | 0.999 | 1.49E-143 |
| KIAA0930 | 1.07E-147 | -0.4774096 | 0.368 | 0.618 | 2.64E-143 |
| ADM      | 1.37E-147 | -0.6107889 | 0.091 | 0.365 | 3.40E-143 |
| TNNI2    | 8.54E-147 | 0.29121283 | 0.466 | 0.213 | 2.12E-142 |
| NAA20    | 1.10E-146 | 0.28643318 | 0.826 | 0.584 | 2.72E-142 |
| FUS      | 2.27E-146 | -0.4379503 | 0.648 | 0.822 | 5.63E-142 |
| SPAG9    | 1.32E-145 | -0.4283786 | 0.32  | 0.581 | 3.27E-141 |
| UBE2D3   | 1.87E-145 | -0.3914769 | 0.901 | 0.945 | 4.62E-141 |
| PRDX1    | 3.74E-145 | 0.28169905 | 0.999 | 0.981 | 9.25E-141 |
| CD151    | 4.17E-145 | 0.31203802 | 0.802 | 0.558 | 1.03E-140 |
| SLC38A2  | 5.85E-145 | -0.4803911 | 0.47  | 0.705 | 1.45E-140 |
| IFI6     | 3.20E-144 | 0.38148561 | 0.868 | 0.62  | 7.93E-140 |
| PSME2    | 7.27E-144 | 0.25284563 | 0.942 | 0.792 | 1.80E-139 |
| CD9      | 9.45E-144 | 0.36695198 | 0.981 | 0.811 | 2.34E-139 |
| RPS26    | 1.98E-143 | -0.416381  | 0.982 | 0.988 | 4.90E-139 |
| RPL31    | 2.26E-143 | -0.3637314 | 0.929 | 0.963 | 5.60E-139 |
| MIDN     | 6.11E-143 | -0.4662921 | 0.316 | 0.57  | 1.51E-138 |
| TYROBP   | 6.90E-143 | 0.2740172  | 1     | 0.999 | 1.71E-138 |
| MGAT1    | 8.39E-142 | -0.3661555 | 0.858 | 0.912 | 2.08E-137 |
| JARID2   | 1.83E-141 | -0.3766841 | 0.141 | 0.414 | 4.53E-137 |
| BTG1     | 5.00E-141 | -0.657136  | 0.866 | 0.922 | 1.24E-136 |
| AGPAT2   | 1.07E-140 | 0.26822518 | 0.83  | 0.571 | 2.66E-136 |
| MIS18BP1 | 1.28E-140 | 0.26868543 | 0.772 | 0.477 | 3.16E-136 |
| RPL7     | 1.54E-140 | -0.32478   | 0.999 | 0.999 | 3.80E-136 |
| NLRP3    | 1.78E-140 | -0.5016313 | 0.049 | 0.305 | 4.40E-136 |
| AVPI1    | 7.36E-140 | 0.29155496 | 0.707 | 0.435 | 1.82E-135 |
| CD300A   | 9.63E-140 | -0.3759815 | 0.145 | 0.418 | 2.38E-135 |
| FMN1     | 4.00E-139 | -0.3250987 | 0.098 | 0.37  | 9.91E-135 |
| EMB      | 5.28E-139 | -0.3530001 | 0.027 | 0.274 | 1.31E-134 |
| CXCL3    | 7.71E-139 | 0.45245111 | 0.625 | 0.345 | 1.91E-134 |
| CCL3     | 8.24E-139 | -0.8746763 | 0.09  | 0.371 | 2.04E-134 |
| SCPEP1   | 1.08E-138 | 0.3207128  | 0.915 | 0.742 | 2.69E-134 |
| LGALS3   | 1.34E-138 | 0.28306224 | 1     | 0.982 | 3.32E-134 |
| NPL      | 3.02E-138 | -0.4616313 | 0.419 | 0.624 | 7.48E-134 |
| RPS7     | 1.96E-134 | -0.2794752 | 1     | 0.999 | 4.84E-130 |
| ATF4     | 1.97E-134 | -0.3860539 | 0.553 | 0.764 | 4.87E-130 |
| SLC31A2  | 3.11E-133 | 0.25053211 | 0.845 | 0.577 | 7.70E-129 |
| DNASE2B  | 3.97E-132 | 0.2743195  | 0.353 | 0.133 | 9.83E-128 |
| CCR1     | 9.05E-132 | -0.4150548 | 0.337 | 0.591 | 2.24E-127 |
| ARRDC4   | 1.47E-131 | 0.28766387 | 0.519 | 0.266 | 3.65E-127 |
| POU2F2   | 1.94E-131 | -0.4316372 | 0.036 | 0.275 | 4.80E-127 |
| MAT2A    | 2.87E-131 | -0.5001772 | 0.438 | 0.648 | 7.11E-127 |
| HOMER3   | 4.54E-131 | -0.2936328 | 0.122 | 0.39  | 1.12E-126 |

|           |           |            |       |       |           |
|-----------|-----------|------------|-------|-------|-----------|
| TYMP      | 5.54E-131 | -0.412893  | 0.978 | 0.983 | 1.37E-126 |
| PRKAG2    | 1.23E-130 | -0.31098   | 0.139 | 0.408 | 3.04E-126 |
| VMP1      | 4.03E-130 | -0.5911611 | 0.571 | 0.74  | 9.99E-126 |
| SFPQ      | 1.02E-129 | -0.4733184 | 0.586 | 0.748 | 2.54E-125 |
| CDKN1A    | 1.38E-129 | -0.4175031 | 0.326 | 0.594 | 3.41E-125 |
| HNRNPH1   | 1.17E-128 | -0.3969323 | 0.554 | 0.74  | 2.90E-124 |
| NAIP      | 3.65E-128 | -0.4107076 | 0.161 | 0.413 | 9.04E-124 |
| ZFP36L2   | 9.68E-128 | -0.5261785 | 0.789 | 0.877 | 2.40E-123 |
| IGFBP7    | 1.45E-127 | -0.2973139 | 0.073 | 0.324 | 3.59E-123 |
| OSBPL8    | 2.00E-127 | -0.4890508 | 0.552 | 0.721 | 4.95E-123 |
| RPL35     | 1.42E-126 | -0.2546053 | 1     | 0.999 | 3.52E-122 |
| CDV3      | 2.28E-126 | -0.3275111 | 0.75  | 0.862 | 5.66E-122 |
| CYTH4     | 3.15E-126 | -0.3282459 | 0.147 | 0.404 | 7.80E-122 |
| CALM3     | 3.70E-126 | -0.5958008 | 0.697 | 0.799 | 9.16E-122 |
| RPS11     | 2.27E-125 | -0.2792713 | 0.999 | 1     | 5.62E-121 |
| MTRNR2L8  | 1.07E-124 | -0.491139  | 0.339 | 0.611 | 2.65E-120 |
| MPEG1     | 1.98E-124 | -0.536551  | 0.177 | 0.415 | 4.91E-120 |
| FUOM      | 7.56E-124 | 0.27740359 | 0.814 | 0.578 | 1.87E-119 |
| MXD1      | 8.74E-124 | -0.5684134 | 0.208 | 0.46  | 2.16E-119 |
| PDK4      | 1.67E-123 | 0.26177355 | 0.654 | 0.373 | 4.13E-119 |
| ANXA6     | 2.63E-123 | -0.2857511 | 0.055 | 0.297 | 6.52E-119 |
| SFTPB     | 3.16E-123 | -0.3247048 | 0.11  | 0.358 | 7.82E-119 |
| TRA2B     | 1.65E-122 | -0.3855231 | 0.405 | 0.629 | 4.10E-118 |
| LSP1      | 1.78E-122 | -0.4453881 | 0.367 | 0.6   | 4.40E-118 |
| WIPF1     | 5.05E-121 | -0.3717299 | 0.449 | 0.655 | 1.25E-116 |
| ADAM9     | 7.50E-121 | -0.3687825 | 0.351 | 0.578 | 1.86E-116 |
| RPL4      | 1.35E-120 | -0.3016152 | 0.992 | 0.991 | 3.35E-116 |
| CD300E    | 1.69E-120 | -0.5572554 | 0.041 | 0.266 | 4.18E-116 |
| ST8SIA4   | 2.21E-120 | -0.2898644 | 0.038 | 0.264 | 5.48E-116 |
| CHCHD10   | 7.70E-120 | 0.27250842 | 0.958 | 0.819 | 1.91E-115 |
| PRKAR1A   | 3.70E-119 | -0.3463334 | 0.513 | 0.711 | 9.17E-115 |
| FAM20C    | 5.71E-119 | -0.3980678 | 0.212 | 0.458 | 1.41E-114 |
| CYP1B1    | 8.13E-118 | -0.5086986 | 0.035 | 0.257 | 2.01E-113 |
| MTRNR2L12 | 3.00E-117 | -0.5780156 | 0.664 | 0.848 | 7.42E-113 |
| TAGLN2    | 7.58E-117 | 0.27063712 | 0.973 | 0.883 | 1.88E-112 |
| CTSB      | 7.62E-117 | -0.5810889 | 0.998 | 0.995 | 1.89E-112 |
| TSPAN3    | 8.74E-117 | 0.30247577 | 0.62  | 0.388 | 2.16E-112 |
| SLC39A8   | 1.32E-116 | -0.4009563 | 0.032 | 0.251 | 3.26E-112 |
| IFIT1     | 1.99E-116 | 0.25534328 | 0.269 | 0.09  | 4.92E-112 |
| RBMS1     | 7.38E-116 | -0.3718376 | 0.546 | 0.709 | 1.83E-111 |
| HNRNPC    | 1.34E-114 | -0.3251012 | 0.808 | 0.881 | 3.31E-110 |
| SNCA      | 2.38E-114 | -0.2633609 | 0.067 | 0.299 | 5.88E-110 |
| SLC43A3   | 3.07E-114 | -0.3656743 | 0.262 | 0.5   | 7.59E-110 |
| RPL35A    | 5.45E-114 | -0.2898305 | 0.999 | 0.998 | 1.35E-109 |
| SOD1      | 3.76E-113 | 0.25431307 | 0.915 | 0.784 | 9.31E-109 |

|         |           |            |       |       |           |
|---------|-----------|------------|-------|-------|-----------|
| FPR3    | 4.92E-113 | -0.493226  | 0.284 | 0.503 | 1.22E-108 |
| EIF4G2  | 9.28E-112 | -0.3361055 | 0.886 | 0.934 | 2.30E-107 |
| FLOT1   | 1.67E-111 | -0.3570391 | 0.314 | 0.558 | 4.14E-107 |
| KCTD12  | 3.32E-111 | -0.4623673 | 0.652 | 0.762 | 8.21E-107 |
| HNRNPK  | 9.23E-111 | -0.3375578 | 0.888 | 0.926 | 2.29E-106 |
| TET2    | 1.55E-110 | -0.4017492 | 0.221 | 0.457 | 3.85E-106 |
| PRCP    | 1.92E-110 | -0.3107002 | 0.21  | 0.46  | 4.74E-106 |
| S100A4  | 2.30E-110 | 0.30613635 | 0.995 | 0.932 | 5.69E-106 |
| SEC14L1 | 2.69E-110 | -0.3769714 | 0.254 | 0.492 | 6.66E-106 |
| RPL23   | 4.15E-110 | -0.2861781 | 0.997 | 0.999 | 1.03E-105 |
| PPIF    | 5.52E-110 | -0.4966251 | 0.22  | 0.45  | 1.37E-105 |
| UTRN    | 1.40E-109 | -0.3700677 | 0.228 | 0.456 | 3.46E-105 |
| PTPRJ   | 1.61E-109 | -0.2962191 | 0.174 | 0.413 | 3.99E-105 |
| ENO1    | 5.34E-109 | -0.3394086 | 0.965 | 0.979 | 1.32E-104 |
| SAMSN1  | 1.57E-108 | -0.7232587 | 0.418 | 0.612 | 3.90E-104 |
| NABP1   | 9.66E-108 | -0.4541874 | 0.511 | 0.697 | 2.39E-103 |
| PEA15   | 4.31E-107 | -0.3776526 | 0.211 | 0.439 | 1.07E-102 |
| MAP3K2  | 4.92E-107 | -0.3482359 | 0.468 | 0.656 | 1.22E-102 |
| NFKBIA  | 5.80E-107 | -0.7322252 | 0.803 | 0.885 | 1.44E-102 |
| AZI2    | 1.54E-106 | 0.29880863 | 0.662 | 0.434 | 3.81E-102 |
| BAX     | 2.20E-106 | 0.25048149 | 0.927 | 0.78  | 5.45E-102 |
| YWHAZ   | 9.94E-106 | -0.3445518 | 0.901 | 0.934 | 2.46E-101 |
| GNAI3   | 1.32E-105 | -0.3479923 | 0.54  | 0.713 | 3.27E-101 |
| METTL7A | 2.32E-105 | -0.302096  | 0.073 | 0.291 | 5.74E-101 |
| RNF145  | 6.50E-105 | -0.2628487 | 0.075 | 0.295 | 1.61E-100 |
| H2AFY   | 7.34E-105 | -0.2988761 | 0.979 | 0.975 | 1.82E-100 |
| IRAK1   | 2.62E-104 | -0.3447188 | 0.354 | 0.567 | 6.47E-100 |
| SLC20A1 | 2.67E-104 | -0.339502  | 0.201 | 0.434 | 6.60E-100 |
| TPM4    | 3.39E-104 | -0.4005023 | 0.767 | 0.88  | 8.40E-100 |
| CHMP1B  | 4.01E-104 | -0.4890784 | 0.344 | 0.56  | 9.92E-100 |
| PDE4B   | 5.16E-104 | -0.4900867 | 0.081 | 0.292 | 1.28E-99  |
| RNASE1  | 5.52E-103 | -0.6886401 | 0.048 | 0.258 | 1.37E-98  |
| DUSP1   | 2.60E-102 | -0.5139517 | 0.983 | 0.98  | 6.45E-98  |
| ZFAS1   | 4.48E-102 | -0.3723248 | 0.864 | 0.934 | 1.11E-97  |
| ISG15   | 9.66E-102 | 0.36795055 | 0.731 | 0.49  | 2.39E-97  |
| CDK6    | 1.24E-101 | -0.2568188 | 0.057 | 0.266 | 3.07E-97  |
| CARD19  | 1.61E-101 | -0.2657656 | 0.166 | 0.401 | 3.99E-97  |
| PREX1   | 2.52E-101 | -0.3143072 | 0.251 | 0.476 | 6.24E-97  |
| TPD52L2 | 2.55E-101 | -0.2773745 | 0.212 | 0.447 | 6.31E-97  |
| RSRP1   | 2.96E-101 | -0.4129556 | 0.573 | 0.742 | 7.32E-97  |
| PAG1    | 3.78E-101 | 0.27545529 | 0.766 | 0.539 | 9.36E-97  |
| LRRK2   | 5.06E-101 | -0.3608175 | 0.054 | 0.257 | 1.25E-96  |
| YBX3    | 5.69E-101 | -0.3888709 | 0.866 | 0.902 | 1.41E-96  |
| C3AR1   | 4.34E-100 | -0.434069  | 0.554 | 0.675 | 1.07E-95  |
| RGS10   | 6.79E-100 | -0.3461582 | 0.68  | 0.794 | 1.68E-95  |

|         |          |            |       |       |          |
|---------|----------|------------|-------|-------|----------|
| RPL22L1 | 4.47E-99 | -0.3349225 | 0.484 | 0.675 | 1.11E-94 |
| G0S2    | 4.57E-99 | -1.3287663 | 0.072 | 0.28  | 1.13E-94 |
| C5AR1   | 1.52E-98 | -0.4661309 | 0.803 | 0.882 | 3.77E-94 |
| PLAUR   | 2.26E-98 | -0.4612245 | 0.925 | 0.93  | 5.59E-94 |
| KRT10   | 3.94E-98 | -0.2987083 | 0.374 | 0.581 | 9.76E-94 |
| RPL36A  | 6.31E-98 | -0.2883267 | 0.543 | 0.719 | 1.56E-93 |
| ZEB2    | 4.42E-97 | -0.4308617 | 0.875 | 0.924 | 1.09E-92 |
| DMXL2   | 9.88E-97 | -0.3833794 | 0.476 | 0.642 | 2.45E-92 |
| CSF1R   | 1.28E-96 | -0.4945366 | 0.397 | 0.558 | 3.18E-92 |
| MAFB    | 2.93E-96 | -0.4559633 | 0.657 | 0.793 | 7.26E-92 |
| ARGLU1  | 4.93E-96 | -0.3066538 | 0.264 | 0.484 | 1.22E-91 |
| CHD1    | 9.34E-96 | -0.467277  | 0.366 | 0.557 | 2.31E-91 |
| SSR4    | 2.56E-95 | -0.2601791 | 0.947 | 0.961 | 6.33E-91 |
| RPL39   | 3.40E-95 | -0.2506655 | 0.999 | 1     | 8.41E-91 |
| PTP4A2  | 6.98E-95 | -0.3624589 | 0.756 | 0.837 | 1.73E-90 |
| SET     | 4.69E-94 | -0.2806915 | 0.751 | 0.842 | 1.16E-89 |
| LYN     | 2.50E-93 | -0.409155  | 0.673 | 0.767 | 6.19E-89 |
| RBM39   | 2.96E-93 | -0.3556549 | 0.707 | 0.813 | 7.33E-89 |
| RHOC    | 4.68E-93 | -0.3436662 | 0.204 | 0.423 | 1.16E-88 |
| HNRNPA1 | 1.57E-92 | -0.3269777 | 0.855 | 0.905 | 3.89E-88 |
| OAZ2    | 1.16E-91 | -0.2672366 | 0.129 | 0.34  | 2.86E-87 |
| SQSTM1  | 3.67E-91 | -0.4153852 | 0.868 | 0.908 | 9.09E-87 |
| GALM    | 4.28E-91 | -0.2528545 | 0.081 | 0.281 | 1.06E-86 |
| FCGR2B  | 1.87E-90 | -0.381612  | 0.17  | 0.403 | 4.63E-86 |
| OTOA    | 2.15E-90 | -0.4004772 | 0.205 | 0.428 | 5.33E-86 |
| LPGAT1  | 3.76E-90 | -0.2633791 | 0.14  | 0.352 | 9.31E-86 |
| STAT3   | 4.96E-90 | -0.3912617 | 0.488 | 0.65  | 1.23E-85 |
| EEF1B2  | 5.28E-90 | -0.2745505 | 0.992 | 0.993 | 1.31E-85 |
| RBM47   | 6.12E-90 | -0.3367408 | 0.63  | 0.766 | 1.52E-85 |
| SRGAP1  | 6.61E-90 | -0.2629038 | 0.06  | 0.252 | 1.64E-85 |
| QKI     | 1.07E-89 | -0.2925067 | 0.752 | 0.851 | 2.65E-85 |
| EMP3    | 1.13E-89 | -0.4372253 | 0.945 | 0.966 | 2.81E-85 |
| INSIG1  | 2.38E-89 | -0.4748826 | 0.147 | 0.356 | 5.90E-85 |
| AQP9    | 5.66E-89 | -0.4261235 | 0.424 | 0.604 | 1.40E-84 |
| RPL18   | 2.77E-88 | -0.2565073 | 1     | 1     | 6.87E-84 |
| PNISR   | 3.72E-88 | -0.3325343 | 0.494 | 0.66  | 9.21E-84 |
| EIF4A1  | 5.22E-88 | -0.2825478 | 0.721 | 0.822 | 1.29E-83 |
| LBR     | 5.93E-88 | -0.2767757 | 0.136 | 0.342 | 1.47E-83 |
| CYFIP1  | 9.11E-88 | -0.3261165 | 0.498 | 0.644 | 2.25E-83 |
| AHR     | 2.40E-87 | -0.3266636 | 0.229 | 0.437 | 5.95E-83 |
| HNRNPD  | 3.69E-87 | -0.3009071 | 0.523 | 0.672 | 9.14E-83 |
| UBALD2  | 1.37E-86 | -0.3232219 | 0.349 | 0.545 | 3.39E-82 |
| EGR1    | 1.63E-86 | -0.5702935 | 0.126 | 0.322 | 4.05E-82 |
| CSRNP1  | 4.84E-86 | -0.3125191 | 0.145 | 0.346 | 1.20E-81 |
| RNASE6  | 8.09E-86 | -0.3905781 | 0.219 | 0.417 | 2.00E-81 |

|          |          |            |       |       |          |
|----------|----------|------------|-------|-------|----------|
| HNRNPF   | 8.71E-85 | -0.2807825 | 0.686 | 0.78  | 2.16E-80 |
| EIF1     | 1.08E-84 | -0.2944135 | 1     | 1     | 2.68E-80 |
| ATP6V1G1 | 1.59E-84 | -0.2745444 | 0.972 | 0.97  | 3.93E-80 |
| CXCR4    | 1.87E-84 | -0.6124987 | 0.455 | 0.667 | 4.62E-80 |
| MTHFD2   | 2.00E-84 | -0.3325432 | 0.362 | 0.563 | 4.95E-80 |
| USF2     | 2.27E-84 | -0.3146808 | 0.657 | 0.754 | 5.61E-80 |
| SWAP70   | 2.40E-84 | -0.2721461 | 0.245 | 0.452 | 5.94E-80 |
| ITGAX    | 3.06E-84 | -0.3686237 | 0.664 | 0.766 | 7.57E-80 |
| KLF10    | 4.60E-84 | -0.3131533 | 0.126 | 0.325 | 1.14E-79 |
| NORAD    | 4.75E-84 | -0.2666928 | 0.38  | 0.575 | 1.18E-79 |
| CHST11   | 2.00E-83 | -0.3262296 | 0.409 | 0.577 | 4.96E-79 |
| DICER1   | 2.67E-83 | -0.3280224 | 0.503 | 0.651 | 6.60E-79 |
| PIM1     | 3.54E-83 | -0.3579034 | 0.214 | 0.417 | 8.76E-79 |
| GADD45B  | 4.31E-82 | -0.3951012 | 0.487 | 0.69  | 1.07E-77 |
| BCL6     | 6.07E-82 | -0.2913651 | 0.131 | 0.327 | 1.50E-77 |
| PTEN     | 7.19E-82 | -0.3419142 | 0.456 | 0.618 | 1.78E-77 |
| H1FX     | 1.18E-81 | -0.3290133 | 0.355 | 0.557 | 2.93E-77 |
| ARID5B   | 1.31E-81 | -0.3273933 | 0.244 | 0.451 | 3.25E-77 |
| CD36     | 7.84E-81 | -0.5583793 | 0.421 | 0.616 | 1.94E-76 |
| KMT2E    | 1.66E-80 | -0.2914722 | 0.428 | 0.599 | 4.10E-76 |
| DDX17    | 4.59E-80 | -0.3203689 | 0.728 | 0.832 | 1.14E-75 |
| CLEC5A   | 4.68E-80 | -0.4818386 | 0.092 | 0.272 | 1.16E-75 |
| EIF4H    | 6.22E-80 | -0.2649248 | 0.441 | 0.617 | 1.54E-75 |
| TNIP1    | 6.29E-80 | -0.2673075 | 0.122 | 0.317 | 1.56E-75 |
| KLF9     | 2.87E-79 | -0.3142746 | 0.243 | 0.435 | 7.11E-75 |
| SF1      | 6.41E-79 | -0.2809767 | 0.405 | 0.582 | 1.59E-74 |
| SUB1     | 8.46E-79 | -0.3115863 | 0.902 | 0.918 | 2.09E-74 |
| TMEM176B | 1.34E-78 | -0.4181771 | 0.077 | 0.254 | 3.32E-74 |
| SMAP2    | 1.53E-78 | -0.4135343 | 0.481 | 0.635 | 3.79E-74 |
| TACC1    | 1.55E-78 | -0.2863655 | 0.438 | 0.607 | 3.84E-74 |
| AREG     | 5.71E-78 | -0.8777515 | 0.406 | 0.625 | 1.41E-73 |
| SLC44A1  | 7.47E-78 | -0.2771568 | 0.15  | 0.346 | 1.85E-73 |
| WSB1     | 1.01E-77 | -0.3958899 | 0.739 | 0.822 | 2.49E-73 |
| CAMK1    | 1.24E-77 | -0.2642979 | 0.133 | 0.327 | 3.07E-73 |
| NDRG1    | 1.46E-77 | -0.275823  | 0.121 | 0.311 | 3.62E-73 |
| MALT1    | 2.76E-77 | -0.2506708 | 0.127 | 0.314 | 6.84E-73 |
| LHFPL2   | 3.48E-77 | -0.3666138 | 0.37  | 0.536 | 8.62E-73 |
| TRPS1    | 6.61E-77 | -0.2776662 | 0.174 | 0.367 | 1.64E-72 |
| HIPK3    | 3.47E-76 | -0.2745534 | 0.266 | 0.462 | 8.60E-72 |
| SLPI     | 4.82E-76 | -0.3095005 | 0.086 | 0.259 | 1.19E-71 |
| UBE2J1   | 1.20E-75 | -0.3050591 | 0.406 | 0.575 | 2.97E-71 |
| LGMN     | 2.99E-75 | -0.8437412 | 0.468 | 0.627 | 7.40E-71 |
| PLEK     | 9.27E-75 | -0.5652646 | 0.651 | 0.72  | 2.30E-70 |
| MAP3K20  | 6.09E-74 | -0.2509567 | 0.134 | 0.318 | 1.51E-69 |
| CUX1     | 1.29E-73 | -0.2682964 | 0.226 | 0.418 | 3.19E-69 |

|            |          |            |       |       |          |
|------------|----------|------------|-------|-------|----------|
| TLE3       | 1.79E-73 | -0.2635735 | 0.174 | 0.36  | 4.43E-69 |
| NFIL3      | 1.96E-72 | -0.3358192 | 0.29  | 0.467 | 4.85E-68 |
| MED13L     | 2.44E-72 | -0.2534361 | 0.183 | 0.37  | 6.05E-68 |
| RYBP       | 3.21E-72 | -0.2845986 | 0.179 | 0.365 | 7.94E-68 |
| PAPSS2     | 7.13E-72 | -0.2776667 | 0.186 | 0.376 | 1.77E-67 |
| ZNF267     | 1.07E-71 | -0.2602895 | 0.188 | 0.374 | 2.66E-67 |
| TLN1       | 1.23E-70 | -0.2780702 | 0.729 | 0.8   | 3.05E-66 |
| CAPZB      | 6.65E-70 | -0.250792  | 0.861 | 0.907 | 1.65E-65 |
| IQGAP1     | 2.26E-69 | -0.2848296 | 0.914 | 0.928 | 5.60E-65 |
| MPP1       | 1.38E-68 | -0.3042092 | 0.674 | 0.731 | 3.42E-64 |
| CSNK1A1    | 4.12E-68 | -0.2856321 | 0.716 | 0.8   | 1.02E-63 |
| ASPH       | 8.01E-68 | -0.3099317 | 0.36  | 0.522 | 1.98E-63 |
| LILRB3     | 2.13E-67 | -0.2786458 | 0.476 | 0.635 | 5.26E-63 |
| HLA-A      | 1.07E-66 | -0.2741456 | 1     | 0.999 | 2.64E-62 |
| RILPL2     | 1.11E-66 | -0.337802  | 0.564 | 0.664 | 2.74E-62 |
| PPP1R15A   | 1.99E-66 | -0.3361396 | 0.605 | 0.731 | 4.93E-62 |
| NFE2L2     | 2.19E-66 | -0.336553  | 0.686 | 0.782 | 5.41E-62 |
| PSAP       | 2.24E-66 | -0.2861019 | 1     | 0.998 | 5.56E-62 |
| GPBP1      | 2.72E-66 | -0.2642632 | 0.353 | 0.516 | 6.74E-62 |
| LUC7L3     | 4.30E-66 | -0.2743412 | 0.442 | 0.586 | 1.06E-61 |
| NFKB1      | 1.09E-65 | -0.3256868 | 0.201 | 0.372 | 2.70E-61 |
| MCL1       | 1.52E-65 | -0.4911691 | 0.949 | 0.927 | 3.75E-61 |
| PMP22      | 1.71E-65 | -0.3738404 | 0.387 | 0.543 | 4.24E-61 |
| RAB20      | 2.49E-65 | -0.2725543 | 0.47  | 0.613 | 6.17E-61 |
| SRSF3      | 1.39E-64 | -0.3144434 | 0.832 | 0.863 | 3.44E-60 |
| SLC25A6    | 1.49E-64 | -0.2977281 | 0.947 | 0.967 | 3.70E-60 |
| PHC2       | 2.03E-64 | -0.3115764 | 0.336 | 0.502 | 5.03E-60 |
| IFNAR1     | 3.38E-64 | -0.2592609 | 0.385 | 0.55  | 8.36E-60 |
| AC020916.1 | 3.73E-64 | -0.318196  | 0.196 | 0.373 | 9.24E-60 |
| KDM6B      | 7.71E-64 | -0.3644395 | 0.381 | 0.528 | 1.91E-59 |
| CYSTM1     | 1.44E-63 | -0.3239981 | 0.623 | 0.71  | 3.56E-59 |
| SMCHD1     | 3.06E-63 | -0.3426636 | 0.291 | 0.455 | 7.57E-59 |
| FOLR2      | 1.28E-62 | -0.5331114 | 0.104 | 0.261 | 3.17E-58 |
| EZR        | 2.94E-62 | -0.3181607 | 0.482 | 0.624 | 7.28E-58 |
| DDX21      | 9.94E-62 | -0.3236481 | 0.74  | 0.796 | 2.46E-57 |
| MATK       | 1.03E-61 | -0.3807515 | 0.141 | 0.305 | 2.56E-57 |
| TNFRSF14   | 1.66E-61 | -0.2603373 | 0.399 | 0.554 | 4.10E-57 |
| ELL2       | 3.15E-61 | -0.3709501 | 0.402 | 0.54  | 7.81E-57 |
| ATP6V1C1   | 4.44E-61 | -0.2570089 | 0.399 | 0.551 | 1.10E-56 |
| MAP2K3     | 6.10E-61 | -0.29089   | 0.233 | 0.399 | 1.51E-56 |
| DEK        | 7.99E-61 | -0.2655777 | 0.797 | 0.845 | 1.98E-56 |
| LCP2       | 8.95E-61 | -0.3414522 | 0.436 | 0.565 | 2.22E-56 |
| WTAP       | 5.38E-60 | -0.2884188 | 0.337 | 0.492 | 1.33E-55 |
| SEC61G     | 1.64E-59 | -0.2665338 | 0.803 | 0.85  | 4.07E-55 |
| SDC2       | 2.51E-59 | -0.4487614 | 0.35  | 0.516 | 6.22E-55 |

|            |          |            |       |       |          |
|------------|----------|------------|-------|-------|----------|
| RHOQ       | 2.66E-59 | -0.2535943 | 0.662 | 0.74  | 6.59E-55 |
| PER1       | 5.85E-59 | -0.2696037 | 0.262 | 0.421 | 1.45E-54 |
| BZW1       | 9.77E-59 | -0.270285  | 0.688 | 0.766 | 2.42E-54 |
| PLP2       | 1.17E-58 | -0.2592098 | 0.435 | 0.579 | 2.89E-54 |
| PDIA6      | 1.48E-58 | -0.2849512 | 0.768 | 0.816 | 3.65E-54 |
| LRRC25     | 3.22E-58 | -0.2710746 | 0.293 | 0.447 | 7.97E-54 |
| CSGALNACT2 | 3.24E-58 | -0.2637412 | 0.452 | 0.601 | 8.01E-54 |
| ACSL3      | 4.23E-58 | -0.3090134 | 0.431 | 0.561 | 1.05E-53 |
| NPC1       | 7.13E-58 | -0.2913194 | 0.292 | 0.446 | 1.77E-53 |
| C16orf72   | 7.76E-58 | -0.2556502 | 0.276 | 0.435 | 1.92E-53 |
| MGAT4A     | 1.45E-57 | -0.2722155 | 0.282 | 0.441 | 3.59E-53 |
| CD55       | 1.64E-57 | -0.5152682 | 0.691 | 0.757 | 4.05E-53 |
| TPM3       | 4.29E-57 | -0.3051884 | 0.95  | 0.94  | 1.06E-52 |
| TUBA1A     | 9.86E-57 | -0.3489719 | 0.475 | 0.626 | 2.44E-52 |
| PLCG2      | 1.32E-56 | -0.2743004 | 0.225 | 0.39  | 3.27E-52 |
| GNAQ       | 2.18E-56 | -0.2845378 | 0.58  | 0.678 | 5.39E-52 |
| MAP4K4     | 6.67E-56 | -0.2744133 | 0.268 | 0.426 | 1.65E-51 |
| SAP30      | 9.32E-56 | -0.3658307 | 0.258 | 0.412 | 2.31E-51 |
| AOAH       | 3.26E-55 | -0.2602762 | 0.155 | 0.302 | 8.07E-51 |
| VAMP5      | 6.67E-55 | -0.330223  | 0.167 | 0.318 | 1.65E-50 |
| CREG1      | 7.34E-55 | -0.304124  | 0.882 | 0.85  | 1.82E-50 |
| PRNP       | 9.94E-55 | -0.266858  | 0.503 | 0.627 | 2.46E-50 |
| GK         | 1.36E-54 | -0.4162008 | 0.698 | 0.734 | 3.36E-50 |
| SOAT1      | 4.07E-54 | -0.3462387 | 0.68  | 0.722 | 1.01E-49 |
| CFP        | 9.20E-54 | -0.3151804 | 0.117 | 0.257 | 2.28E-49 |
| TUBA1C     | 1.36E-53 | -0.2784042 | 0.659 | 0.741 | 3.38E-49 |
| ERBIN      | 3.43E-53 | -0.2635377 | 0.335 | 0.485 | 8.50E-49 |
| CKAP4      | 3.58E-53 | -0.2578103 | 0.135 | 0.283 | 8.86E-49 |
| MS4A6A     | 3.75E-53 | -0.6800467 | 0.551 | 0.592 | 9.27E-49 |
| PLTP       | 6.17E-53 | -0.4419615 | 0.136 | 0.285 | 1.53E-48 |
| NUMB       | 6.43E-53 | -0.2716889 | 0.371 | 0.511 | 1.59E-48 |
| RAB32      | 9.35E-53 | -0.2547364 | 0.62  | 0.713 | 2.31E-48 |
| CCNL1      | 3.73E-52 | -0.3120665 | 0.602 | 0.694 | 9.24E-48 |
| FGR        | 6.84E-52 | -0.279923  | 0.752 | 0.77  | 1.69E-47 |
| RB1        | 1.63E-51 | -0.2533006 | 0.255 | 0.403 | 4.04E-47 |
| DSE        | 1.68E-51 | -0.3467631 | 0.478 | 0.576 | 4.16E-47 |
| UGCG       | 1.71E-51 | -0.2595254 | 0.231 | 0.391 | 4.23E-47 |
| PABPC1     | 6.09E-51 | -0.2604125 | 0.998 | 0.993 | 1.51E-46 |
| HSPA1B     | 7.61E-51 | -0.4122607 | 0.391 | 0.548 | 1.88E-46 |
| AHNAK      | 1.31E-49 | -0.2598596 | 0.807 | 0.875 | 3.25E-45 |
| CMTM6      | 2.86E-49 | -0.3051629 | 0.831 | 0.833 | 7.09E-45 |
| HNRNPDL    | 7.85E-49 | -0.256069  | 0.819 | 0.841 | 1.94E-44 |
| SCGB1A1    | 1.45E-48 | -0.3029542 | 0.418 | 0.534 | 3.59E-44 |
| PLPP3      | 9.96E-48 | -0.3168481 | 0.219 | 0.358 | 2.46E-43 |
| BTG2       | 1.05E-47 | -0.2843698 | 0.243 | 0.392 | 2.59E-43 |



|           |          |            |       |       |          |
|-----------|----------|------------|-------|-------|----------|
| IFI16     | 5.04E-47 | -0.2717231 | 0.686 | 0.741 | 1.25E-42 |
| IVNS1ABP  | 4.48E-46 | -0.363671  | 0.52  | 0.621 | 1.11E-41 |
| NR4A1     | 4.61E-45 | -0.325201  | 0.327 | 0.462 | 1.14E-40 |
| SORL1     | 1.01E-44 | -0.3079935 | 0.196 | 0.328 | 2.51E-40 |
| LGALS1    | 2.46E-43 | -0.2823558 | 0.993 | 0.989 | 6.09E-39 |
| UCP2      | 3.21E-43 | -0.2562877 | 0.64  | 0.701 | 7.96E-39 |
| HNRNPA2B1 | 5.09E-43 | -0.2831093 | 0.986 | 0.966 | 1.26E-38 |
| GLIPR1    | 6.88E-43 | -0.2703727 | 0.661 | 0.719 | 1.70E-38 |
| ZFAND5    | 7.32E-43 | -0.278572  | 0.876 | 0.913 | 1.81E-38 |
| CALU      | 1.51E-42 | -0.2540755 | 0.587 | 0.642 | 3.74E-38 |
| ATP6V1A   | 2.07E-42 | -0.279369  | 0.582 | 0.649 | 5.12E-38 |
| PLSCR1    | 3.53E-42 | -0.269189  | 0.643 | 0.707 | 8.74E-38 |
| STK17B    | 6.32E-42 | -0.3402467 | 0.362 | 0.465 | 1.56E-37 |
| MT-ND4L   | 9.30E-42 | -0.2541428 | 0.986 | 0.983 | 2.30E-37 |
| JUND      | 6.40E-39 | -0.2789819 | 0.965 | 0.967 | 1.58E-34 |
| UBE2D1    | 1.24E-38 | -0.2514068 | 0.449 | 0.557 | 3.08E-34 |
| VCAN      | 3.14E-38 | -1.1143267 | 0.458 | 0.543 | 7.78E-34 |
| MAP3K8    | 3.99E-38 | -0.3967849 | 0.501 | 0.565 | 9.87E-34 |
| IFNGR2    | 4.78E-38 | -0.2641773 | 0.619 | 0.666 | 1.18E-33 |
| PELI1     | 6.26E-37 | -0.2924411 | 0.227 | 0.348 | 1.55E-32 |
| CPD       | 5.62E-35 | -0.2541506 | 0.266 | 0.383 | 1.39E-30 |
| NFKBIZ    | 1.82E-33 | -0.2999714 | 0.239 | 0.355 | 4.51E-29 |
| H3F3A     | 5.36E-33 | -0.3375122 | 1     | 1     | 1.33E-28 |
| LITAF     | 5.79E-33 | -0.3163387 | 0.979 | 0.959 | 1.43E-28 |
| ATP1B3    | 6.45E-33 | -0.3152146 | 0.963 | 0.948 | 1.60E-28 |
| IL1B      | 1.40E-29 | -0.314377  | 0.388 | 0.238 | 3.47E-25 |
| SFTPC     | 1.74E-29 | -0.3376439 | 0.445 | 0.524 | 4.31E-25 |
| DNAJB1    | 2.91E-29 | -0.2518812 | 0.462 | 0.58  | 7.20E-25 |
| TSC22D3   | 5.14E-28 | -0.3218454 | 0.812 | 0.83  | 1.27E-23 |
| NR4A3     | 6.11E-28 | -0.2902845 | 0.342 | 0.442 | 1.51E-23 |
| OGFRL1    | 4.34E-27 | -0.2595649 | 0.576 | 0.627 | 1.07E-22 |
| MALAT1    | 4.30E-26 | -0.4313721 | 1     | 1     | 1.06E-21 |
| C15orf48  | 9.45E-25 | -0.4859415 | 0.395 | 0.471 | 2.34E-20 |
| CHIT1     | 1.02E-24 | -1.2763043 | 0.179 | 0.266 | 2.53E-20 |
| HCLS1     | 3.95E-24 | -0.2667962 | 0.748 | 0.716 | 9.78E-20 |
| IGKC      | 1.12E-23 | -0.4909022 | 0.195 | 0.29  | 2.78E-19 |
| GDF15     | 7.49E-23 | -0.4494828 | 0.167 | 0.264 | 1.86E-18 |
| S100A8    | 2.43E-22 | -2.2878879 | 0.607 | 0.612 | 6.02E-18 |
| ACSL1     | 6.95E-22 | -0.2774303 | 0.795 | 0.819 | 1.72E-17 |
| ALCAM     | 7.06E-22 | -0.305124  | 0.707 | 0.703 | 1.75E-17 |
| ABL2      | 1.30E-20 | -0.2674839 | 0.42  | 0.487 | 3.22E-16 |
| HSPA1A    | 1.73E-20 | -0.4392277 | 0.826 | 0.812 | 4.28E-16 |
| MAF       | 1.07E-18 | -0.2513743 | 0.317 | 0.387 | 2.65E-14 |
| CXCL2     | 1.12E-17 | -0.3873118 | 0.285 | 0.364 | 2.77E-13 |
| RNF144B   | 1.78E-17 | -0.2579784 | 0.335 | 0.395 | 4.40E-13 |

|          |            |            |       |       |            |
|----------|------------|------------|-------|-------|------------|
| MGLL     | 1.41E-16   | -0.2965506 | 0.433 | 0.469 | 3.49E-12   |
| GPNMB    | 1.56E-13   | -0.665607  | 0.988 | 0.806 | 3.85E-09   |
| CPM      | 2.34E-13   | -0.3113521 | 0.799 | 0.742 | 5.79E-09   |
| MT2A     | 5.95E-12   | -0.2990372 | 0.773 | 0.695 | 1.47E-07   |
| MFSD12   | 7.44E-12   | -0.2651948 | 0.603 | 0.605 | 1.84E-07   |
| SCGB3A1  | 2.03E-11   | -0.3264673 | 0.605 | 0.605 | 5.02E-07   |
| HLA-DQA2 | 2.11E-09   | 0.38336982 | 0.362 | 0.354 | 5.22E-05   |
| BCL2A1   | 6.95E-09   | -0.2717439 | 0.907 | 0.835 | 0.00017208 |
| EREG     | 1.16E-07   | -0.4508865 | 0.24  | 0.281 | 0.00287913 |
| HLA-DRB5 | 2.43E-07   | 0.48723033 | 0.392 | 0.417 | 0.0060173  |
| THBD     | 1.70E-06   | -0.3201083 | 0.418 | 0.428 | 0.04209296 |
| SERPINB1 | 2.22E-06   | -0.2601516 | 0.868 | 0.847 | 0.05500138 |
| IL1RN    | 4.53E-06   | -0.3426468 | 0.411 | 0.332 | 0.11226087 |
| S100A9   | 5.41E-06   | -1.5714578 | 0.976 | 0.902 | 0.13386633 |
| CIR1     | 0.00175633 | -0.3202151 | 0.562 | 0.531 | 1          |
| GM2A     | 0.00401843 | -0.3267038 | 0.72  | 0.632 | 1          |
| HMOX1    | 0.03125796 | -0.353167  | 0.625 | 0.586 | 1          |
| CTSL     | 0.58018314 | -0.3150765 | 0.986 | 0.914 | 1          |
