# Supplementary material
Source: PubMed Central journal article supplement (PMC9771864)
Supplement: NIHMS1819536-supplement-Table_S4.pdf [file NIHMS1819536-supplement-Table_S4.pdf]

|         | p_val | avg_logFC  | pct.1 | pct.2 | p_val_adj |
|---------|-------|------------|-------|-------|-----------|
| SPP1    | 0     | 3.30283596 | 0.802 | 0.205 | 0         |
| CCL2    | 0     | 1.9948943  | 0.459 | 0.077 | 0         |
| LGMN    | 0     | 1.33368645 | 0.828 | 0.496 | 0         |
| RGS1    | 0     | 1.19074799 | 0.719 | 0.268 | 0         |
| MARCKS  | 0     | 1.16429467 | 0.722 | 0.179 | 0         |
| CCL3    | 0     | 1.15787983 | 0.538 | 0.131 | 0         |
| A2M     | 0     | 0.98929751 | 0.686 | 0.186 | 0         |
| CTSB    | 0     | 0.96867367 | 1     | 0.995 | 0         |
| EMP1    | 0     | 0.943562   | 0.736 | 0.269 | 0         |
| CD84    | 0     | 0.932686   | 0.833 | 0.341 | 0         |
| LILRB4  | 0     | 0.9031076  | 0.827 | 0.342 | 0         |
| CALM3   | 0     | 0.88730018 | 0.873 | 0.654 | 0         |
| GPR183  | 0     | 0.8415434  | 0.66  | 0.203 | 0         |
| FNIP2   | 0     | 0.81529597 | 0.826 | 0.384 | 0         |
| PLEKHO1 | 0     | 0.74960591 | 0.656 | 0.206 | 0         |
| CD48    | 0     | 0.73841137 | 0.667 | 0.182 | 0         |
| FPR3    | 0     | 0.68726644 | 0.72  | 0.317 | 0         |
| SGK1    | 0     | 0.66610425 | 0.918 | 0.679 | 0         |
| ABCA1   | 0     | 0.63707043 | 0.702 | 0.296 | 0         |
| HM13    | 0     | 0.63642167 | 0.891 | 0.542 | 0         |
| LIMS1   | 0     | 0.60535518 | 0.947 | 0.825 | 0         |
| TTYH3   | 0     | 0.58333966 | 0.679 | 0.213 | 0         |
| LGALS1  | 0     | 0.57432743 | 0.994 | 0.993 | 0         |
| PEA15   | 0     | 0.56913487 | 0.601 | 0.182 | 0         |
| BCAT1   | 0     | 0.56184105 | 0.773 | 0.387 | 0         |
| PKM     | 0     | 0.49634252 | 0.979 | 0.894 | 0         |
| PLXNC1  | 0     | 0.47733876 | 0.497 | 0.087 | 0         |
| MERTK   | 0     | 0.4662937  | 0.444 | 0.064 | 0         |
| NPC2    | 0     | 0.45058585 | 0.998 | 0.998 | 0         |
| UQCRH   | 0     | -0.373841  | 0.958 | 0.992 | 0         |
| RPS13   | 0     | -0.4018476 | 0.999 | 1     | 0         |
| ECH1    | 0     | -0.4193362 | 0.558 | 0.849 | 0         |
| TPT1    | 0     | -0.4347695 | 1     | 1     | 0         |
| PARAL1  | 0     | -0.4358691 | 0.064 | 0.469 | 0         |
| CPE     | 0     | -0.4368413 | 0.013 | 0.337 | 0         |
| HDDC2   | 0     | -0.44388   | 0.391 | 0.758 | 0         |
| MS4A7   | 0     | -0.4581219 | 0.94  | 0.981 | 0         |
| HLA-C   | 0     | -0.4654576 | 1     | 1     | 0         |
| FHL1    | 0     | -0.5086502 | 0.05  | 0.436 | 0         |
| CARD16  | 0     | -0.5150242 | 0.335 | 0.692 | 0         |
| TCF7L2  | 0     | -0.5186155 | 0.248 | 0.644 | 0         |
| AMIGO2  | 0     | -0.5226192 | 0.133 | 0.597 | 0         |
| APIP    | 0     | -0.5248723 | 0.337 | 0.754 | 0         |
| CSTA    | 0     | -0.5283578 | 0.518 | 0.875 | 0         |

|            |           |            |       |       |           |
|------------|-----------|------------|-------|-------|-----------|
| JAML       | 0         | -0.5618308 | 0.293 | 0.682 | 0         |
| GYPC       | 0         | -0.5708427 | 0.459 | 0.807 | 0         |
| UBB        | 0         | -0.5890095 | 0.993 | 0.999 | 0         |
| MME        | 0         | -0.5953736 | 0.099 | 0.469 | 0         |
| PPARG      | 0         | -0.6110167 | 0.622 | 0.92  | 0         |
| ALOX5      | 0         | -0.6222565 | 0.653 | 0.841 | 0         |
| TREM1      | 0         | -0.6279699 | 0.476 | 0.803 | 0         |
| TKT        | 0         | -0.6607396 | 0.874 | 0.987 | 0         |
| ABHD5      | 0         | -0.6813329 | 0.555 | 0.91  | 0         |
| CTSC       | 0         | -0.6898143 | 0.89  | 0.983 | 0         |
| SVIL       | 0         | -0.7128398 | 0.13  | 0.67  | 0         |
| PDLIM1     | 0         | -0.7297069 | 0.188 | 0.565 | 0         |
| VSIG4      | 0         | -0.7297283 | 0.791 | 0.944 | 0         |
| GLDN       | 0         | -0.7369432 | 0.102 | 0.519 | 0         |
| PLA2G16    | 0         | -0.7524615 | 0.188 | 0.663 | 0         |
| ALOX5AP    | 0         | -0.7701429 | 0.749 | 0.926 | 0         |
| AKR1C3     | 0         | -0.7895276 | 0.145 | 0.562 | 0         |
| LGALS3BP   | 0         | -0.807229  | 0.175 | 0.675 | 0         |
| GPD1       | 0         | -0.8113859 | 0.024 | 0.49  | 0         |
| MCEMP1     | 0         | -0.8727933 | 0.451 | 0.799 | 0         |
| C1QB       | 0         | -0.9319413 | 0.711 | 0.922 | 0         |
| C1QA       | 0         | -0.9766247 | 0.71  | 0.939 | 0         |
| PCOLCE2    | 0         | -0.9832754 | 0.128 | 0.718 | 0         |
| FAM89A     | 0         | -1.0054767 | 0.201 | 0.828 | 0         |
| SERPINA1   | 0         | -1.0691101 | 0.643 | 0.896 | 0         |
| INHBA      | 0         | -1.1939465 | 0.136 | 0.569 | 0         |
| AC026369.3 | 0         | -1.2082625 | 0.101 | 0.711 | 0         |
| ALDH2      | 0         | -1.3045516 | 0.678 | 0.953 | 0         |
| FABP4      | 0         | -2.0163981 | 0.222 | 0.736 | 0         |
| LDHB       | 1.53E-305 | -0.6181672 | 0.558 | 0.812 | 3.79E-301 |
| FAM20C     | 3.33E-305 | 0.56697224 | 0.651 | 0.266 | 8.24E-301 |
| SMIM3      | 4.58E-305 | 0.50258338 | 0.601 | 0.189 | 1.13E-300 |
| MLPH       | 9.51E-305 | -0.442316  | 0.12  | 0.479 | 2.35E-300 |
| AQP3       | 3.26E-303 | -0.7007463 | 0.169 | 0.53  | 8.06E-299 |
| PHLDA3     | 5.09E-293 | -0.4731545 | 0.308 | 0.699 | 1.26E-288 |
| IGFBP2     | 1.43E-289 | -0.9611267 | 0.096 | 0.427 | 3.54E-285 |
| MMP9       | 1.19E-288 | 1.86942388 | 0.351 | 0.024 | 2.95E-284 |
| C1QC       | 7.78E-284 | -0.6362589 | 0.62  | 0.936 | 1.93E-279 |
| LHFPL2     | 1.02E-282 | 0.53946945 | 0.763 | 0.417 | 2.53E-278 |
| HPGD       | 1.81E-282 | -0.4602363 | 0.357 | 0.769 | 4.48E-278 |
| STMN1      | 4.26E-282 | -0.5201672 | 0.312 | 0.685 | 1.05E-277 |
| CES1       | 3.78E-281 | -0.946273  | 0.169 | 0.522 | 9.37E-277 |
| STAC       | 1.11E-279 | -0.3347326 | 0.132 | 0.483 | 2.76E-275 |
| PLA2G7     | 5.30E-279 | 0.74868647 | 0.799 | 0.447 | 1.31E-274 |
| CD99       | 1.80E-278 | 0.49466758 | 0.919 | 0.726 | 4.45E-274 |

|          |           |            |       |       |           |
|----------|-----------|------------|-------|-------|-----------|
| MATK     | 1.96E-278 | 0.67090094 | 0.528 | 0.16  | 4.84E-274 |
| PLTP     | 3.35E-278 | 0.79541187 | 0.5   | 0.133 | 8.29E-274 |
| FFAR4    | 8.83E-278 | -0.3685415 | 0.077 | 0.402 | 2.19E-273 |
| SLC43A3  | 6.90E-277 | 0.49196754 | 0.664 | 0.297 | 1.71E-272 |
| SEC11A   | 5.71E-275 | -0.3396788 | 0.908 | 0.985 | 1.41E-270 |
| SOD2     | 1.37E-273 | 0.70027997 | 0.837 | 0.499 | 3.40E-269 |
| GCHFR    | 2.51E-273 | -0.5712781 | 0.722 | 0.962 | 6.20E-269 |
| POR      | 2.66E-273 | -0.3904957 | 0.462 | 0.797 | 6.58E-269 |
| RNF130   | 2.46E-270 | 0.40381664 | 0.964 | 0.882 | 6.08E-266 |
| ABCG1    | 1.16E-267 | -0.5962875 | 0.526 | 0.79  | 2.88E-263 |
| TYMP     | 1.01E-266 | 0.50023947 | 0.992 | 0.957 | 2.50E-262 |
| CSF1R    | 5.09E-266 | 0.6013769  | 0.659 | 0.318 | 1.26E-261 |
| FAM198B  | 1.36E-264 | 0.36473669 | 0.501 | 0.124 | 3.37E-260 |
| EMP3     | 2.11E-264 | 0.67747464 | 0.975 | 0.941 | 5.23E-260 |
| RETN     | 4.47E-263 | -0.874712  | 0.286 | 0.655 | 1.11E-258 |
| CYFIP1   | 1.38E-262 | 0.46862463 | 0.804 | 0.517 | 3.42E-258 |
| RPL28    | 1.95E-262 | -0.3020808 | 1     | 1     | 4.83E-258 |
| TBC1D10C | 2.64E-255 | -0.3309857 | 0.093 | 0.407 | 6.54E-251 |
| RHOC     | 3.84E-255 | 0.49425362 | 0.544 | 0.178 | 9.51E-251 |
| LY6E     | 4.79E-255 | -0.5749768 | 0.542 | 0.816 | 1.19E-250 |
| SERPING1 | 4.85E-255 | -0.8235707 | 0.203 | 0.53  | 1.20E-250 |
| IL4I1    | 8.66E-255 | 0.44643223 | 0.377 | 0.054 | 2.14E-250 |
| CYB5A    | 3.01E-254 | -0.4236033 | 0.589 | 0.864 | 7.46E-250 |
| RGS2     | 1.04E-252 | 0.82796522 | 0.658 | 0.323 | 2.58E-248 |
| LTA4H    | 6.80E-252 | -0.4586757 | 0.778 | 0.951 | 1.68E-247 |
| CAT      | 7.37E-248 | -0.3856121 | 0.564 | 0.819 | 1.83E-243 |
| SARAF    | 1.17E-247 | -0.3168989 | 0.906 | 0.981 | 2.90E-243 |
| RBP4     | 1.79E-246 | -0.8874176 | 0.166 | 0.495 | 4.42E-242 |
| C3AR1    | 6.44E-245 | 0.56603194 | 0.764 | 0.509 | 1.59E-240 |
| OLR1     | 1.40E-242 | -0.4855667 | 0.675 | 0.891 | 3.45E-238 |
| H2AFZ    | 2.51E-241 | -0.3612727 | 0.865 | 0.969 | 6.20E-237 |
| AP1S2    | 2.95E-241 | 0.48282912 | 0.738 | 0.415 | 7.30E-237 |
| STAB1    | 1.69E-239 | 0.68704472 | 0.307 | 0.023 | 4.19E-235 |
| C15orf48 | 1.36E-234 | 0.86558386 | 0.69  | 0.374 | 3.36E-230 |
| ATP10A   | 1.02E-233 | -0.2818846 | 0.051 | 0.323 | 2.52E-229 |
| PPIC     | 2.92E-231 | -0.3896548 | 0.163 | 0.487 | 7.24E-227 |
| ADAMTSL4 | 4.01E-231 | -0.3807885 | 0.378 | 0.691 | 9.93E-227 |
| FRMD4B   | 6.26E-231 | 0.38251139 | 0.494 | 0.155 | 1.55E-226 |
| AGRP     | 3.57E-230 | -0.5193449 | 0.087 | 0.38  | 8.84E-226 |
| MTSS1    | 6.79E-230 | 0.34868577 | 0.311 | 0.029 | 1.68E-225 |
| DECR1    | 1.98E-228 | -0.5082507 | 0.592 | 0.785 | 4.90E-224 |
| PLEK     | 6.18E-228 | 0.65170632 | 0.797 | 0.543 | 1.53E-223 |
| TNFRSF1B | 9.05E-224 | 0.43260005 | 0.548 | 0.208 | 2.24E-219 |
| KIAA0930 | 3.35E-223 | 0.52299705 | 0.745 | 0.45  | 8.30E-219 |
| CD52     | 2.92E-219 | -0.587841  | 0.797 | 0.931 | 7.22E-215 |

|          |           |            |       |       |           |
|----------|-----------|------------|-------|-------|-----------|
| RPS19    | 1.08E-218 | -0.3233267 | 0.999 | 1     | 2.66E-214 |
| LEPROTL1 | 8.19E-218 | -0.3192657 | 0.594 | 0.84  | 2.03E-213 |
| C1orf162 | 1.31E-216 | -0.4157167 | 0.766 | 0.904 | 3.23E-212 |
| ADAM9    | 2.53E-214 | 0.41206754 | 0.734 | 0.43  | 6.25E-210 |
| CCPG1    | 6.88E-212 | -0.4167411 | 0.562 | 0.826 | 1.70E-207 |
| AHNAK    | 1.12E-211 | 0.45631774 | 0.926 | 0.768 | 2.78E-207 |
| LRPAP1   | 3.61E-208 | -0.3587395 | 0.873 | 0.969 | 8.93E-204 |
| CITED2   | 4.01E-206 | -0.4221796 | 0.523 | 0.787 | 9.92E-202 |
| JPT1     | 4.63E-206 | -0.4770659 | 0.635 | 0.798 | 1.15E-201 |
| CPM      | 4.15E-205 | 0.6195195  | 0.866 | 0.744 | 1.03E-200 |
| CTSK     | 9.74E-205 | 1.77918475 | 0.348 | 0.072 | 2.41E-200 |
| CTSW     | 1.52E-204 | -0.2639056 | 0.031 | 0.263 | 3.76E-200 |
| FOLR2    | 2.57E-204 | 0.84312586 | 0.385 | 0.098 | 6.37E-200 |
| ATP1A1   | 2.78E-204 | 0.44013289 | 0.786 | 0.536 | 6.89E-200 |
| RPS20    | 5.45E-204 | -0.2931255 | 0.998 | 1     | 1.35E-199 |
| RNF149   | 4.09E-203 | -0.3819837 | 0.625 | 0.829 | 1.01E-198 |
| PRKCB    | 1.02E-200 | 0.3419452  | 0.432 | 0.124 | 2.53E-196 |
| EVL      | 1.87E-200 | -0.5158839 | 0.433 | 0.691 | 4.62E-196 |
| MTRNR2L1 | 2.41E-200 | -0.4226981 | 0.05  | 0.295 | 5.96E-196 |
| ATP6V1B2 | 3.14E-200 | 0.415605   | 0.914 | 0.795 | 7.78E-196 |
| PTPRE    | 5.43E-200 | 0.48672077 | 0.602 | 0.291 | 1.34E-195 |
| RPS4Y1   | 5.76E-200 | -0.6516318 | 0.261 | 0.551 | 1.42E-195 |
| OASL     | 2.22E-198 | -0.3545409 | 0.117 | 0.396 | 5.50E-194 |
| MFSD1    | 2.27E-198 | 0.41552611 | 0.881 | 0.721 | 5.62E-194 |
| ENO1     | 1.40E-196 | 0.40982665 | 0.98  | 0.963 | 3.46E-192 |
| ICAM1    | 2.42E-196 | 0.3938061  | 0.415 | 0.116 | 5.99E-192 |
| ZFP36L1  | 7.67E-196 | 0.63264327 | 0.677 | 0.368 | 1.90E-191 |
| ANTXR2   | 9.38E-196 | 0.27493317 | 0.334 | 0.061 | 2.32E-191 |
| CORO1A   | 1.39E-195 | 0.42178808 | 0.415 | 0.118 | 3.44E-191 |
| THBS1    | 4.24E-195 | -0.5541517 | 0.189 | 0.499 | 1.05E-190 |
| TNNI2    | 1.81E-194 | -0.3394041 | 0.188 | 0.475 | 4.49E-190 |
| SLAMF8   | 3.09E-194 | 0.39317915 | 0.655 | 0.348 | 7.64E-190 |
| NR4A2    | 7.31E-194 | 0.61940098 | 0.71  | 0.43  | 1.81E-189 |
| CD63     | 1.87E-193 | 0.35237293 | 1     | 1     | 4.63E-189 |
| PLXND1   | 8.87E-193 | 0.35562907 | 0.558 | 0.244 | 2.19E-188 |
| CHI3L1   | 3.50E-192 | 2.08648929 | 0.282 | 0.035 | 8.67E-188 |
| TMEM176B | 8.30E-192 | 0.60056047 | 0.365 | 0.089 | 2.05E-187 |
| RNASE1   | 3.03E-191 | 1.01925216 | 0.314 | 0.053 | 7.51E-187 |
| SNX2     | 2.10E-190 | -0.3895866 | 0.815 | 0.922 | 5.21E-186 |
| TOMM7    | 3.90E-190 | -0.2590683 | 0.957 | 0.988 | 9.66E-186 |
| PMP22    | 9.08E-190 | 0.53127568 | 0.718 | 0.448 | 2.25E-185 |
| ITGAM    | 3.39E-188 | 0.38475979 | 0.747 | 0.431 | 8.39E-184 |
| PYCARD   | 1.46E-187 | -0.4269976 | 0.79  | 0.874 | 3.61E-183 |
| GALM     | 3.14E-187 | 0.34390047 | 0.434 | 0.138 | 7.78E-183 |
| CTSZ     | 3.81E-187 | 0.55324358 | 0.995 | 0.995 | 9.42E-183 |

|            |           |            |       |       |           |
|------------|-----------|------------|-------|-------|-----------|
| CCR1       | 4.84E-187 | 0.41910229 | 0.736 | 0.438 | 1.20E-182 |
| LILRB2     | 1.97E-186 | 0.33908672 | 0.457 | 0.16  | 4.87E-182 |
| TPM3       | 2.08E-186 | 0.42553145 | 0.961 | 0.888 | 5.15E-182 |
| AL035446.1 | 2.34E-186 | -0.2630891 | 0.176 | 0.459 | 5.78E-182 |
| GLRX       | 4.44E-186 | -0.4035712 | 0.877 | 0.956 | 1.10E-181 |
| PTPMT1     | 8.04E-186 | -0.3418446 | 0.485 | 0.733 | 1.99E-181 |
| CD300LF    | 1.27E-185 | -0.3039695 | 0.392 | 0.682 | 3.13E-181 |
| PPDPF      | 6.71E-185 | -0.3659649 | 0.9   | 0.978 | 1.66E-180 |
| KCTD12     | 1.31E-184 | 0.53505773 | 0.792 | 0.61  | 3.25E-180 |
| 11-Sep     | 3.69E-184 | -0.4237996 | 0.549 | 0.73  | 9.13E-180 |
| LSM6       | 1.20E-183 | -0.283268  | 0.503 | 0.767 | 2.97E-179 |
| CHIT1      | 1.12E-182 | 1.88251156 | 0.449 | 0.172 | 2.77E-178 |
| MSR1       | 1.15E-182 | -0.4361716 | 0.836 | 0.932 | 2.86E-178 |
| PSAP       | 2.04E-182 | 0.37381227 | 1     | 1     | 5.06E-178 |
| SNX10      | 4.65E-182 | -0.3256852 | 0.808 | 0.952 | 1.15E-177 |
| DAB2       | 6.76E-182 | 0.39848832 | 0.972 | 0.964 | 1.67E-177 |
| MARCO      | 7.46E-182 | -0.4047517 | 0.787 | 0.968 | 1.85E-177 |
| ARID5B     | 8.29E-182 | 0.45614135 | 0.552 | 0.249 | 2.05E-177 |
| PDIA6      | 9.14E-182 | 0.44339393 | 0.878 | 0.741 | 2.26E-177 |
| MAFB       | 1.64E-181 | 0.57085142 | 0.845 | 0.671 | 4.07E-177 |
| SELENOP    | 1.05E-179 | 1.21284113 | 0.254 | 0.025 | 2.61E-175 |
| IGBP1      | 1.18E-179 | -0.3210786 | 0.376 | 0.648 | 2.93E-175 |
| MYL12A     | 1.31E-179 | -0.2876209 | 0.979 | 0.994 | 3.24E-175 |
| TAX1BP1    | 5.77E-179 | -0.2872137 | 0.804 | 0.926 | 1.43E-174 |
| IL6R       | 7.39E-177 | 0.29698019 | 0.382 | 0.104 | 1.83E-172 |
| HMGN2      | 1.44E-176 | -0.2978882 | 0.782 | 0.931 | 3.57E-172 |
| RPL30      | 4.19E-176 | -0.2796579 | 1     | 1     | 1.04E-171 |
| PLBD1      | 2.16E-175 | -0.4400254 | 0.671 | 0.839 | 5.36E-171 |
| SNCA       | 3.04E-174 | 0.29496615 | 0.425 | 0.133 | 7.52E-170 |
| RPS14      | 6.43E-174 | -0.2719108 | 1     | 1     | 1.59E-169 |
| NCF2       | 1.14E-173 | -0.2778345 | 0.903 | 0.984 | 2.82E-169 |
| SH3BGRL3   | 8.31E-173 | 0.41868228 | 0.999 | 0.998 | 2.06E-168 |
| SPOCD1     | 1.80E-172 | -0.3636204 | 0.174 | 0.447 | 4.46E-168 |
| RARRES1    | 8.93E-172 | 0.74726704 | 0.333 | 0.083 | 2.21E-167 |
| SRGN       | 1.51E-171 | 0.5743206  | 0.992 | 0.986 | 3.73E-167 |
| RGL1       | 3.25E-171 | 0.38383636 | 0.41  | 0.13  | 8.04E-167 |
| SPHK1      | 1.28E-170 | 0.28409327 | 0.281 | 0.044 | 3.16E-166 |
| PAG1       | 2.91E-170 | -0.4001704 | 0.488 | 0.736 | 7.21E-166 |
| CDK6       | 5.65E-170 | 0.27969651 | 0.333 | 0.075 | 1.40E-165 |
| ACP2       | 2.40E-168 | 0.39655253 | 0.625 | 0.349 | 5.93E-164 |
| NAGK       | 2.86E-168 | 0.44096126 | 0.791 | 0.605 | 7.08E-164 |
| CTSH       | 9.71E-168 | 0.40348664 | 0.954 | 0.875 | 2.40E-163 |
| PEBP1      | 1.17E-167 | -0.2905486 | 0.879 | 0.974 | 2.90E-163 |
| PNPLA6     | 1.31E-167 | -0.4410178 | 0.5   | 0.686 | 3.23E-163 |
| VDAC2      | 2.70E-167 | -0.3006737 | 0.806 | 0.927 | 6.67E-163 |

|         |           |            |       |       |           |
|---------|-----------|------------|-------|-------|-----------|
| CMKLR1  | 3.63E-166 | 0.28292841 | 0.304 | 0.061 | 8.98E-162 |
| CALU    | 4.65E-166 | 0.40469904 | 0.806 | 0.616 | 1.15E-161 |
| MREG    | 6.09E-166 | 0.26996218 | 0.299 | 0.057 | 1.51E-161 |
| ATP1B1  | 1.41E-165 | -0.3677365 | 0.38  | 0.65  | 3.48E-161 |
| ATP13A3 | 1.64E-164 | 0.42458813 | 0.675 | 0.408 | 4.05E-160 |
| FYB1    | 7.63E-164 | 0.46655391 | 0.757 | 0.55  | 1.89E-159 |
| S100A13 | 3.60E-163 | -0.4143203 | 0.196 | 0.457 | 8.92E-159 |
| GPNMB   | 8.96E-162 | 0.52617187 | 0.957 | 0.989 | 2.22E-157 |
| HNMT    | 1.52E-161 | -0.292363  | 0.754 | 0.9   | 3.75E-157 |
| IRAK1   | 1.59E-161 | 0.38608626 | 0.691 | 0.424 | 3.94E-157 |
| RNASE6  | 4.66E-161 | 0.41048695 | 0.469 | 0.195 | 1.15E-156 |
| NPC1    | 5.16E-161 | 0.40600796 | 0.628 | 0.361 | 1.28E-156 |
| PTPRJ   | 5.66E-159 | 0.29464542 | 0.472 | 0.189 | 1.40E-154 |
| SLAMF7  | 6.87E-159 | 0.49560743 | 0.265 | 0.042 | 1.70E-154 |
| FAM129B | 8.38E-159 | 0.30702614 | 0.354 | 0.1   | 2.07E-154 |
| PHYH    | 2.53E-158 | -0.2562549 | 0.354 | 0.617 | 6.26E-154 |
| CLEC5A  | 2.82E-158 | 0.59850281 | 0.35  | 0.105 | 6.98E-154 |
| SDC2    | 4.36E-158 | 0.59560316 | 0.707 | 0.445 | 1.08E-153 |
| CYTH4   | 1.79E-157 | 0.2877997  | 0.431 | 0.158 | 4.42E-153 |
| KCNN4   | 3.64E-157 | 0.26478917 | 0.338 | 0.088 | 9.01E-153 |
| DOCK11  | 6.88E-157 | -0.2665887 | 0.409 | 0.666 | 1.70E-152 |
| ECM1    | 9.21E-157 | 0.25292522 | 0.262 | 0.041 | 2.28E-152 |
| UCP2    | 1.15E-155 | 0.39574421 | 0.776 | 0.566 | 2.84E-151 |
| HOMER3  | 2.92E-155 | 0.29418141 | 0.5   | 0.213 | 7.24E-151 |
| CEBPD   | 1.14E-154 | 0.66200648 | 0.677 | 0.433 | 2.81E-150 |
| FOSB    | 7.56E-154 | 0.57893971 | 0.696 | 0.444 | 1.87E-149 |
| DOCK8   | 1.50E-153 | -0.319474  | 0.502 | 0.711 | 3.71E-149 |
| RNF145  | 2.30E-153 | 0.27077816 | 0.344 | 0.096 | 5.68E-149 |
| NACA    | 8.28E-153 | -0.2643985 | 0.999 | 1     | 2.05E-148 |
| ITGAX   | 9.29E-153 | 0.38304639 | 0.854 | 0.676 | 2.30E-148 |
| ALCAM   | 1.50E-152 | 0.51655634 | 0.825 | 0.688 | 3.72E-148 |
| SLC7A7  | 1.57E-152 | -0.2590418 | 0.837 | 0.95  | 3.88E-148 |
| FGL2    | 1.70E-152 | 0.5588913  | 0.353 | 0.108 | 4.20E-148 |
| ADGRE2  | 4.61E-152 | 0.31271772 | 0.413 | 0.147 | 1.14E-147 |
| MGLL    | 5.23E-152 | 0.54801402 | 0.645 | 0.434 | 1.29E-147 |
| CD59    | 2.46E-150 | 0.39485513 | 0.73  | 0.506 | 6.09E-146 |
| NPL     | 5.82E-150 | 0.39648843 | 0.741 | 0.521 | 1.44E-145 |
| SLC1A4  | 6.85E-150 | 0.2812863  | 0.313 | 0.078 | 1.70E-145 |
| SLC39A8 | 8.21E-150 | 0.3261761  | 0.265 | 0.047 | 2.03E-145 |
| GAS7    | 2.07E-149 | 0.28019018 | 0.455 | 0.18  | 5.12E-145 |
| BASP1   | 3.20E-149 | 0.4498648  | 0.694 | 0.387 | 7.92E-145 |
| HNRNPA3 | 4.16E-149 | 0.41462459 | 0.836 | 0.692 | 1.03E-144 |
| ADAM8   | 8.48E-149 | 0.26575869 | 0.27  | 0.05  | 2.10E-144 |
| NOP53   | 2.12E-148 | -0.3869951 | 0.553 | 0.746 | 5.25E-144 |
| CHST11  | 3.31E-148 | 0.35462713 | 0.732 | 0.492 | 8.20E-144 |

|           |           |            |       |       |           |
|-----------|-----------|------------|-------|-------|-----------|
| TNS3      | 8.35E-147 | 0.3764452  | 0.702 | 0.478 | 2.07E-142 |
| SLC11A1   | 1.28E-146 | -0.2777261 | 0.866 | 0.989 | 3.16E-142 |
| SPATS2L   | 2.78E-146 | -0.2769839 | 0.419 | 0.663 | 6.89E-142 |
| RHBDD2    | 2.86E-146 | -0.2509278 | 0.226 | 0.474 | 7.09E-142 |
| EMB       | 2.92E-146 | 0.28515857 | 0.275 | 0.056 | 7.23E-142 |
| PCBP1     | 4.43E-146 | 0.3021495  | 0.961 | 0.902 | 1.10E-141 |
| S1PR4     | 7.31E-146 | -0.2800082 | 0.261 | 0.513 | 1.81E-141 |
| C9orf16   | 1.06E-145 | -0.3711759 | 0.755 | 0.892 | 2.62E-141 |
| CD36      | 1.37E-145 | 0.81683451 | 0.671 | 0.439 | 3.39E-141 |
| LILRB5    | 1.96E-145 | 0.4205943  | 0.316 | 0.087 | 4.86E-141 |
| ANKH      | 2.05E-145 | 0.29153059 | 0.325 | 0.091 | 5.07E-141 |
| CXCL16    | 2.15E-145 | -0.2991931 | 0.887 | 0.952 | 5.32E-141 |
| OLFML2B   | 3.70E-144 | 0.25191812 | 0.273 | 0.054 | 9.17E-140 |
| SOCS3     | 2.74E-143 | 0.40681427 | 0.564 | 0.285 | 6.78E-139 |
| SPN       | 2.77E-143 | -0.38447   | 0.456 | 0.675 | 6.85E-139 |
| HCAR2     | 3.57E-143 | -0.2731935 | 0.095 | 0.315 | 8.83E-139 |
| TLR2      | 6.83E-143 | 0.40760641 | 0.45  | 0.2   | 1.69E-138 |
| TMEM176A  | 1.60E-142 | 0.33242016 | 0.282 | 0.064 | 3.96E-138 |
| FBP1      | 4.26E-142 | -0.5591846 | 0.903 | 0.965 | 1.05E-137 |
| PTMS      | 6.64E-142 | -0.3258019 | 0.608 | 0.789 | 1.64E-137 |
| BMP2K     | 1.66E-141 | 0.36024364 | 0.599 | 0.344 | 4.12E-137 |
| SLC1A3    | 3.35E-141 | 0.37763351 | 0.713 | 0.46  | 8.29E-137 |
| ACO1      | 2.30E-140 | -0.2992282 | 0.234 | 0.474 | 5.70E-136 |
| SLC2A3    | 3.03E-140 | 0.64607766 | 0.67  | 0.439 | 7.49E-136 |
| TRIM22    | 3.51E-139 | -0.2603875 | 0.326 | 0.579 | 8.69E-135 |
| SMPDL3A   | 6.94E-139 | 0.27253493 | 0.297 | 0.075 | 1.72E-134 |
| TMEM123   | 2.63E-137 | 0.34100832 | 0.708 | 0.47  | 6.50E-133 |
| ANXA2     | 3.44E-137 | 0.29362832 | 0.997 | 0.999 | 8.52E-133 |
| ZNF331    | 5.22E-137 | 0.57432503 | 0.693 | 0.465 | 1.29E-132 |
| RBMS1     | 6.88E-137 | 0.34954833 | 0.752 | 0.553 | 1.70E-132 |
| RAB11FIP1 | 1.43E-136 | -0.2789223 | 0.592 | 0.817 | 3.53E-132 |
| FCGR2B    | 1.94E-136 | 0.41568922 | 0.514 | 0.239 | 4.81E-132 |
| RHOQ      | 2.22E-136 | 0.34481251 | 0.814 | 0.66  | 5.51E-132 |
| FDFT1     | 4.41E-136 | -0.265543  | 0.161 | 0.391 | 1.09E-131 |
| GAA       | 2.43E-135 | -0.2819113 | 0.689 | 0.835 | 6.01E-131 |
| TIMP1     | 4.88E-135 | 1.21449777 | 0.799 | 0.707 | 1.21E-130 |
| CDC42EP3  | 1.08E-134 | -0.2804156 | 0.283 | 0.533 | 2.68E-130 |
| MGST3     | 1.21E-134 | -0.3055751 | 0.965 | 0.99  | 2.99E-130 |
| CHCHD10   | 1.94E-134 | -0.2782483 | 0.842 | 0.957 | 4.81E-130 |
| MEF2C     | 3.23E-134 | 0.3080295  | 0.309 | 0.087 | 8.01E-130 |
| FMN1      | 1.34E-133 | 0.29925435 | 0.445 | 0.189 | 3.33E-129 |
| ARL4A     | 1.50E-133 | -0.3220431 | 0.559 | 0.766 | 3.71E-129 |
| OSBPL8    | 2.34E-133 | 0.54777669 | 0.755 | 0.579 | 5.78E-129 |
| HSD17B11  | 5.19E-133 | -0.282165  | 0.441 | 0.664 | 1.28E-128 |
| NRP2      | 2.21E-132 | 0.31529328 | 0.654 | 0.385 | 5.48E-128 |

|          |           |            |       |       |           |
|----------|-----------|------------|-------|-------|-----------|
| RMDN3    | 3.08E-132 | -0.2960445 | 0.504 | 0.746 | 7.63E-128 |
| TNS1     | 3.88E-132 | 0.2730431  | 0.424 | 0.173 | 9.61E-128 |
| TPD52L2  | 9.31E-132 | 0.27220533 | 0.528 | 0.261 | 2.30E-127 |
| KLF6     | 1.34E-131 | 0.44837452 | 0.94  | 0.836 | 3.32E-127 |
| RHBDF2   | 1.41E-131 | 0.2503325  | 0.403 | 0.158 | 3.49E-127 |
| ANXA4    | 1.77E-131 | 0.36609586 | 0.825 | 0.714 | 4.38E-127 |
| PDCL     | 2.11E-131 | -0.2998836 | 0.254 | 0.48  | 5.23E-127 |
| ETHE1    | 3.99E-131 | -0.3080332 | 0.411 | 0.618 | 9.87E-127 |
| TMEM173  | 4.44E-131 | -0.3124937 | 0.224 | 0.453 | 1.10E-126 |
| EPS8     | 6.29E-131 | 0.25228345 | 0.28  | 0.069 | 1.56E-126 |
| MAF      | 2.87E-130 | 0.45778792 | 0.526 | 0.289 | 7.12E-126 |
| RPS3     | 3.92E-130 | -0.2528344 | 1     | 1     | 9.70E-126 |
| SRGAP1   | 5.38E-129 | 0.26961576 | 0.305 | 0.087 | 1.33E-124 |
| YWHAZ    | 9.28E-129 | 0.34413699 | 0.942 | 0.895 | 2.30E-124 |
| RHOBTB3  | 8.55E-128 | 0.25272735 | 0.267 | 0.062 | 2.12E-123 |
| GLUL     | 1.05E-127 | -0.2813027 | 0.969 | 0.998 | 2.60E-123 |
| JARID2   | 1.25E-127 | 0.29544121 | 0.426 | 0.183 | 3.09E-123 |
| AP1B1    | 3.62E-127 | 0.34312666 | 0.541 | 0.296 | 8.96E-123 |
| GLIPR1   | 3.68E-127 | 0.35896154 | 0.769 | 0.57  | 9.10E-123 |
| EML4     | 4.61E-127 | -0.3136847 | 0.637 | 0.789 | 1.14E-122 |
| PRCP     | 1.40E-126 | 0.28922298 | 0.546 | 0.283 | 3.45E-122 |
| CD300A   | 1.77E-126 | 0.27991474 | 0.427 | 0.183 | 4.37E-122 |
| AXL      | 2.44E-126 | -0.2728952 | 0.178 | 0.419 | 6.05E-122 |
| LAMP1    | 7.00E-126 | 0.30302548 | 0.973 | 0.986 | 1.73E-121 |
| DNAJA1   | 7.83E-126 | -0.2807069 | 0.86  | 0.933 | 1.94E-121 |
| HIF1A    | 3.31E-125 | 0.33004327 | 0.674 | 0.395 | 8.20E-121 |
| SPI1     | 3.61E-125 | -0.2600877 | 0.914 | 0.956 | 8.93E-121 |
| STXBP2   | 4.05E-125 | -0.3228736 | 0.634 | 0.802 | 1.00E-120 |
| FPR2     | 7.96E-125 | -0.304729  | 0.138 | 0.356 | 1.97E-120 |
| GCA      | 9.43E-125 | -0.3668352 | 0.532 | 0.705 | 2.34E-120 |
| SLC35E3  | 1.82E-124 | -0.297648  | 0.357 | 0.581 | 4.52E-120 |
| CAPZB    | 2.26E-124 | 0.29755154 | 0.925 | 0.838 | 5.59E-120 |
| NUCB1    | 7.47E-124 | -0.2598167 | 0.706 | 0.861 | 1.85E-119 |
| RPS2     | 1.28E-122 | -0.297439  | 1     | 1     | 3.16E-118 |
| TREM2    | 2.77E-122 | 0.47265872 | 0.809 | 0.68  | 6.87E-118 |
| HLA-DQA2 | 6.68E-122 | -0.6431955 | 0.256 | 0.483 | 1.65E-117 |
| WIPF1    | 1.81E-121 | 0.31576621 | 0.716 | 0.498 | 4.49E-117 |
| ATP6AP2  | 4.11E-121 | 0.32690895 | 0.938 | 0.856 | 1.02E-116 |
| PDIA3    | 5.70E-121 | 0.36002035 | 0.881 | 0.773 | 1.41E-116 |
| EIF1     | 6.74E-121 | -0.4663522 | 1     | 1     | 1.67E-116 |
| CXXC5    | 8.16E-121 | 0.30410954 | 0.506 | 0.263 | 2.02E-116 |
| MIS18BP1 | 1.34E-120 | -0.2577302 | 0.475 | 0.706 | 3.33E-116 |
| DOK2     | 3.01E-120 | -0.2968156 | 0.608 | 0.759 | 7.46E-116 |
| IFIT2    | 5.10E-120 | -0.2883099 | 0.148 | 0.368 | 1.26E-115 |
| SCCPDH   | 8.00E-120 | -0.2643514 | 0.562 | 0.762 | 1.98E-115 |



|             |           |            |       |       |           |
|-------------|-----------|------------|-------|-------|-----------|
| TSPAN4      | 1.03E-119 | 0.41184436 | 0.626 | 0.424 | 2.55E-115 |
| MACF1       | 1.66E-119 | 0.31522903 | 0.5   | 0.254 | 4.12E-115 |
| MTPN        | 3.16E-119 | -0.264723  | 0.863 | 0.914 | 7.82E-115 |
| MMP14       | 1.04E-118 | 0.26533907 | 0.379 | 0.152 | 2.56E-114 |
| DNPH1       | 1.07E-118 | 0.29249919 | 0.538 | 0.293 | 2.66E-114 |
| TLN1        | 1.82E-118 | 0.31463601 | 0.831 | 0.669 | 4.51E-114 |
| REL         | 2.87E-118 | 0.45141617 | 0.771 | 0.616 | 7.11E-114 |
| SLC20A1     | 3.01E-118 | 0.3165511  | 0.516 | 0.266 | 7.45E-114 |
| MYO1E       | 1.54E-117 | 0.25137327 | 0.397 | 0.168 | 3.82E-113 |
| BSG         | 8.04E-117 | -0.3271433 | 0.823 | 0.893 | 1.99E-112 |
| CAMK1       | 1.45E-116 | 0.30014521 | 0.352 | 0.131 | 3.58E-112 |
| FAM49B      | 3.64E-116 | 0.30954946 | 0.841 | 0.704 | 9.01E-112 |
| EPB41L4A-A' | 3.80E-116 | -0.3605221 | 0.185 | 0.389 | 9.41E-112 |
| MRC1        | 6.97E-116 | -0.3625906 | 0.887 | 0.953 | 1.73E-111 |
| SMCO4       | 7.30E-116 | -0.2630698 | 0.548 | 0.719 | 1.81E-111 |
| ZNF385A     | 8.91E-116 | 0.28260671 | 0.508 | 0.267 | 2.21E-111 |
| C1orf54     | 1.47E-115 | 0.26068079 | 0.317 | 0.107 | 3.64E-111 |
| MFSD12      | 7.07E-115 | 0.49368983 | 0.772 | 0.622 | 1.75E-110 |
| POLR2L      | 8.86E-115 | 0.31701485 | 0.892 | 0.761 | 2.19E-110 |
| RALA        | 1.07E-114 | 0.26742374 | 0.759 | 0.539 | 2.65E-110 |
| SWAP70      | 4.36E-114 | 0.2729023  | 0.533 | 0.286 | 1.08E-109 |
| PALLD       | 1.30E-113 | 0.27695217 | 0.295 | 0.095 | 3.22E-109 |
| ITGB2       | 1.78E-113 | 0.3954612  | 0.955 | 0.924 | 4.41E-109 |
| DBI         | 2.07E-113 | 0.31573748 | 0.983 | 0.983 | 5.12E-109 |
| OPN3        | 2.73E-113 | -0.2618671 | 0.467 | 0.674 | 6.76E-109 |
| ST14        | 6.30E-113 | 0.28212435 | 0.551 | 0.313 | 1.56E-108 |
| ABL2        | 7.55E-113 | 0.44505739 | 0.633 | 0.421 | 1.87E-108 |
| NR1H3       | 1.67E-112 | 0.4645325  | 0.515 | 0.3   | 4.14E-108 |
| CMTM6       | 5.60E-112 | 0.32279321 | 0.862 | 0.703 | 1.39E-107 |
| SLC27A3     | 1.29E-111 | -0.2697129 | 0.342 | 0.552 | 3.20E-107 |
| DEFB1       | 1.43E-111 | -0.3418071 | 0.108 | 0.301 | 3.54E-107 |
| GLMP        | 6.23E-110 | 0.28839663 | 0.583 | 0.351 | 1.54E-105 |
| MS4A6A      | 8.20E-110 | 0.78925809 | 0.604 | 0.438 | 2.03E-105 |
| CD14        | 2.18E-108 | 0.68253056 | 0.821 | 0.747 | 5.39E-104 |
| GM2A        | 1.32E-107 | 0.63119824 | 0.793 | 0.733 | 3.26E-103 |
| HERPUD1     | 1.58E-107 | 0.56595298 | 0.77  | 0.604 | 3.91E-103 |
| ALAS1       | 2.09E-107 | -0.2779308 | 0.312 | 0.515 | 5.18E-103 |
| CTSL        | 3.81E-107 | 0.5928278  | 0.973 | 0.981 | 9.43E-103 |
| GNB4        | 1.47E-106 | 0.32245957 | 0.743 | 0.573 | 3.64E-102 |
| SDS         | 2.81E-106 | 0.44888977 | 0.318 | 0.114 | 6.97E-102 |
| EIF4G2      | 6.66E-106 | 0.30290362 | 0.941 | 0.885 | 1.65E-101 |
| CFLAR       | 2.31E-105 | 0.35002471 | 0.696 | 0.495 | 5.71E-101 |
| KIF1B       | 3.76E-105 | 0.26694759 | 0.53  | 0.298 | 9.31E-101 |
| PPT1        | 5.00E-105 | 0.27357784 | 0.924 | 0.863 | 1.24E-100 |
| ZEB2        | 5.67E-105 | 0.36704086 | 0.931 | 0.862 | 1.40E-100 |

|          |           |            |       |       |           |
|----------|-----------|------------|-------|-------|-----------|
| CD109    | 7.61E-105 | 0.29809532 | 0.459 | 0.24  | 1.88E-100 |
| CXCL3    | 1.05E-104 | -0.3524556 | 0.363 | 0.604 | 2.59E-100 |
| VEGFA    | 3.19E-104 | 0.41109532 | 0.305 | 0.111 | 7.89E-100 |
| TM4SF19  | 5.54E-104 | 0.51283241 | 0.383 | 0.174 | 1.37E-99  |
| IFIT3    | 3.17E-103 | -0.2746669 | 0.288 | 0.509 | 7.85E-99  |
| JUNB     | 4.27E-103 | 0.41810882 | 0.949 | 0.891 | 1.06E-98  |
| ADAP2    | 6.22E-103 | 0.33042059 | 0.609 | 0.399 | 1.54E-98  |
| CCL23    | 8.86E-103 | -0.3312636 | 0.181 | 0.381 | 2.19E-98  |
| TUBA1A   | 7.51E-102 | 0.35992032 | 0.633 | 0.407 | 1.86E-97  |
| MGAT1    | 9.92E-102 | 0.25347156 | 0.945 | 0.887 | 2.45E-97  |
| STOM     | 1.72E-101 | -0.3372071 | 0.525 | 0.679 | 4.26E-97  |
| RAB1A    | 2.18E-101 | 0.28744108 | 0.849 | 0.74  | 5.40E-97  |
| SCGB1A1  | 3.32E-101 | 0.32319009 | 0.575 | 0.354 | 8.22E-97  |
| FXYS5    | 5.11E-101 | 0.26152251 | 0.899 | 0.8   | 1.26E-96  |
| IER3     | 6.73E-101 | 0.48711178 | 0.467 | 0.237 | 1.66E-96  |
| CREM     | 2.29E-100 | 0.37162141 | 0.52  | 0.302 | 5.66E-96  |
| ZFP36L2  | 5.15E-100 | 0.40512863 | 0.887 | 0.809 | 1.28E-95  |
| TCN2     | 6.62E-100 | 0.33993956 | 0.466 | 0.253 | 1.64E-95  |
| METRNL   | 4.99E-99  | 0.31325451 | 0.773 | 0.586 | 1.24E-94  |
| CXCL5    | 6.48E-99  | -0.6207681 | 0.095 | 0.273 | 1.60E-94  |
| BCAP31   | 1.07E-98  | 0.30711347 | 0.949 | 0.934 | 2.66E-94  |
| CD83     | 1.13E-98  | 0.38589261 | 0.805 | 0.667 | 2.79E-94  |
| SLC29A3  | 1.57E-98  | 0.30613117 | 0.502 | 0.286 | 3.88E-94  |
| FTL      | 2.36E-98  | -0.2768128 | 1     | 1     | 5.85E-94  |
| SPARC    | 3.51E-96  | 0.50897305 | 0.363 | 0.174 | 8.69E-92  |
| NAIP     | 3.77E-96  | 0.25926813 | 0.364 | 0.164 | 9.34E-92  |
| HMGA1    | 4.96E-96  | 0.40561868 | 0.634 | 0.433 | 1.23E-91  |
| PAPSS2   | 7.51E-96  | 0.2782779  | 0.482 | 0.259 | 1.86E-91  |
| NINJ1    | 2.34E-95  | 0.25997367 | 0.472 | 0.24  | 5.80E-91  |
| ITGB1BP1 | 8.98E-95  | 0.39140384 | 0.628 | 0.457 | 2.22E-90  |
| CALR     | 7.13E-94  | 0.3643496  | 0.955 | 0.932 | 1.77E-89  |
| TRPS1    | 8.92E-94  | 0.25277691 | 0.395 | 0.188 | 2.21E-89  |
| ADM      | 9.53E-93  | 0.37166766 | 0.319 | 0.134 | 2.36E-88  |
| MRAS     | 3.46E-92  | 0.31944648 | 0.547 | 0.338 | 8.56E-88  |
| TGFBR1   | 4.16E-92  | 0.27000572 | 0.551 | 0.339 | 1.03E-87  |
| ZMIZ1    | 4.49E-92  | 0.25478407 | 0.567 | 0.35  | 1.11E-87  |
| GBA      | 9.16E-92  | 0.25159651 | 0.572 | 0.357 | 2.27E-87  |
| TPI1     | 1.35E-91  | 0.25372281 | 0.961 | 0.937 | 3.35E-87  |
| HLA-DRB5 | 3.28E-91  | -0.4979708 | 0.312 | 0.53  | 8.13E-87  |
| FERMT3   | 9.97E-91  | 0.29784004 | 0.852 | 0.754 | 2.47E-86  |
| RAB20    | 1.13E-90  | 0.26941888 | 0.712 | 0.517 | 2.80E-86  |
| RBM47    | 1.40E-90  | 0.31912962 | 0.798 | 0.651 | 3.46E-86  |
| PARVB    | 5.33E-90  | 0.2557972  | 0.647 | 0.448 | 1.32E-85  |
| ASAP1    | 5.78E-90  | 0.29705779 | 0.691 | 0.521 | 1.43E-85  |
| HNRNPU   | 7.37E-90  | 0.36245491 | 0.926 | 0.862 | 1.83E-85  |

|         |          |            |       |       |          |
|---------|----------|------------|-------|-------|----------|
| SPRED1  | 5.00E-89 | 0.34081762 | 0.507 | 0.306 | 1.24E-84 |
| HSD3B7  | 1.19E-88 | 0.3168003  | 0.615 | 0.437 | 2.94E-84 |
| CD82    | 3.37E-88 | 0.28146502 | 0.474 | 0.268 | 8.34E-84 |
| LST1    | 3.45E-88 | -0.328844  | 0.737 | 0.824 | 8.53E-84 |
| VMO1    | 7.54E-88 | -0.2765073 | 0.201 | 0.392 | 1.87E-83 |
| SCGB3A1 | 2.43E-87 | 0.34133785 | 0.682 | 0.482 | 6.02E-83 |
| PECAM1  | 2.85E-87 | -0.2959786 | 0.573 | 0.702 | 7.05E-83 |
| PLD3    | 3.69E-87 | 0.47718954 | 0.818 | 0.765 | 9.13E-83 |
| AKR1B1  | 5.44E-87 | -0.2707452 | 0.524 | 0.707 | 1.35E-82 |
| SLC25A6 | 1.23E-86 | -0.2874449 | 0.944 | 0.962 | 3.03E-82 |
| RND3    | 3.93E-86 | -0.4604683 | 0.115 | 0.28  | 9.72E-82 |
| SPAG9   | 8.35E-86 | 0.32725586 | 0.591 | 0.393 | 2.07E-81 |
| RAB31   | 1.18E-85 | 0.28538809 | 0.869 | 0.745 | 2.91E-81 |
| NABP1   | 1.96E-85 | 0.34653883 | 0.711 | 0.537 | 4.84E-81 |
| PGAM1   | 4.80E-85 | 0.27012461 | 0.845 | 0.759 | 1.19E-80 |
| HCST    | 4.84E-85 | 0.37267693 | 0.853 | 0.751 | 1.20E-80 |
| EZR     | 2.80E-84 | 0.31742068 | 0.633 | 0.434 | 6.93E-80 |
| EIF1B   | 3.29E-82 | -0.3004439 | 0.605 | 0.736 | 8.15E-78 |
| SLC44A1 | 5.84E-82 | 0.25402527 | 0.389 | 0.194 | 1.45E-77 |
| DAZAP2  | 1.14E-81 | 0.30124927 | 0.713 | 0.565 | 2.83E-77 |
| TXNIP   | 1.17E-81 | -0.3657351 | 0.916 | 0.909 | 2.89E-77 |
| TGM2    | 2.03E-81 | -0.354185  | 0.385 | 0.565 | 5.02E-77 |
| TCIRG1  | 3.36E-81 | 0.28495168 | 0.87  | 0.801 | 8.32E-77 |
| NRP1    | 1.32E-80 | 0.33010627 | 0.587 | 0.409 | 3.27E-76 |
| ZFP36   | 6.32E-80 | 0.47734758 | 0.617 | 0.472 | 1.56E-75 |
| XIST    | 1.16E-78 | 0.34632577 | 0.633 | 0.407 | 2.88E-74 |
| GAPDH   | 2.66E-78 | 0.27061521 | 0.999 | 0.999 | 6.59E-74 |
| COLEC12 | 6.84E-78 | -0.268934  | 0.37  | 0.559 | 1.69E-73 |
| INSIG1  | 1.68E-77 | 0.34047028 | 0.322 | 0.148 | 4.15E-73 |
| SNHG7   | 1.90E-77 | -0.3356653 | 0.292 | 0.455 | 4.70E-73 |
| MPEG1   | 5.12E-77 | 0.29914793 | 0.334 | 0.164 | 1.27E-72 |
| JAK1    | 2.21E-76 | 0.27703515 | 0.699 | 0.537 | 5.48E-72 |
| ABHD12  | 4.37E-76 | 0.25528356 | 0.687 | 0.526 | 1.08E-71 |
| AP2A2   | 4.69E-76 | 0.27433364 | 0.439 | 0.259 | 1.16E-71 |
| IL17RA  | 6.06E-76 | 0.25741192 | 0.565 | 0.378 | 1.50E-71 |
| ATP6V1A | 1.75E-75 | 0.3152098  | 0.751 | 0.619 | 4.33E-71 |
| TIMM8B  | 2.83E-75 | 0.26429301 | 0.805 | 0.694 | 7.02E-71 |
| SEC61G  | 5.25E-75 | 0.29803696 | 0.861 | 0.802 | 1.30E-70 |
| ZFAS1   | 6.42E-75 | -0.4872888 | 0.897 | 0.906 | 1.59E-70 |
| ATOX1   | 7.88E-75 | 0.28758701 | 0.903 | 0.874 | 1.95E-70 |
| TPM4    | 1.16E-74 | 0.25991918 | 0.892 | 0.799 | 2.87E-70 |
| SFTPC   | 2.46E-74 | 0.30669875 | 0.556 | 0.36  | 6.10E-70 |
| ARPC4   | 3.92E-74 | 0.27677339 | 0.838 | 0.735 | 9.71E-70 |
| FAIM    | 1.62E-71 | 0.2836928  | 0.404 | 0.226 | 4.00E-67 |
| TUBA1C  | 7.30E-71 | 0.28967952 | 0.806 | 0.712 | 1.81E-66 |

|           |          |            |       |       |          |
|-----------|----------|------------|-------|-------|----------|
| TAF1D     | 7.59E-71 | -0.3514839 | 0.514 | 0.646 | 1.88E-66 |
| IFITM3    | 4.48E-70 | 0.35805441 | 0.431 | 0.252 | 1.11E-65 |
| SLC3A2    | 1.19E-69 | -0.2944478 | 0.841 | 0.919 | 2.94E-65 |
| ARHGDI1A  | 3.39E-69 | 0.26603728 | 0.832 | 0.742 | 8.40E-65 |
| CLTC      | 5.00E-69 | 0.27200755 | 0.802 | 0.687 | 1.24E-64 |
| ARL4C     | 1.07E-68 | 0.33547794 | 0.342 | 0.172 | 2.65E-64 |
| SNX9      | 1.38E-68 | 0.26485213 | 0.54  | 0.357 | 3.41E-64 |
| NUPR1     | 3.98E-68 | -0.2597537 | 0.518 | 0.726 | 9.85E-64 |
| GPR34     | 5.38E-68 | 0.38942722 | 0.393 | 0.231 | 1.33E-63 |
| SYNCRIP   | 1.26E-67 | 0.25037618 | 0.72  | 0.573 | 3.11E-63 |
| PLAU      | 1.73E-67 | 0.27982916 | 0.403 | 0.232 | 4.29E-63 |
| RAB32     | 2.22E-67 | 0.25439191 | 0.78  | 0.657 | 5.49E-63 |
| MIR3945HG | 3.59E-67 | -0.2684138 | 0.269 | 0.436 | 8.90E-63 |
| CSTB      | 1.32E-66 | 0.29524887 | 0.996 | 1     | 3.27E-62 |
| PDXK      | 1.53E-66 | 0.2535767  | 0.931 | 0.905 | 3.80E-62 |
| FOS       | 1.91E-66 | 0.42536018 | 0.945 | 0.908 | 4.73E-62 |
| CHMP1B    | 2.51E-66 | 0.33402911 | 0.561 | 0.39  | 6.21E-62 |
| DUSP1     | 5.93E-66 | 0.34660755 | 0.971 | 0.979 | 1.47E-61 |
| KLF10     | 1.67E-65 | 0.26466056 | 0.331 | 0.165 | 4.13E-61 |
| ATP1B3    | 2.04E-65 | 0.25579829 | 0.961 | 0.932 | 5.06E-61 |
| HS3ST2    | 7.77E-65 | 0.34831697 | 0.284 | 0.128 | 1.92E-60 |
| LYZ       | 6.28E-64 | -0.2893285 | 0.987 | 0.997 | 1.55E-59 |
| ASPH      | 1.66E-63 | 0.25501714 | 0.573 | 0.402 | 4.12E-59 |
| DDX3X     | 3.20E-63 | 0.27004502 | 0.829 | 0.716 | 7.92E-59 |
| IFNGR2    | 1.86E-61 | 0.26833059 | 0.704 | 0.568 | 4.61E-57 |
| MAT2A     | 5.81E-61 | 0.28227991 | 0.599 | 0.443 | 1.44E-56 |
| C5AR1     | 1.69E-60 | 0.28642518 | 0.885 | 0.813 | 4.19E-56 |
| FCGR3A    | 1.73E-60 | -0.2523943 | 0.659 | 0.805 | 4.28E-56 |
| NR4A3     | 7.37E-60 | 0.31705027 | 0.485 | 0.318 | 1.83E-55 |
| DPYSL2    | 2.07E-59 | 0.25573135 | 0.689 | 0.533 | 5.12E-55 |
| RGS10     | 4.26E-59 | 0.25072353 | 0.831 | 0.718 | 1.06E-54 |
| HAMP      | 3.66E-58 | 0.44709295 | 0.26  | 0.117 | 9.07E-54 |
| LIPA      | 1.39E-57 | 0.39898797 | 0.909 | 0.898 | 3.45E-53 |
| CAPG      | 1.25E-56 | 0.32196437 | 0.975 | 0.992 | 3.09E-52 |
| GNAQ      | 2.60E-56 | 0.26159525 | 0.684 | 0.561 | 6.43E-52 |
| SNHG12    | 1.53E-55 | -0.4457479 | 0.32  | 0.444 | 3.79E-51 |
| TGFBI     | 1.83E-55 | 0.52629263 | 0.742 | 0.73  | 4.52E-51 |
| FOSL2     | 6.72E-54 | 0.26315187 | 0.498 | 0.345 | 1.66E-49 |
| NTAN1     | 1.12E-52 | 0.29180784 | 0.695 | 0.581 | 2.78E-48 |
| SCD       | 2.20E-52 | -0.4079455 | 0.525 | 0.654 | 5.44E-48 |
| CD44      | 2.51E-52 | 0.30691867 | 0.98  | 0.989 | 6.21E-48 |
| SDSL      | 1.05E-51 | 0.26370224 | 0.612 | 0.46  | 2.60E-47 |
| FN1       | 1.52E-50 | -0.7483984 | 0.612 | 0.647 | 3.76E-46 |
| TNFAIP3   | 2.33E-48 | 0.38914101 | 0.356 | 0.217 | 5.77E-44 |
| IQGAP2    | 7.28E-48 | 0.26431207 | 0.769 | 0.712 | 1.80E-43 |

|          |            |            |       |       |            |
|----------|------------|------------|-------|-------|------------|
| ATF3     | 3.07E-47   | 0.29236814 | 0.698 | 0.546 | 7.60E-43   |
| CXCL8    | 1.05E-45   | 0.34511256 | 0.32  | 0.176 | 2.60E-41   |
| ANPEP    | 1.42E-44   | 0.28964882 | 0.605 | 0.456 | 3.52E-40   |
| TNFSF13B | 2.02E-44   | 0.26551    | 0.607 | 0.497 | 4.99E-40   |
| IL1RN    | 9.15E-42   | 0.8762575  | 0.417 | 0.298 | 2.26E-37   |
| NPM1     | 7.46E-41   | -0.2586651 | 0.989 | 0.992 | 1.85E-36   |
| LSP1     | 1.11E-40   | 0.3002473  | 0.576 | 0.468 | 2.76E-36   |
| SLC25A37 | 1.43E-40   | 0.26844905 | 0.29  | 0.169 | 3.55E-36   |
| NFKBIA   | 2.30E-40   | 0.30627855 | 0.874 | 0.787 | 5.69E-36   |
| PLAUR    | 5.51E-39   | 0.25682569 | 0.917 | 0.932 | 1.36E-34   |
| ETS2     | 1.16E-38   | 0.45167616 | 0.575 | 0.496 | 2.86E-34   |
| DSE      | 2.62E-38   | 0.25199387 | 0.584 | 0.472 | 6.48E-34   |
| MTRNR2L8 | 3.93E-38   | 0.37517982 | 0.57  | 0.453 | 9.72E-34   |
| CSF1     | 1.11E-37   | 0.32772943 | 0.335 | 0.211 | 2.76E-33   |
| CXCR4    | 3.31E-34   | 0.32059887 | 0.628 | 0.506 | 8.18E-30   |
| SDF2L1   | 4.78E-33   | 0.26042785 | 0.604 | 0.523 | 1.18E-28   |
| AQP9     | 7.37E-33   | 0.25017077 | 0.628 | 0.536 | 1.82E-28   |
| RBPJ     | 1.32E-31   | 0.26582548 | 0.883 | 0.856 | 3.26E-27   |
| CRIP1    | 4.48E-31   | -0.3064542 | 0.645 | 0.694 | 1.11E-26   |
| AREG     | 3.26E-25   | 0.42793691 | 0.527 | 0.42  | 8.08E-21   |
| PIIF     | 6.80E-25   | 0.25631041 | 0.407 | 0.306 | 1.68E-20   |
| APOE     | 1.84E-24   | 0.63757437 | 0.895 | 0.964 | 4.57E-20   |
| PHLDA1   | 2.25E-24   | 0.29151157 | 0.514 | 0.431 | 5.58E-20   |
| LMNA     | 1.19E-21   | 0.26439861 | 0.904 | 0.885 | 2.95E-17   |
| SLC16A10 | 1.48E-20   | 0.26070558 | 0.539 | 0.465 | 3.66E-16   |
| MMP19    | 1.20E-17   | 0.28147982 | 0.609 | 0.548 | 2.97E-13   |
| GDF15    | 3.88E-17   | -0.5192402 | 0.282 | 0.344 | 9.59E-13   |
| NAMPT    | 2.13E-16   | 0.35759665 | 0.805 | 0.813 | 5.27E-12   |
| S100A9   | 9.32E-16   | 0.51463832 | 0.894 | 0.941 | 2.31E-11   |
| THBD     | 7.11E-15   | 0.30894108 | 0.415 | 0.351 | 1.76E-10   |
| S100A8   | 8.47E-13   | 0.54333062 | 0.562 | 0.518 | 2.10E-08   |
| RGCC     | 3.30E-11   | 0.43416051 | 0.854 | 0.891 | 8.16E-07   |
| CXCL2    | 1.11E-07   | 0.28442009 | 0.37  | 0.327 | 0.00274111 |
| FABP5    | 0.00052074 | 0.26922846 | 0.966 | 0.99  | 1          |
| FABP3    | 0.00061457 | -0.4252922 | 0.381 | 0.371 | 1          |
| FDX1     | 0.00203286 | 0.30567049 | 0.707 | 0.733 | 1          |
| CIR1     | 0.05461524 | 0.38369684 | 0.521 | 0.59  | 1          |
