# Supplementary material
Source: PubMed Central journal article supplement (PMC9771864)
Supplement: NIHMS1819536-supplement-Table_S5.pdf [file NIHMS1819536-supplement-Table_S5.pdf]

**Table S5. Upstream regulators of SPP1 macrophages\***

| Upstream Regulator | Molecule Type           | Predicted Activation State | Activation z-score | p-value of overlap |
|--------------------|-------------------------|----------------------------|--------------------|--------------------|
| lipopolysaccharide | chemical drug           | Activated                  | 5.504              | 1.12E-79           |
| TNF                | cytokine                | Activated                  | 3.837              | 1.12E-50           |
| TGFB1              | growth factor           | Activated                  | 2.651              | 1.43E-45           |
| CD40LG             | cytokine                | Activated                  | 3.102              | 2.08E-39           |
| IL33               | cytokine                | Activated                  | 3.284              | 3.22E-37           |
| IL1B               | cytokine                | Activated                  | 3.746              | 2.50E-36           |
| IL2                | cytokine                | Activated                  | 2.675              | 1.70E-27           |
| IL6                | cytokine                | Activated                  | 3.157              | 6.62E-27           |
| TNFSF11            | cytokine                | Activated                  | 2.426              | 1.18E-25           |
| IL15               | cytokine                | Activated                  | 2.802              | 3.34E-24           |
| IL3                | cytokine                | Activated                  | 2.674              | 3.47E-22           |
| IL5                | cytokine                | Activated                  | 3.466              | 7.33E-22           |
| EGF                | growth factor           | Activated                  | 3.151              | 9.86E-22           |
| VEGFA              | growth factor           | Activated                  | 2.769              | 2.93E-19           |
| HGF                | growth factor           | Activated                  | 4.814              | 1.76E-18           |
| IGF1               | growth factor           | Activated                  | 2.634              | 1.56E-17           |
| PRL                | cytokine                | Activated                  | 3.323              | 2.96E-17           |
| AGT                | growth factor           | Activated                  | 2.013              | 8.18E-17           |
| CCL5               | cytokine                | Activated                  | 3.113              | 6.26E-16           |
| IL17A              | cytokine                | Activated                  | 3.038              | 1.07E-14           |
| TFEB               | transcription regulator | Activated                  | 3.012              | 3.97E-14           |
| FGF2               | growth factor           | Activated                  | 2.471              | 6.50E-14           |
| CNTF               | cytokine                | Activated                  | 2.173              | 2.01E-13           |
| IL1A               | cytokine                | Activated                  | 4.093              | 1.81E-11           |
| PF4                | cytokine                | Activated                  | 3.264              | 2.33E-11           |
| IL11               | cytokine                | Activated                  | 2.085              | 3.11E-10           |
| C5                 | cytokine                | Activated                  | 2.889              | 1.32E-09           |
| TGFA               | growth factor           | Activated                  | 2.282              | 1.36E-09           |
| ANGPT2             | growth factor           | Activated                  | 2.204              | 4.22E-09           |
| TLR7               | transmembrane recept    | Activated                  | 3.929              | 4.67E-09           |
| TLR9               | transmembrane recept    | Activated                  | 3.377              | 6.17E-08           |
| SPP1               | cytokine                | Activated                  | 2.031              | 5.92E-06           |
| NGF                | growth factor           | Activated                  | 2.424              | 9.92E-06           |
| TNFSF12            | cytokine                | Activated                  | 2.994              | 5.68E-05           |
| AIMP1              | cytokine                | Activated                  | 2.207              | 9.19E-05           |
| GDF2               | growth factor           | Activated                  | 2.95               | 1.01E-04           |
| THPO               | cytokine                | Activated                  | 2.037              | 1.63E-04           |
| BMP6               | growth factor           | Activated                  | 2.118              | 1.79E-04           |
| IL22               | cytokine                | Activated                  | 2.229              | 2.67E-04           |
| IL12B              | cytokine                | Activated                  | 2.008              | 8.07E-04           |
| BTC                | growth factor           | Activated                  | 2                  | 1.24E-03           |
| IL36G              | cytokine                | Activated                  | 2.176              | 1.49E-03           |
| IL17F              | cytokine                | Activated                  | 2.41               | 2.52E-03           |
| Ccl2               | cytokine                | Activated                  | 2.611              | 3.35E-03           |
| IL36A              | cytokine                | Activated                  | 2.234              | 5.73E-03           |
| IFNE               | cytokine                | Activated                  | 2.219              | 1.37E-02           |
| LTA                | cytokine                | Activated                  | 2.219              | 4.09E-02           |
| JAG1               | growth factor           | Activated                  | 2.2                | 9.60E-02           |

\* IPA analysis of upstream regulators ranked by z-score and filtered by cytokine or growth factor as Molecule type, and by Activated as Predicted Activation state. Also included are TLRs and TFEB

**LPS-regulated gene showing increased expression by SPP1 macrophages**

| ID     | Genes in dataset   | Prediction (based on measurement) |                |                   |
|--------|--------------------|-----------------------------------|----------------|-------------------|
|        |                    | direction)                        | Expr Log Ratio | Findings          |
| SPP1   | SPP1               | Activated                         | 4.66           | Upregulates (7)   |
| CCL2   | CCL2               | Activated                         | 4.341          | Upregulates (97)  |
| TIMP1  | TIMP1              | Activated                         | 2.213          | Upregulates (11)  |
| CCL3   | CCL3               | Activated                         | 1.573          | Upregulates (45)  |
| CCL7   | CCL7               | Activated                         | 1.568          | Upregulates (9)   |
| CTSL   | CTSL               | Activated                         | 1.55           | Upregulates (1)   |
| G0S2   | G0S2               | Activated                         | 1.481          | Upregulates (4)   |
| PLA2G7 | PLA2G7             | Activated                         | 1.337          | Upregulates (10)  |
| S100A8 | S100A8             | Activated                         | 1.298          | Upregulates (54)  |
| CXCL8  | CXCL8              | Activated                         | 1.277          | Upregulates (288) |
| IL1RN  | IL1RN              | Activated                         | 1.104          | Upregulates (71)  |
| S100A9 | S100A9             | Activated                         | 1.083          | Upregulates (7)   |
| MARCKS | MARCKS             | Activated                         | 1.08           | Upregulates (6)   |
| SOD2   | SOD2               | Activated                         | 1.06           | Upregulates (19)  |
| GPR183 | GPR183             | Activated                         | 1.06           | Upregulates (2)   |
| CTSB   | CTSB               | Activated                         | 1.01           | Upregulates (7)   |
| SLC2A3 | SLC2A3             | Affected                          | 0.941          | Regulates (1)     |
| CALM3  | CALM1 (includes of | Inhibited                         | 0.94           | Downregulates (1) |
| CXCL2  | CXCL2              | Activated                         | 0.933          | Upregulates (123) |
| LGALS1 | LGALS1             | Activated                         | 0.922          | Upregulates (1)   |
| RGS1   | RGS1               | Activated                         | 0.897          | Upregulates (12)  |
| CD36   | CD36               | Inhibited                         | 0.883          | Downregulates (4) |
| ISG15  | ISG15              | Activated                         | 0.872          | Upregulates (16)  |
| PLAUR  | PLAUR              | Activated                         | 0.866          | Upregulates (6)   |
| LILRB4 | LILRB4             | Activated                         | 0.84           | Upregulates (4)   |
| CD48   | CD48               | Activated                         | 0.832          | Upregulates (1)   |
| TYMP   | TYMP               | Affected                          | 0.816          | Regulates (1)     |
| IER3   | IER3               | Activated                         | 0.8            | Upregulates (4)   |
| AREG   | AREG               | Activated                         | 0.799          | Upregulates (4)   |
| LIMS1  | LIMS1              | Activated                         | 0.776          | Upregulates (2)   |
| HAMP   | HAMP               | Activated                         | 0.771          | Upregulates (1)   |
| RGS2   | RGS2               | Inhibited                         | 0.756          | Downregulates (7) |
| CD63   | CD63               | Activated                         | 0.749          | Upregulates (1)   |
| CD14   | CD14               | Activated                         | 0.747          | Upregulates (49)  |
| HIF1A  | HIF1A              | Activated                         | 0.737          | Upregulates (38)  |
| HM13   | HM13               | Activated                         | 0.717          | Upregulates (2)   |
| MIF    | MIF                | Activated                         | 0.698          | Upregulates (6)   |
| CREM   | CREM               | Activated                         | 0.694          | Upregulates (4)   |
| PDIA6  | PDIA6              | Activated                         | 0.675          | Upregulates (1)   |
| EREG   | EREG               | Activated                         | 0.669          | Upregulates (5)   |
| SOCS3  | SOCS3              | Activated                         | 0.644          | Upregulates (57)  |
| CSTB   | CSTB               | Activated                         | 0.643          | Upregulates (1)   |
| CORO1A | CORO1A             | Inhibited                         | 0.638          | Downregulates (1) |
| HMGA1  | HMGA1              | Activated                         | 0.637          | Upregulates (4)   |
| ENO1   | ENO1               | Activated                         | 0.63           | Upregulates (4)   |
| CLEC5A | CLEC5A             | Activated                         | 0.63           | Upregulates (2)   |
| DUSP2  | DUSP2              | Activated                         | 0.617          | Upregulates (6)   |
| FABP5  | FABP5              | Activated                         | 0.605          | Upregulates (2)   |
| HSPA5  | HSPA5              | Activated                         | 0.596          | Upregulates (16)  |
| CCL20  | CCL20              | Activated                         | 0.586          | Upregulates (24)  |

**TGFB1-regulated gene showing increased expression by SPP1 macrophages**

| ID      | Genes in dataset     | Prediction (based on measurement |                | Findings           |
|---------|----------------------|----------------------------------|----------------|--------------------|
|         |                      | direction)                       | Expr Log Ratio |                    |
| SPP1    | SPP1                 | Activated                        | 4.66           | Upregulates (6)    |
| CCL2    | CCL2                 | Activated                        | 4.341          | Upregulates (13)   |
| TIMP1   | TIMP1                | Activated                        | 2.213          | Upregulates (28)   |
| CCL3    | CCL3                 | Activated                        | 1.573          | Upregulates (1)    |
| CTSL    | CTSL                 | Activated                        | 1.55           | Upregulates (1)    |
| CXCL8   | CXCL8                | Inhibited                        | 1.277          | Downregulates (9)  |
| IL1RN   | IL1RN                | Activated                        | 1.104          | Upregulates (4)    |
| SOD2    | SOD2                 | Inhibited                        | 1.06           | Downregulates (1)  |
| SDC2    | SDC2                 | Activated                        | 1.02           | Upregulates (2)    |
| CTSB    | CTSB                 | Activated                        | 1.01           | Upregulates (5)    |
| SLC2A3  | SLC2A3               | Affected                         | 0.941          | Regulates (4)      |
| CALM3   | CALM1 (includes othe | Activated                        | 0.94           | Upregulates (1)    |
| CXCL2   | CXCL2                | Activated                        | 0.933          | Upregulates (1)    |
| CD36    | CD36                 | Inhibited                        | 0.883          | Downregulates (6)  |
| PLAUR   | PLAUR                | Activated                        | 0.866          | Upregulates (8)    |
| TYMP    | TYMP                 | Activated                        | 0.816          | Upregulates (2)    |
| IER3    | IER3                 | Activated                        | 0.8            | Upregulates (11)   |
| AREG    | AREG                 | Activated                        | 0.799          | Upregulates (11)   |
| LIMS1   | LIMS1                | Activated                        | 0.776          | Upregulates (1)    |
| HAMP    | HAMP                 | Activated                        | 0.771          | Upregulates (2)    |
| SGK1    | SGK1                 | Activated                        | 0.755          | Upregulates (10)   |
| CD14    | CD14                 | Activated                        | 0.747          | Upregulates (5)    |
| HIF1A   | HIF1A                | Activated                        | 0.737          | Upregulates (15)   |
| PDXK    | PDXK                 | Activated                        | 0.691          | Upregulates (1)    |
| BCAT1   | BCAT1                | Inhibited                        | 0.688          | Downregulates (1)  |
| EREG    | EREG                 | Activated                        | 0.669          | Upregulates (6)    |
| SOCS3   | SOCS3                | Activated                        | 0.644          | Upregulates (11)   |
| ATP13A3 | ATP13A3              | Affected                         | 0.643          | Regulates (2)      |
| HMGA1   | HMGA1                | Inhibited                        | 0.637          | Downregulates (11) |
| ENO1    | ENO1                 | Affected                         | 0.63           | Regulates (2)      |
| AQP9    | AQP9                 | Inhibited                        | 0.629          | Downregulates (1)  |
| FABP5   | FABP5                | Activated                        | 0.605          | Upregulates (1)    |
| HSPA5   | HSPA5                | Activated                        | 0.596          | Upregulates (1)    |
| CCL20   | CCL20                | Activated                        | 0.586          | Upregulates (4)    |
| HCST    | HCST                 | Inhibited                        | 0.572          | Downregulates (4)  |
| DUSP4   | DUSP4                | Activated                        | 0.57           | Upregulates (8)    |
| INSIG1  | INSIG1               | Affected                         | 0.558          | Regulates (2)      |
| CCR1    | CCR1                 | Activated                        | 0.555          | Upregulates (4)    |
| FOSB    | FOSB                 | Activated                        | 0.554          | Upregulates (6)    |
| NR4A2   | NR4A2                | Affected                         | 0.553          | Regulates (2)      |
| NAMPT   | NAMPT                | Affected                         | 0.528          | Regulates (1)      |
| ABCA1   | ABCA1                | Activated                        | 0.524          | Upregulates (3)    |
| CEBPD   | CEBPD                | Activated                        | 0.521          | Upregulates (1)    |
| NFKBIA  | NFKBIA               | Activated                        | 0.518          | Upregulates (11)   |
| VEGFA   | VEGFA                | Activated                        | 0.508          | Upregulates (51)   |
| NME1    | NME1                 | Activated                        | 0.505          | Upregulates (2)    |
| TGFB1   | TGFB1                | Activated                        | 0.489          | Upregulates (5)    |
| HMOX1   | HMOX1                | Activated                        | 0.483          | Upregulates (19)   |
| CHST11  | CHST11               | Activated                        | 0.481          | Upregulates (1)    |
| FOSL2   | FOSL2                | Activated                        | 0.459          | Upregulates (6)    |

**IL33-regulated gene showing increased expression by SPP1 macrophages**

| ID       | Genes in dataset | Prediction (based on measurement) |                | Findings          |
|----------|------------------|-----------------------------------|----------------|-------------------|
|          |                  | direction                         | Expr Log Ratio |                   |
| CCL2     | CCL2             | Activated                         | 4.341          | Upregulates (1)   |
| TIMP1    | TIMP1            | Activated                         | 2.213          | Upregulates (1)   |
| CCL3     | CCL3             | Activated                         | 1.573          | Upregulates (1)   |
| G0S2     | G0S2             | Affected                          | 1.481          | Regulates (1)     |
| S100A8   | S100A8           | Affected                          | 1.298          | Regulates (2)     |
| CXCL8    | CXCL8            | Activated                         | 1.277          | Upregulates (12)  |
| IL1RN    | IL1RN            | Activated                         | 1.104          | Upregulates (1)   |
| S100A9   | S100A9           | Activated                         | 1.083          | Upregulates (1)   |
| SOD2     | SOD2             | Activated                         | 1.06           | Upregulates (1)   |
| CXCL2    | CXCL2            | Activated                         | 0.933          | Upregulates (4)   |
| LGALS1   | LGALS1           | Affected                          | 0.922          | Regulates (1)     |
| RGS1     | RGS1             | Activated                         | 0.897          | Upregulates (1)   |
| CD36     | CD36             | Inhibited                         | 0.883          | Downregulates (4) |
| LILRB4   | LILRB4           | Inhibited                         | 0.84           | Downregulates (1) |
| IER3     | IER3             | Affected                          | 0.8            | Regulates (1)     |
| AREG     | AREG             | Activated                         | 0.799          | Upregulates (1)   |
| HIF1A    | HIF1A            | Inhibited                         | 0.737          | Downregulates (2) |
| MIF      | MIF              | Activated                         | 0.698          | Upregulates (2)   |
| CREM     | CREM             | Affected                          | 0.694          | Regulates (1)     |
| SCGB3A1  | SCGB3A1          | Inhibited                         | 0.653          | Downregulates (1) |
| SOCS3    | SOCS3            | Activated                         | 0.644          | Upregulates (1)   |
| CSTB     | CSTB             | Activated                         | 0.643          | Upregulates (2)   |
| DUSP2    | DUSP2            | Activated                         | 0.617          | Upregulates (1)   |
| CCR1     | CCR1             | Activated                         | 0.555          | Upregulates (1)   |
| ABCA1    | ABCA1            | Activated                         | 0.524          | Upregulates (4)   |
| NFKBIA   | NFKBIA           | Inhibited                         | 0.518          | Downregulates (8) |
| POLR2L   | POLR2L           | Activated                         | 0.509          | Upregulates (2)   |
| TNFRSF1B | TNFRSF1B         | Activated                         | 0.508          | Upregulates (2)   |
| VEGFA    | VEGFA            | Inhibited                         | 0.508          | Downregulates (1) |
| NME1     | NME1             | Activated                         | 0.505          | Upregulates (2)   |
| HMOX1    | HMOX1            | Activated                         | 0.483          | Upregulates (1)   |
| CHST11   | CHST11           | Activated                         | 0.481          | Upregulates (1)   |
| PEA15    | PEA15            | Activated                         | 0.477          | Upregulates (1)   |
| BCL2A1   | BCL2A1           | Activated                         | 0.461          | Upregulates (6)   |
| FOSL2    | FOSL2            | Affected                          | 0.459          | Regulates (1)     |
| ZEB2     | ZEB2             | Activated                         | 0.434          | Upregulates (1)   |
| TPI1     | TPI1             | Activated                         | 0.424          | Upregulates (2)   |
| GNA13    | GNA13            | Activated                         | 0.419          | Upregulates (1)   |
| APOE     | APOE             | Activated                         | 0.416          | Upregulates (4)   |
| ITGAM    | ITGAM            | Activated                         | 0.41           | Upregulates (2)   |
| ITGAX    | ITGAX            | Activated                         | 0.403          | Upregulates (2)   |
| JUNB     | JUNB             | Activated                         | 0.395          | Upregulates (2)   |
| IL4I1    | IL4I1            | Affected                          | 0.392          | Regulates (2)     |
| PAPSS2   | PAPSS2           | Affected                          | 0.389          | Regulates (1)     |
| ICAM1    | ICAM1            | Activated                         | 0.374          | Upregulates (2)   |
| HSPE1    | HSPE1            | Activated                         | 0.333          | Upregulates (2)   |
| CD83     | CD83             | Affected                          | 0.329          | Regulates (2)     |
| TLR2     | TLR2             | Activated                         | 0.311          | Upregulates (1)   |
| ATP5MPL  | ATP5MJ           | Activated                         | 0.31           | Upregulates (2)   |
| NFKB1    | NFKB1            | Activated                         | 0.299          | Upregulates (2)   |

**IL6-regulated gene showing increased expression by SPP1 macrophages**

| <b>ID</b> | <b>Genes in dataset</b> | <b>Prediction (based on measurement direction)</b> | <b>Expr Log Ratio</b> | <b>Findings</b>   |
|-----------|-------------------------|----------------------------------------------------|-----------------------|-------------------|
| SPP1      | SPP1                    | Activated                                          | 4.66                  | Upregulates (4)   |
| CCL2      | CCL2                    | Activated                                          | 4.341                 | Upregulates (17)  |
| TIMP1     | TIMP1                   | Activated                                          | 2.213                 | Upregulates (13)  |
| CCL7      | CCL7                    | Activated                                          | 1.568                 | Upregulates (1)   |
| CXCL8     | CXCL8                   | Activated                                          | 1.277                 | Upregulates (5)   |
| IL1RN     | IL1RN                   | Activated                                          | 1.104                 | Upregulates (11)  |
| S100A9    | S100A9                  | Activated                                          | 1.083                 | Upregulates (1)   |
| SOD2      | SOD2                    | Activated                                          | 1.06                  | Upregulates (4)   |
| CTSB      | CTSB                    | Activated                                          | 1.01                  | Upregulates (2)   |
| CXCL2     | CXCL2                   | Affected                                           | 0.933                 | Regulates (5)     |
| LGALS1    | LGALS1                  | Affected                                           | 0.922                 | Regulates (1)     |
| CD36      | CD36                    | Activated                                          | 0.883                 | Upregulates (2)   |
| CD48      | CD48                    | Affected                                           | 0.832                 | Regulates (1)     |
| AREG      | AREG                    | Activated                                          | 0.799                 | Upregulates (2)   |
| HAMP      | HAMP                    | Activated                                          | 0.771                 | Upregulates (27)  |
| IFITM3    | IFITM3                  | Activated                                          | 0.757                 | Upregulates (2)   |
| SGK1      | SGK1                    | Activated                                          | 0.755                 | Upregulates (13)  |
| CD14      | CD14                    | Affected                                           | 0.747                 | Regulates (1)     |
| HIF1A     | HIF1A                   | Activated                                          | 0.737                 | Upregulates (5)   |
| SMIM3     | SMIM3                   | Affected                                           | 0.681                 | Regulates (1)     |
| EREG      | EREG                    | Activated                                          | 0.669                 | Upregulates (12)  |
| SOCS3     | SOCS3                   | Activated                                          | 0.644                 | Upregulates (63)  |
| A2M       | A2M                     | Activated                                          | 0.631                 | Upregulates (11)  |
| HSPA5     | HSPA5                   | Activated                                          | 0.596                 | Upregulates (1)   |
| CCL20     | CCL20                   | Activated                                          | 0.586                 | Upregulates (13)  |
| PLEK      | PLEK                    | Activated                                          | 0.585                 | Upregulates (1)   |
| CCR1      | CCR1                    | Activated                                          | 0.555                 | Upregulates (1)   |
| NAMPT     | NAMPT                   | Activated                                          | 0.528                 | Upregulates (10)  |
| ABCA1     | ABCA1                   | Activated                                          | 0.524                 | Upregulates (2)   |
| CEBPD     | CEBPD                   | Activated                                          | 0.521                 | Upregulates (3)   |
| NFKBIA    | NFKBIA                  | Activated                                          | 0.518                 | Upregulates (1)   |
| TNFRSF1B  | TNFRSF1B                | Affected                                           | 0.508                 | Regulates (1)     |
| VEGFA     | VEGFA                   | Activated                                          | 0.508                 | Upregulates (31)  |
| HMOX1     | HMOX1                   | Activated                                          | 0.483                 | Upregulates (1)   |
| CYP1B1    | CYP1B1                  | Activated                                          | 0.465                 | Upregulates (1)   |
| CFLAR     | CFLAR                   | Activated                                          | 0.424                 | Upregulates (3)   |
| APOE      | APOE                    | Inhibited                                          | 0.416                 | Downregulates (1) |
| ADM       | ADM                     | Affected                                           | 0.413                 | Regulates (1)     |
| C5AR1     | C5AR1                   | Activated                                          | 0.411                 | Upregulates (3)   |
| ITGAM     | ITGAM                   | Activated                                          | 0.41                  | Upregulates (10)  |
| ETS2      | ETS2                    | Affected                                           | 0.402                 | Regulates (2)     |
| JUNB      | JUNB                    | Activated                                          | 0.395                 | Upregulates (24)  |
| ICAM1     | ICAM1                   | Activated                                          | 0.374                 | Upregulates (12)  |
| CSF1R     | CSF1R                   | Affected                                           | 0.361                 | Regulates (1)     |
| CDKN1A    | CDKN1A                  | Affected                                           | 0.339                 | Regulates (14)    |
| CD44      | CD44                    | Activated                                          | 0.337                 | Upregulates (1)   |
| MERTK     | MERTK                   | Activated                                          | 0.331                 | Upregulates (1)   |
| CD83      | CD83                    | Activated                                          | 0.329                 | Upregulates (2)   |
| MRAS      | MRAS                    | Affected                                           | 0.313                 | Regulates (1)     |
| TLR2      | TLR2                    | Inhibited                                          | 0.311                 | Downregulates (2) |
