# Supplementary material
Source: PubMed Central journal article supplement (PMC9771864)
Supplement: NIHMS1819536-supplement-Table_S6.pdf [file NIHMS1819536-supplement-Table_S6.pdf]

**Table S6. The table shows which top 20 genes upregulated in SPP1 macrophages are predicted target genes for each of the AP-1 proteins.**

| Transcription Factor | Target Gene |
|----------------------|-------------|
| JUND                 | GPNMB       |
|                      | FTL         |
|                      | C15orf48    |
|                      | IL1RN       |
| JUNB                 | IL1R        |
|                      | CCL18       |
| JUN                  | GPNMB       |
|                      | CTSD        |
| FOS                  | N/A         |
| FOSL1                | CCL2        |
|                      | CCL7        |
| FOSL2                | PLA2G7      |
| FOSB                 | CTSB        |
|                      | CCL7        |
|                      | LGALS1      |
| MAFF                 | C15orf48    |
|                      | IL1RN       |
| MAF                  | CTSB        |
| MAFB                 | N/A         |
| MAFA                 | N/A         |
| MAFG                 | N/A         |
| MAFK                 | N/A         |
